# Supplementary material for: The synergistic copper/ppm Pd-catalyzed hydrocarboxylation of alkynes with formic acid as a CO surrogate as well as a hydrogen source: an alternative indirect utilization of CO2
Source: Royal Society of Chemistry journal article supplement (doi:10.1039/d1gc02735b), 2021-01-01
Supplement: d1gc02735b1.pdf [file d1gc02735b1.pdf]

## Supporting Information

### **Synergistic copper/ppm Pd-catalyzed hydrocarboxylation of alkynes with formic acid as CO surrogate as well as hydrogen source: an alternative indirect utilization of CO<sub>2</sub>**

*Shu-Mei Xia, Zhi-Wen Yang, Xiang-Yang Yao, Kai-Hong Chen, Li-Qi Qiu, and Liang-Nian He\**

State Key Laboratory and Institute of Elemento-Organic Chemistry, College of Chemistry, Nankai

University, Tianjin 300071, P. R. China.

## Table of Contents

|                                                                  |     |
|------------------------------------------------------------------|-----|
| 1. General information .....                                     | S3  |
| 2. General procedure of the hydrocarboxylation of alkynes .....  | S4  |
| 3. Investigation of the key reaction parameters .....            | S5  |
| 4. General procedure for the gram-scale reactions .....          | S6  |
| 5. The effect of cooperative catalysis on the release of CO..... | S7  |
| 6. Control experiments .....                                     | S8  |
| 7. <sup>31</sup> P NMR investigation.....                        | S12 |
| 8. DFT Calculations .....                                        | S14 |
| 9. Hydride species detecting experiment .....                    | S15 |
| 10. Another possible mechanism .....                             | S16 |
| 11. Analytical data of the hydrocarboxylation products .....     | S17 |
| 12. References .....                                             | S56 |

## 1. General Information

### A. Materials:

Unless otherwise noted, all reagents were purchased from commercial sources and used as received. All the solvents used for reactions were distilled under argon after drying over an appropriate drying agent. All reactions were conducted in oven-dried glassware under argon atmosphere (purity  $\geq$  99.99%). Alkyne compounds were prepared according to literature procedure. DCOOD (99%-D) were purchased from Cambridge Isotope Laboratories and Innochem.

### B. Analytical Methods:

$^1\text{H}$ -NMR spectra were recorded on Bruker 400 MHz or 600 MHz spectrometer using  $\text{CDCl}_3$  (7.26 ppm), DMSO (2.50 ppm, 3.33 ppm of water peak), or Acetone (2.09 ppm) as solvent at ambient temperature. Data for  $^1\text{H}$ -NMR are reported as follows: chemical shift (ppm, scale), multiplicity (s = singlet, d = doublet, t = triplet, q = quartet, m = multiplet and/or multiplet resonances, br = broad), coupling constant (Hz), and integration.  $^{13}\text{C}$ -NMR spectra were recorded at 100.6 MHz in  $\text{CDCl}_3$  using  $\text{CDCl}_3$  (77.16 ppm) or DMSO- $d_6$  (40.45 ppm), Acetone (29.92, 206.68 ppm) as an internal reference. Data for  $^{13}\text{C}$ -NMR are reported in terms of chemical shift (ppm, scale), multiplicity, and coupling constants (Hz). Gaseous product CO was analyzed by gas chromatograph FULI 9790 equipped with thermal conductivity detector (TCD) with Ar as carrier gas, and the column oven was maintained at 70 °C for the duration of the analysis. High resolution mass spectral analysis (HRMS) was performed on a Varian 7.0 T FTICR-MS by ESI technique. Infrared (IR) spectra were recorded on a Bruker Tensor 27 FT-IR spectrophotometer with KBr pellets.

## 2. General procedure for the hydrocarboxylation of alkynes

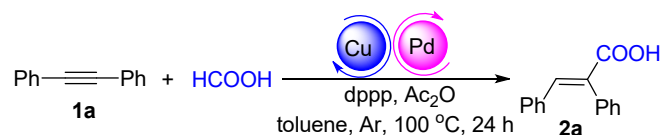

In an argon gas filled glove box, to an oven-dried 10 mL screw-cap reaction tube equipped with a stir bar was charged with Pd<sub>2</sub>(dba)<sub>3</sub> (50 ppm, 50 μL of the palladium solution (0.5 mM in toluene)), IPrCuCl (36.6 mg, 15 mol%), dppp (30.9 mg, 15 mol%) and dry toluene (1 mL). The resulting mixture was stirred at room temperature for 15 minutes. Alkyne substrate (0.5 mmol), formic acid (50 μL, 2.7 equiv.), and Ac<sub>2</sub>O (60 μL, 1.2 equiv.) were added subsequently and heated at 100 °C (oil bath) for 24 or 36 h. After the reaction mixture was cooled to room temperature, the yield of product was determined by <sup>1</sup>H NMR analysis using 1,3,5-trimethoxybenzene as an internal standard. To obtain pure products, the mixture was purified with silica gel chromatography (petroleum ether/ethyl acetate = 50/1 to 2/1). Then the products were determined by NMR and HRMS (ESI).



<sup>a</sup> Reaction conditions: diphenylacetylene **1a** (0.5 mmol), [Pd] (x ppm), [Cu] (y mol%), L (x equiv. relative to y mol% of IPrCuCl), HCOOH (50 μL, 2.7 equiv.), Ac<sub>2</sub>O (60 μL, 1.2 equiv.), toluene (1 mL) at t °C for 24 h under an argon atmosphere. <sup>b</sup> Yields were determined by <sup>1</sup>H NMR with 1,3,5-trimethoxybenzene as internal standard.

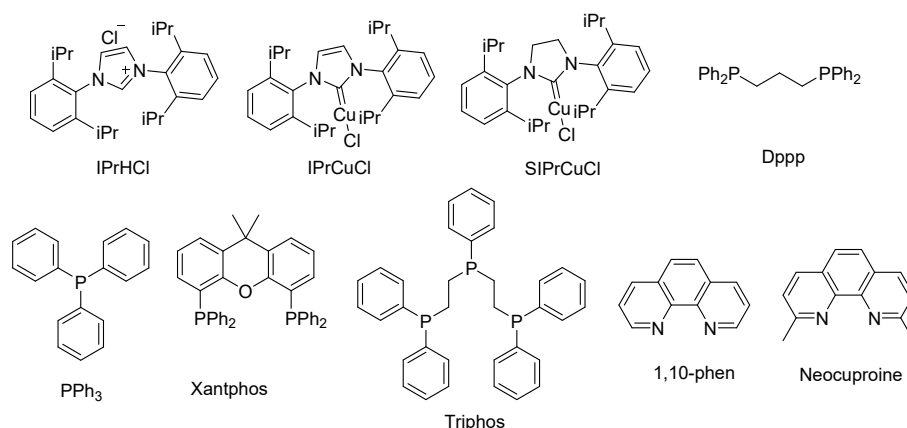

#### 4. General procedure for the gram-scale reactions.

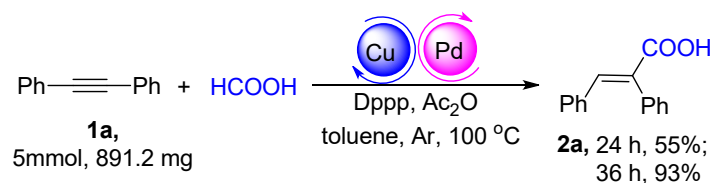

In a argon gas filled glove box, to an oven-dried 135 mL screw-cap reaction flask equipped with a stir bar was charged with Pd<sub>2</sub>(dba)<sub>3</sub> (100 ppm, 100 μL of the palladium solution (5 mM in toluene)), IPrCuCl (365.6 mg, 15 mol%), dppp (309.3 mg, 15 mol%) and dry toluene (25 mL). The mixture was stirred at room temperature for 15 minutes. Then diphenylacetylene (891.2 mg, 5 mmol), formic acid (509 μL, 13.5 mmol) and Ac<sub>2</sub>O (567 μL, 6 mmol) were added through the injection port. The reaction mixture was stirred at 100 °C. After 24 h or 36 h the pressure flask was cooled to the room temperature. The reaction mixture was transferred to a round bottom flask and the solvent was evaporated in vacuo. The <sup>1</sup>H NMR yields were determined with 1,3,5-trimethoxybenzene as internal standard and the ratio of α and β were determined by <sup>1</sup>H NMR. Subsequently, the residue was purified with silica gel chromatography using petroleum ether/EtOAc (50/1 to 5/1, v/v) as an eluent, giving the white solid product.

## 5. The effect of cooperative catalysis on the release of CO

In an argon gas filled glove box, an oven-dried 10 mL Schlenk tube equipped with a stir bar was charged with Pd<sub>2</sub>(dba)<sub>3</sub> (50 ppm, 50 μL of the palladium solution (0.5 mM in toluene)), IPrCuCl (36.6 mg, 15 mol%), dppp (30.9 mg, 15 mol%) and dry toluene (1 mL). The resulting mixture was stirred at room temperature for 15 minutes. Then formic acid (50 μL, 2.7 equiv.), and Ac<sub>2</sub>O (60 μL, 1.2 equiv.) were added subsequently and then CH<sub>4</sub> (1 mL) as an internal standard was added to the reaction system through the injection port. The reaction mixture was heated at 100 °C (oil bath) for t minutes. After the reaction mixture was cooled to room temperature, the mixed gas in tube was detected by GC to give the amount of CO (Table S1).

**Table S1.** The amount of CO produced under different catalytic systems. <sup>a,b</sup>

|                      |        |        |        |        |        |        |        |        |
|----------------------|--------|--------|--------|--------|--------|--------|--------|--------|
| t/min                | 2      | 20     | 40     | 60     | 80     | 100    |        |        |
| CO/μmol <sup>c</sup> | 18.15  | 18.77  | 23.33  | 29.76  | 92.95  | 91.95  |        |        |
| t/min                | 1      | 2      | 3      | 4      | 5      | 10     | 15     | 20     |
| CO/μmol <sup>d</sup> | 119.80 | 222.94 | 318.21 | 453.17 | 511.07 | 635.48 | 699.67 | 725.59 |
| t/min                | 0.5    | 1      | 1.5    | 2      | 5      | 10     | 15     | 20     |
| CO/μmol <sup>e</sup> | 14.55  | 47.52  | 219.10 | 301.43 | 426.37 | 530.42 | 533.43 | 534.43 |
| t/min                | 2      | 5      | 10     | 15     | 20     |        |        |        |
| CO/μmol <sup>f</sup> | 0      | 0      | 0      | 0      | 0      |        |        |        |

<sup>a</sup>Reaction conditions: Pd<sub>2</sub>(dba)<sub>3</sub> (50 ppm), IPrCuCl (15 mol%), dppp (15 mol%), HCOOH (50 μL, 2.7 equiv.), Ac<sub>2</sub>O (60 μL 1.2 equiv.), toluene (1 mL), 100 °C, t min. <sup>b</sup>The amount of gas was determined by GC using CH<sub>4</sub> (1 mL) as internal standard. <sup>c</sup>no catalysts. <sup>d</sup> Pd<sub>2</sub>(dba)<sub>3</sub> (50 ppm), IPrCuCl (15 mol%), dppp (15 mol%). <sup>e</sup>no IPrCuCl. <sup>f</sup>no Ac<sub>2</sub>O.

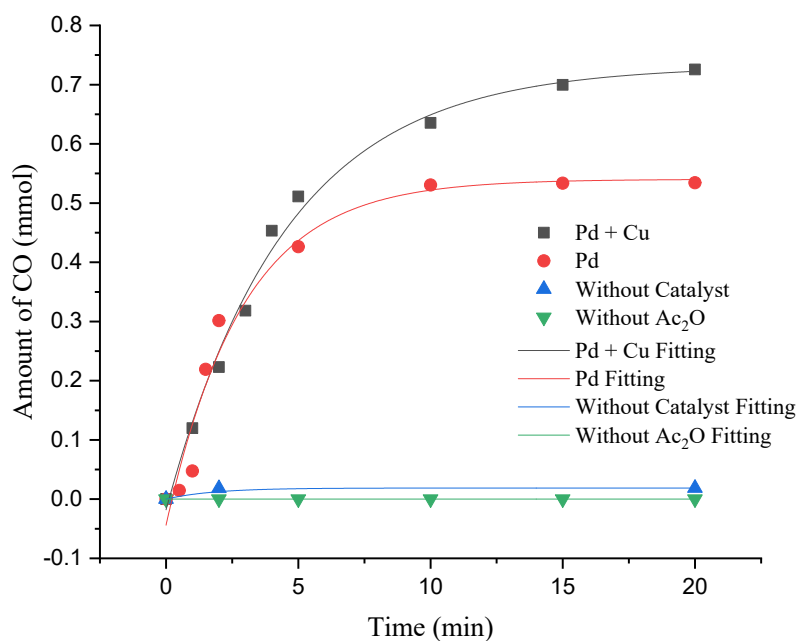

**Fig. S1** The effect of cooperative catalysis on the release of CO.

## 6. Control Experiments

### 6.1 The coordination model of Pd<sub>2</sub>(dba)<sub>3</sub> with dppp

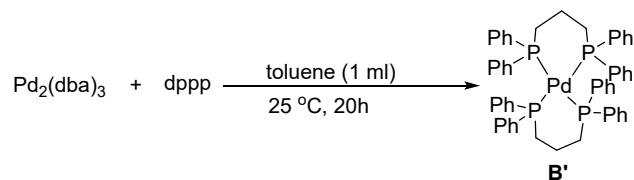

A Schlenk tube with a magnetic stir bar was charged with Pd<sub>2</sub>(dba)<sub>3</sub> (46 mg, 0.05 mmol), dppp (41.2 mg, 0.1 mmol) and dry toluene (1 mL). Then the reaction allows to stir at 25 °C for 12 h. Removal of volatiles under vacuum and 0.5 mL hexane and 0.5 mL toluene was added and standing the mixture at -20 °C, crystals suitable for X-ray crystallography was obtained and gave analytically pure product **B'**. The complex **B'** was then conducted for the hydrocarboxylation of alkynes under otherwise identical conditions in the absence of Pd<sub>2</sub>(dba)<sub>3</sub> and dppp. Subsequently, the reaction solution was purified with silica gel chromatography using petroleum ether/EtOAc (50/1 to 5/1, v/v) as an eluent, giving the white solid product in 78%.



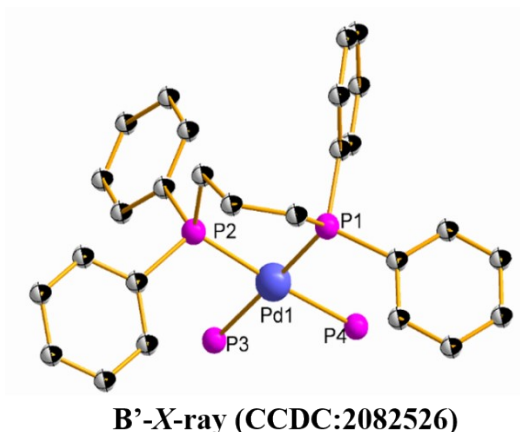

**Fig. S2** Molecular structure of palladium complex **B'**. H atoms are omitted for clarity.

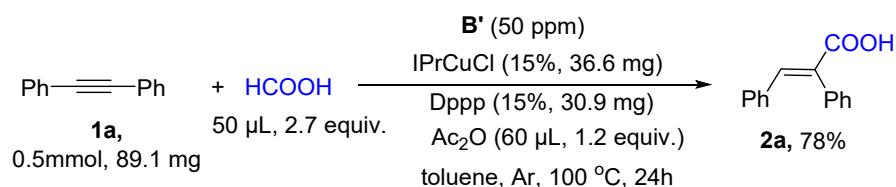

## 6.2 Separate Experiments

(1) In a argon-filled glove box, an oven-dried 10 mL screw-cap reaction tube equipped with a stir bar was charged with IPrCuCl (36.6 mg, 15 mol%), dppp (30.9 mg, 15 mol%), diphenylacetylene (89.1 mg, 0.5 mmol) and dry toluene (1 mL) at room temperature for about 15 min; Meanwhile, Pd<sub>2</sub>(dba)<sub>3</sub> (50 ppm, 50 μL of the palladium solution (0.5 mM in toluene)), dppp (100 ppm, 50 μL of the dppp solution (1 mM in toluene)), formic acid (50 μL, 2.7 equiv.) were stirred in toluene (1 mL) in a Schlenk flask at room temperature for 15 min. The Pd complex solution and Ac<sub>2</sub>O (60 μL, 1.2 equiv.) were then added into the screw-cap reaction tube equipped with Cu complex. Then the reaction was performed for 12 h at 100 °C. After the reaction was cooled down to room temperature, and the pressure was released carefully, the yield of **2a** determined by <sup>1</sup>HNMR analysis using 1,3,5-trimethoxybenzene as internal standard (eq1).

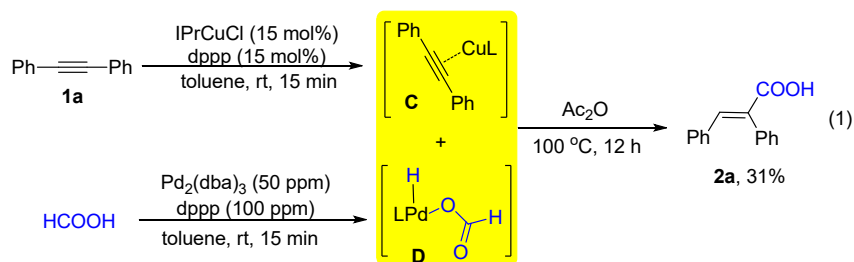

(2) In a argon-filled glove box, an oven-dried 10 mL screw-cap reaction tube equipped with a stir bar was charged with IPrCuCl (36.6 mg, 15 mol%), dppp (30.9 mg, 15 mol%), formic acid (50  $\mu$ L, 2.7 equiv.), and Ac<sub>2</sub>O (60  $\mu$ L, 1.2 equiv.) and dry toluene (1 mL) at room temperature for about 15 min; Meanwhile, Pd<sub>2</sub>(dba)<sub>3</sub> (50 ppm, 50  $\mu$ L of the palladium solution (0.5 mM in toluene)), dppp (100 ppm, 50  $\mu$ L of the dppp solution (1 mM in toluene)) diphenylacetylene (89.1 mg, 0.5 mmol) were stirred in toluene (1 mL) in a Schlenk flask at room temperature for 15 min. The Pd complex solution and Ac<sub>2</sub>O (60  $\mu$ L, 1.2 equiv.) were then added into the screw-cap reaction tube equipped with Cu complex. Then the reaction was performed for 12 h at 100 °C. After the reaction was cooled down to room temperature, and the pressure was released carefully, the yield of **2a** determined by <sup>1</sup>HNMR analysis using 1,3,5- trimethoxybenzene as internal standard (eq 2).

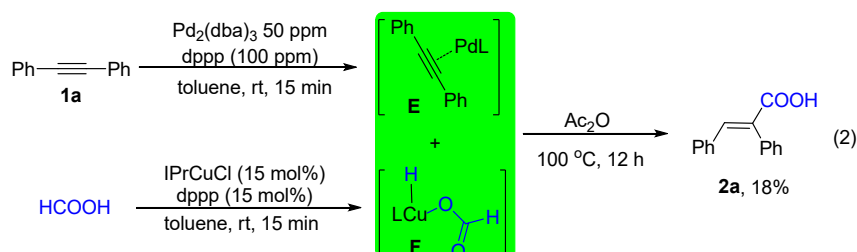

### 6.3 Study on key intermediates.

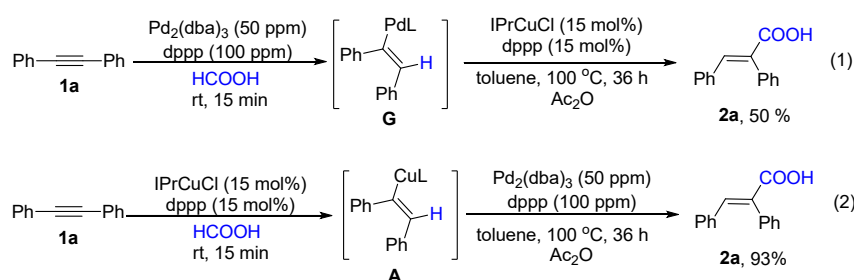

(1) In a argon-filled glove box, an oven-dried 10 mL screw-cap reaction tube equipped with a stir bar was charged with IPrCuCl (36.6 mg, 15 mol%), dppp (30.9 mg, 15 mol%),

mol%), diphenylacetylene (89.1 mg, 0.5 mmol), HCOOH (50  $\mu$ L, 2.7 equiv.) and dry toluene (1.5 mL) at room temperature for 15 min. Then Pd<sub>2</sub>(dba)<sub>3</sub> (50 ppm, 50  $\mu$ L of the palladium solution (0.5 mM in toluene)), dppp (100 ppm, 50  $\mu$ L of the dppp solution (1 mM in toluene)) and Ac<sub>2</sub>O (60  $\mu$ L, 1.2 equiv.) were added and the reaction was performed for 36 h at 100 °C. After the reaction was cooled down to room temperature, and the pressure was released carefully, 50% yield of **2a** was determined by <sup>1</sup>HNMR analysis using 1,3,5-trimethoxybenzene as internal standard (eq1).

(2) In a argon-filled glove box, an oven-dried 10 mL screw-cap reaction tube equipped with a stir bar was charged with Pd<sub>2</sub>(dba)<sub>3</sub> (50 ppm, 50  $\mu$ L of the palladium solution (0.5 mM in toluene)), dppp (100 ppm, 50  $\mu$ L of the dppp solution (1 mM in toluene)), diphenylacetylene (89.1 mg, 0.5 mmol), HCOOH (50  $\mu$ L, 2.7 equiv.) and dry toluene (1 mL) at room temperature for 15 min. Then IPrCuCl (36.6 mg, 15 mol%), dppp (30.9 mg, 15 mol%) and Ac<sub>2</sub>O (60  $\mu$ L, 1.2 equiv.) were added and the reaction was performed for 36 h at 100 °C. After the reaction was cooled down to room temperature, and the pressure was released carefully, 93% yield of **2a** was determined by <sup>1</sup>HNMR analysis using 1,3,5-trimethoxybenzene as internal standard (eq2).

#### 6.4 D-labeling experiments under DCOOD.

In an argon gas filled glove box, an oven-dried 10 mL screw-cap reaction tube equipped with a stir bar was charged with Pd<sub>2</sub>(dba)<sub>3</sub> (50 ppm, 50  $\mu$ L of the palladium solution (0.5 mM in toluene)), IPrCuCl (36.6 mg, 15 mol%), dppp (30.9 mg, 15 mol%) and dry toluene (1 mL). The resulting mixture was stirred at room temperature for 15 minutes. diphenylacetylene (0.5 mmol), DCOOD (50  $\mu$ L, 2.7 equiv.), and Ac<sub>2</sub>O (60  $\mu$ L, 1.2 equiv.) were added subsequently and heated at 100 °C (oil bath) for 36 h. After the reaction mixture was cooled to room temperature, the mixture was purified with silica gel chromatography (petroleum ether/ethyl acetate = 50/1 to 2/1) to give **d-2a** as a white solid (74.6 mg, 66%). <sup>1</sup>H NMR (400 MHz, CDCl<sub>3</sub>)  $\delta$  7.96 (s, 0.3H), 7.37 (s, 3H), 7.28 – 7.16 (m, 5H), 7.09 – 7.05 (m, 2H). <sup>13</sup>C NMR (101 MHz, CDCl<sub>3</sub>)  $\delta$  173.3, 142.4, 135.3, 134.2, 131.5, 130.8, 129.7,

129.5, 128.7, 128.2, 128.0. HRMS (ESI) *calcd.* for (C<sub>9</sub>H<sub>16</sub>O<sub>2</sub>-H): 155.1072, *found*: 155.1077. IR (KBr): 3500-2900 (br), 1673.3, 1612.9, 1448.3, 1417.2, 1325.8, 1264.6, 1185.3, 917.2, 770.6, 697.4, 600.0, 472.4, 435.3 cm<sup>-1</sup>

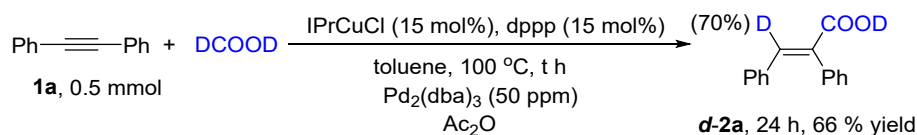

According to the <sup>1</sup>H NMR spectrum of D-labeling experiment, the hydrogen of the carboxyl group in the product is completely deuterated (100%) and the deuterium at the β-carbon to the carboxyl group was determined to be 46% by <sup>1</sup>H NMR, in which the relative ratio of non-labeled **2a** to D-labeled **2a** is 3:7.

The <sup>1</sup>H NMR chart of D-labeling experiment is given as bellow:

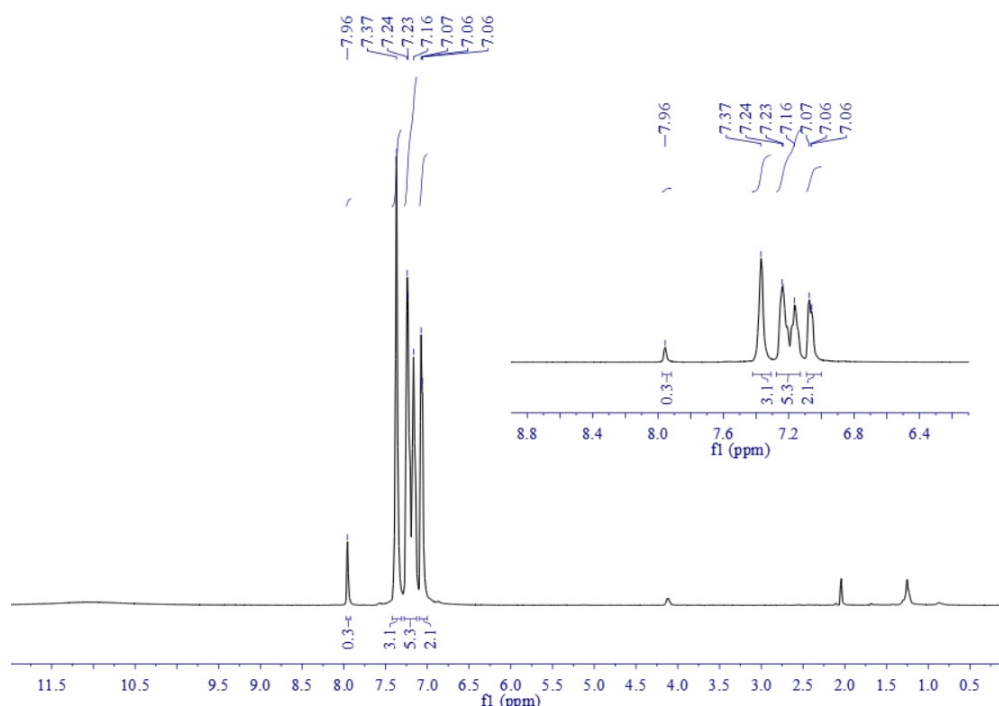

## 7. <sup>31</sup>P NMR Investigation

(a) 0.1 mmol of dppp was dissolved in 0.5 ml of C<sub>6</sub>D<sub>6</sub> in a NMR tube. The reaction was complete after standing the mixture at room temperature for 6 h as indicated from <sup>31</sup>P NMR spectra. <sup>31</sup>P NMR (160 MHz, C<sub>6</sub>D<sub>6</sub>): δ -17.74.

(b)

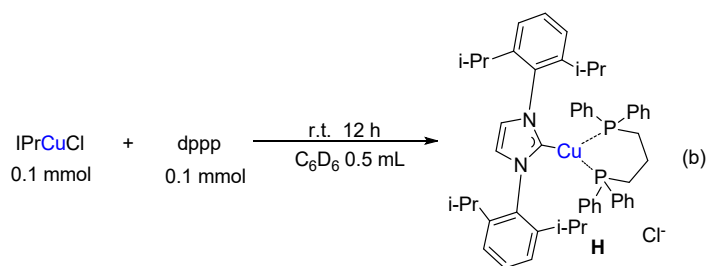

0.1 mmol of IPrCuCl and 0.1 mmol of dppp were dissolved in 0.5 mL of  $\text{C}_6\text{D}_6$  in a NMR tube. The reaction was complete after standing the mixture at room temperature for 6 h as indicated from  $^{31}\text{P}$  NMR spectra.  $^{31}\text{P}$  NMR (160 MHz,  $\text{C}_6\text{D}_6$ ):  $\delta$  -13.68, -17.74.

(c)

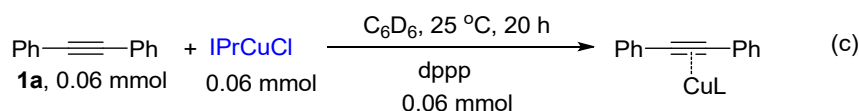

0.06 mmol of IPrCuCl, 0.06 mmol of dppp and 0.06 mmol diphenylacetylene **1a** were dissolved in 0.5 mL of  $\text{C}_6\text{D}_6$  in a NMR tube. The reaction was complete after standing the mixture at room temperature for 6 h as indicated from  $^{31}\text{P}$  NMR spectra.  $^{31}\text{P}$  NMR (160 MHz,  $\text{C}_6\text{D}_6$ ):  $\delta$  -3.89, -13.66, -17.74.

(d)

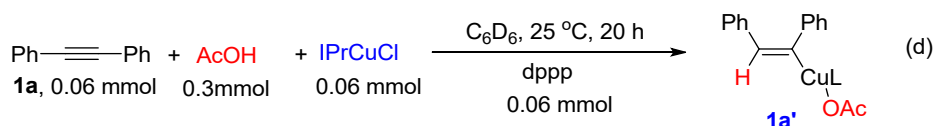

0.06 mmol of 1,2-diphenylethyne (**1a**), 0.06 mmol of IPrCuCl and 0.06 mmol of dppp were dissolved in 0.5 mL of  $\text{C}_6\text{D}_6$  in NMR tube. 0.3 mmol of AcOH was then injected. The reaction was complete after standing the mixture at room temperature for 20 h and indicated by  $^{31}\text{P}$  NMR spectra.  $^{31}\text{P}$  NMR (160 MHz,  $\text{C}_6\text{D}_6$ ):  $\delta$  -4.22, -13.66.

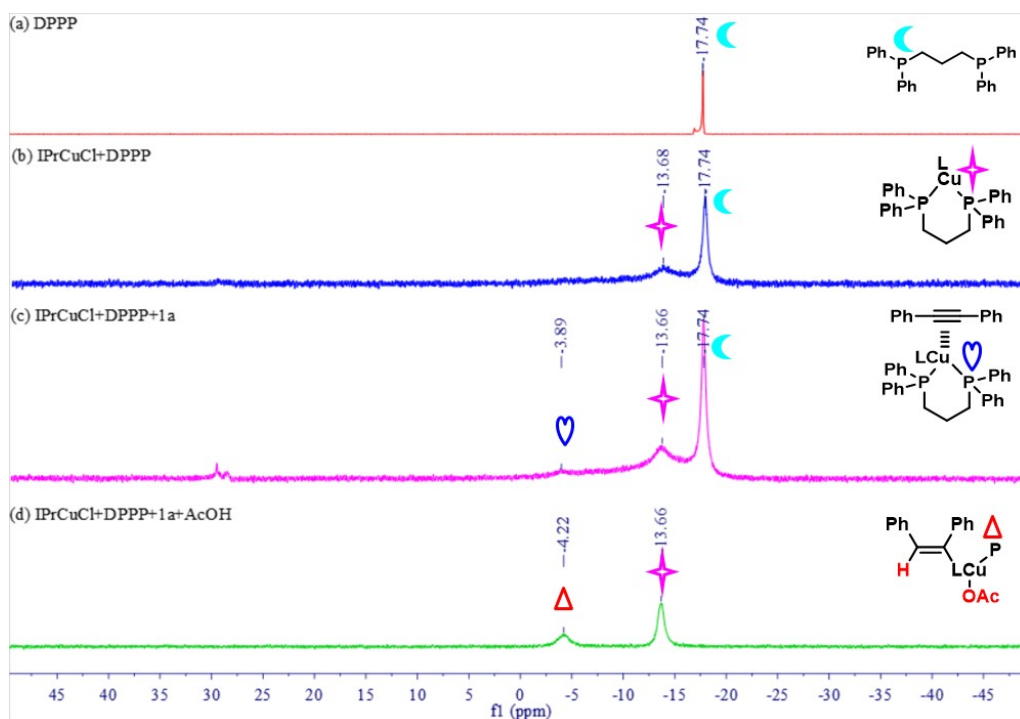

**Fig. S3**  $^{31}\text{P}$  NMR investigation (161 MHz).

To further verify our hypothesis that the carbon-carbon triple bond of alkyne could be activated by the coordinate chelation of IPrCuCl with dppp,<sup>5</sup> control experiments in the absence of Pd species were examined and monitored by  $^{31}\text{P}$  NMR technique. As depicted in Fig. S3, the  $^{31}\text{P}$  signal of dppp appeared at  $\delta = -17.74$  ppm in accordance with the reported literature (Fig. S3a);<sup>5b,c</sup> a broad signal emerged at  $\delta = -13.68$  ppm when IPrCuCl reacted with dppp in  $\text{C}_6\text{D}_6$  for 6 h, being assigned to the formation of [IPrCu(dppp)]Cl chelate complex **H**, locating in the range of copper (I) diphosphine complexes typically observed<sup>5a</sup> (Fig. S3b). After the input of model substrate **1a**, IPrCuCl and dppp were consumed for 6 h at room temperature, and subsequently a characteristic  $^{31}\text{P}$  signal could be observed at  $-3.89$  ppm, indicative of the possible intermediates between  $\text{C}\equiv\text{C}$  bond and copper species (Fig. S3c). According to the reported literature,<sup>5f</sup> the facile decomposition of alkenylmetal complex with  $\text{HCOOH}$

lead to poor detection, so acetic acid was added to the mixture of IPrCuCl and diphenylacetylene **1a** instead of formic acid (Fig. S3d), giving rise to one singlet at -4.22 ppm, being attributed to the formation of the corresponding alkenyl copper complex **1a'**.

## 8. DFT Calculation

Theoretical calculations were performed with the Gaussian 09 program<sup>6</sup>. Geometry optimizations and frequency calculations were carried out at the DFT-D3(BJ) functional with B3LYP<sup>7-10</sup>/LANL2DZ for Pd atom and 6-31G(d) for other atoms. Single point energy calculations for optimized structures were performed at DFT-D3(BJ) functional with def2-TZVP level and SMD(toluene)<sup>11</sup> solvation model was used to account for solvent effects.

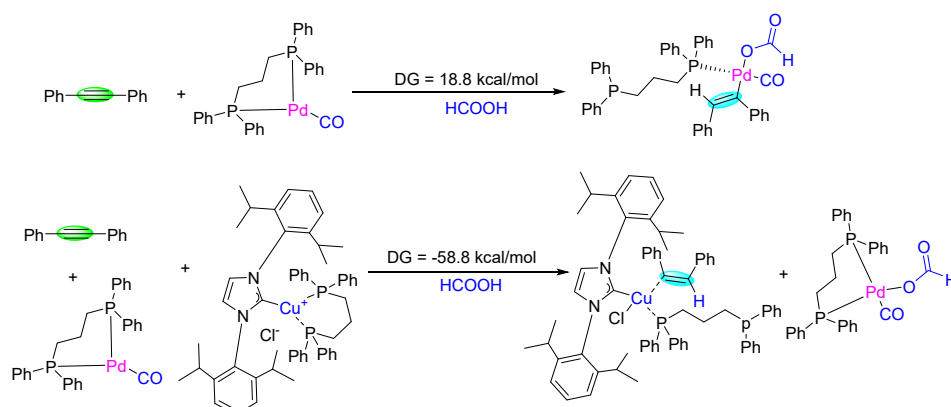

**Fig. S4** DFT-D3(BJ) calculations on Cu/Pd (ppm) synergistic effects at SMD (toluene)-B3LYP/def2-TZVP//B3LYP/6-31G(d)+LANL2DZ(Pd) level.

## 9. Hydride Species Detecting Experiment

In a argon gas filled glove box, an oven-dried 10 mL screw-cap reaction tube equipped with a stir bar was charged with  $\text{Pd}_2(\text{dba})_3$  (50 ppm, 50  $\mu\text{L}$  of the palladium solution (0.5 mM in toluene)), IPrCuCl (7.3 mg, 15 mol%), dppp (6.2 mg, 15 mol%) and dry toluene (1 ml). The resulting mixture was stirred at room temperature for 15 minutes. Alkyne substrate (0.1 mmol), formic acid (10  $\mu\text{L}$ , 2.7 equiv.), and  $\text{Ac}_2\text{O}$  (12

$\mu\text{L}$ , 1.2 equiv.) were added subsequently and stirred at room temperature for 15 minutes. Then, the mixture was transferred to NMR tube before being sealed. The NMR tube was placed into pre-heated NMR spectrometer (25 °C). We could also find that the hydride species could be clearly observed via  $^1\text{H}$  NMR after the NMR spectrometer temperature rised to 80 °C.

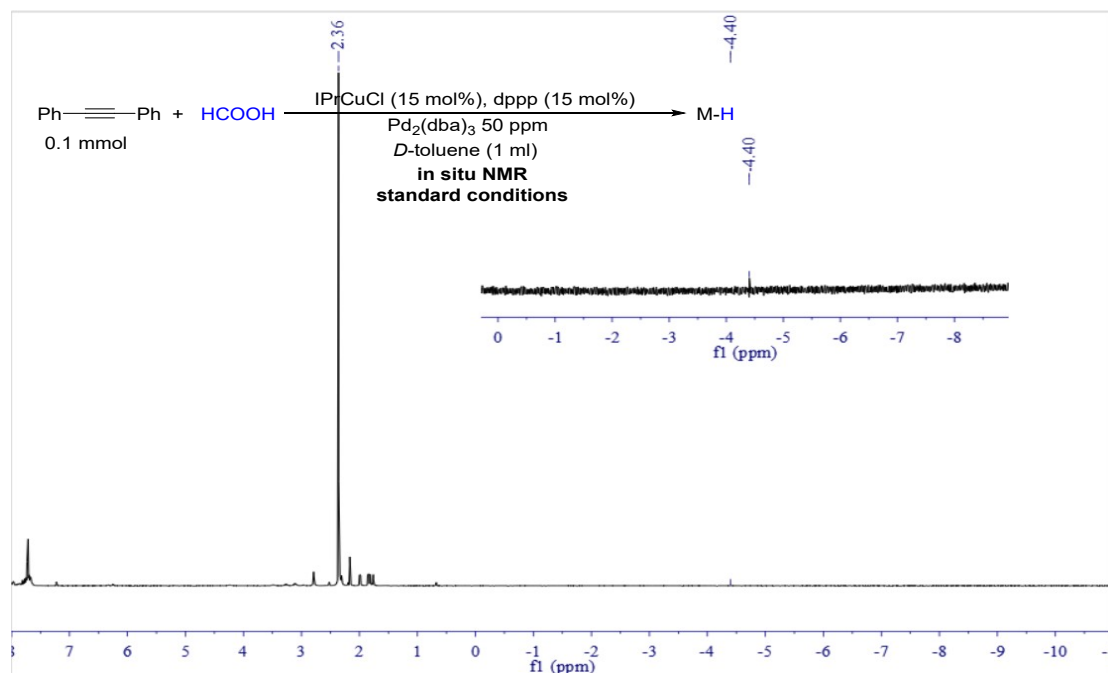

## 10. Another possible mechanism

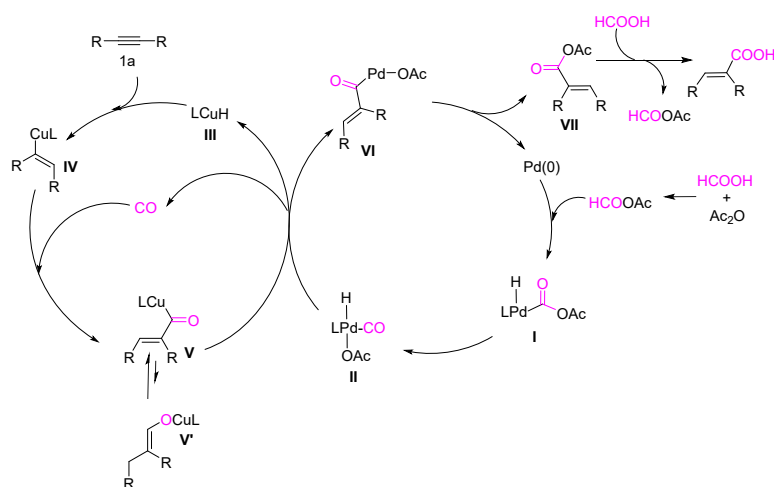



The mechanism may also undergo another Pd-catalyzed cycle. Firstly, oxidative insertion of Pd(0) to HCOOAc (generated from HCOOH and Ac<sub>2</sub>O) gives H-Pd-OOAc complex **I**, which subsequently undergoes rearrangement to give H-Pd-CO species **II**. At the same time, *syn*-addition of the Cu-H species **III** with alkyne leads to the formation of the alkenyl copper complex **IV**. Then the insertion of CO generated *in situ* from Pd-CO species **II** into the C-Cu bond of complex **IV** to provide an acryloylcopper species **V** with the rearrangement to the complex **V'**. Transmetalation with H-Pd-CO species **II**, ensues to give the corresponding acyl palladium species **VI** and regenerate the Cu-H species **III** for the Cu-catalyzed cycle. The reductive elimination of complex **VI** produces the anhydride **VII**, which finally undergoes hydrolyzation with HCOOH to give the desired product and HCOOAc, and simultaneously regenerates the Pd<sup>0</sup> species for the Pd-catalyzed cycle.

## 11. Analytical data of the hydrocarboxylation products

### 11.1 Structure characterization results

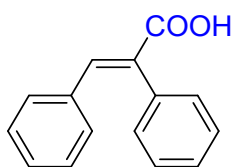

(*E*)-2,3-diphenylacrylic acid (**2a**)<sup>1</sup>

White solid, m.p. 167-171 °C. <sup>1</sup>H NMR (400 MHz, CDCl<sub>3</sub>) δ 7.95 (s, 1H), 7.43-7.31 (m, 3H), 7.27-7.12 (m, 5H), 7.07-7.05 (m, 2H). <sup>13</sup>C NMR (101 MHz, CDCl<sub>3</sub>) δ 173.1, 142.6, 135.4, 134.5, 131.8, 131.0, 129.9, 129.6, 128.9, 128.4, 128.2. HRMS (ESI) *calcd.* for (C<sub>15</sub>H<sub>12</sub>O<sub>2</sub>-H): 223.0759, *found*: 223.0764. IR (KBr): 3500-2900 (br), 1678.8, 1621.7, 1456.1, 1268.8, 753.6, 617.3, 479.3 cm<sup>-1</sup>

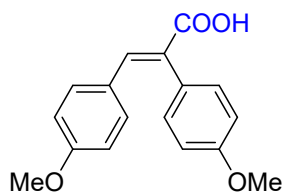

(*E*)-2,3-bis(4-methoxyphenyl)acrylic acid (**2b**)<sup>2</sup>

Light yellow solid, m.p. 210-214 °C. <sup>1</sup>H NMR (400 MHz, CDCl<sub>3</sub>) δ 7.88 (s, 1H), 7.18 (d, *J* = 6.5 Hz, 2H), 7.06 (d, *J* = 6.8 Hz, 2H), 6.94 (d, *J* = 8.6 Hz, 2H), 6.71 (d, *J* = 6.7 Hz, 2H), 3.85 (s, 3H), 3.77 (s, 3H). <sup>13</sup>C NMR (101 MHz, CDCl<sub>3</sub>) δ 173.6, 160.6, 159.3, 142.1, 132.8, 131.1, 128.8, 127.9, 127.2, 114.4, 113.9, 55.4, 55.3. HRMS (ESI) *calcd.* for (C<sub>17</sub>H<sub>16</sub>O<sub>4</sub>-H): 283.0970, *found*: 283.0980. IR (KBr): 3700-2900 (br), 1699.2, 1505.1, 1458.7, 1356.6, 1269.7, 1014.2, 754.7, 617.0 cm<sup>-1</sup>.

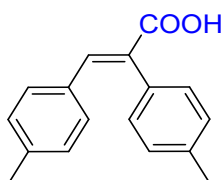

(*E*)-2,3-di-*p*-tolylacrylic acid (**2c**)<sup>1</sup>

White solid, m.p. 178-182 °C. <sup>1</sup>H NMR (400 MHz, CDCl<sub>3</sub>) δ 7.90 (s, 1H), 7.17 (dd, *J* = 24.9, 7.8 Hz, 2H), 7.00 (s, 1H), 2.40 (s, 3H), 2.29 (s, 3H). <sup>13</sup>C NMR (101 MHz, CDCl<sub>3</sub>) δ 173.8, 142.4, 139.9, 137.8, 132.6, 131.8, 131.0, 130.8, 129.7, 129.6, 129.1, 21.5. HRMS (ESI) *calcd.* for (C<sub>17</sub>H<sub>16</sub>O<sub>2</sub>-H): 251.1072, *found*: 251.1077. IR (KBr): 3600-2900(br), 1682.6, 1630.9, 1459.9, 1267.4, 1093.9, 752.9 621.2 cm<sup>-1</sup>.

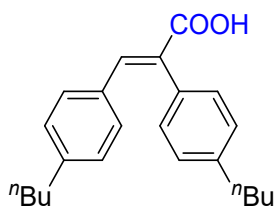

(*E*)-2,3-bis(4-butylphenyl)acrylic acid (**2d**)<sup>1</sup>

White solid, m.p. 73-77 °C. <sup>1</sup>H NMR (400 MHz, CDCl<sub>3</sub>) δ 12.43 (s, 1H), 7.90 (s, 1H), 7.21 – 7.10 (m, 4H), 7.00 – 6.92 (m, 4H), 2.64 (t, *J* = 7.7 Hz, 2H), 2.51 (t, *J* = 7.7 Hz, 2H), 1.63 (dt, *J* = 15.3, 7.6 Hz, 2H), 1.52 (dt, *J* = 15.3, 7.6 Hz, 2H), 1.38 (dt, *J* = 14.8, 7.4 Hz, 2H), 1.33 – 1.23 (m, 2H), 0.94 (t, *J* = 7.3 Hz, 3H), 0.88 (t, *J* = 7.3 Hz, 3H). <sup>13</sup>C NMR (101 MHz, CDCl<sub>3</sub>) δ 173.8, 144.8, 142.6, 142.2, 132.9, 131.9, 131.1, 130.9, 129.6, 128.8, 128.4, 35.6, 35.5, 33.5, 33.3, 22.5, 22.4, 14.1,

14.0. HRMS (ESI) *calcd.* for (C<sub>23</sub>H<sub>28</sub>O<sub>2</sub>-H): 335.2011, *found*: 335.2011. IR (KBr): 3400-2800 (br), 1691.3, 1643.0, 1463.7, 1420.1, 1268.3, 1018.4, 753.2, 630.6 cm<sup>-1</sup>.

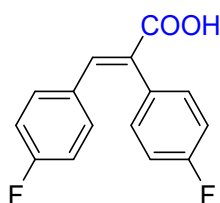

(*E*)-2,3-bis(4-fluorophenyl)acrylic acid (**2e**)

White solid, m.p. 169-171 °C. <sup>1</sup>H NMR (400 MHz, CDCl<sub>3</sub>) δ 7.93 (s, 1H), 7.21 (m, 2H), 7.14 – 7.02 (m, 4H), 6.89 (t, *J* = 8.7 Hz, 2H). <sup>13</sup>C NMR (101 MHz, CDCl<sub>3</sub>) δ 173.1 (s), 164.1 (d, *J*<sup>F</sup> = 253.4 Hz), 162.4 (d, *J*<sup>F</sup> = 249.1 Hz), 141.8 (s), 132.9 (d, *J*<sup>F</sup> = 8.4 Hz), 131.8 (d, *J*<sup>F</sup> = 8.0 Hz), 130.9 (d, *J*<sup>F</sup> = 3.5 Hz), 130.4 (d, *J*<sup>F</sup> = 3.7 Hz), 116.1 (d, *J*<sup>F</sup> = 21.5 Hz), 115.7 (d, *J*<sup>F</sup> = 21.6 Hz). <sup>19</sup>F NMR (376 MHz, CDCl<sub>3</sub>) δ -109.51, -113.24. HRMS (ESI) *calcd.* for (C<sub>15</sub>H<sub>10</sub>F<sub>2</sub>O<sub>2</sub>-H): 259.0571, *found*: 259.0580. IR (KBr): 3700-2900 (br), 1688.9, 1624.5, 1513.3, 1463.9, 1268.4, 1020.8, 754.4, 616.5 cm<sup>-1</sup>.

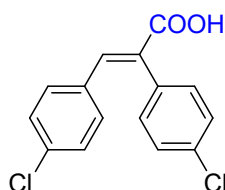

(*E*)-2,3-bis(4-chlorophenyl)acrylic acid (**2f**)<sup>1</sup>

Light yellow solid, m.p. 178-181 °C. <sup>1</sup>H NMR (400 MHz, CDCl<sub>3</sub>) δ 7.91 (s, 1H), 7.40 – 7.35 (m, 2H), 7.21 – 7.15 (m, 4H), 7.03 – 6.98 (m, 2H). <sup>13</sup>C NMR (101 MHz, CDCl<sub>3</sub>) δ 172.6, 141.7, 135.9, 134.5, 133.4, 132.5, 132.0, 131.3, 131.1, 129.3, 128.9. HRMS (ESI) *calcd.* for (C<sub>15</sub>H<sub>10</sub>Cl<sub>2</sub>O<sub>2</sub>-H): 290.9980, *found*: 290.9988. IR (KBr): 3500-2900 (br), 1625.6, 1458.0, 1383.5, 1300.4, 1224.7, 1088.1, 793.5, 720.5, 621.6 cm<sup>-1</sup>.

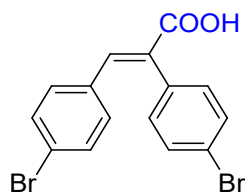

(*E*)-2,3-bis(4-bromophenyl)acrylic acid (**2g**)<sup>1</sup>

Light yellow solid, m.p. 188-190 °C. <sup>1</sup>H NMR (400 MHz, CDCl<sub>3</sub>) δ 7.89 (s, 1H), 7.52 (d, *J* = 8.3 Hz, 2H), 7.34 (d, *J* = 8.4 Hz, 2H), 7.10 (d, *J* = 8.3 Hz, 2H), 6.94 (d, *J* = 8.5 Hz, 2H). <sup>13</sup>C NMR (101 MHz, CDCl<sub>3</sub>) δ 172.5, 141.8, 133.8, 132.9, 132.2, 131.8, 131.6, 131.2, 124.3, 122.7. HRMS (ESI) *calcd.* for (C<sub>15</sub>H<sub>10</sub>Br<sub>2</sub>O<sub>2</sub>-H): 378.8969, *found*: 378.8968. IR (KBr): 3600-2900 (br), 1626.3, 1267.5, 1149.7, 1080.4, 945.9, 753.9, 616.3, 478.8 cm<sup>-1</sup>.

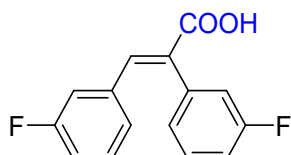

(*E*)-2,3-bis(3-fluorophenyl)acrylic acid (**2h**)<sup>1</sup>

White solid, m.p. 160-161 °C. <sup>1</sup>H NMR (400 MHz, CDCl<sub>3</sub>) δ 7.90 (s, 1H), 7.34 (d, *J* = 2.8 Hz, 1H), 7.17 (d, *J* = 2.8 Hz, 1H), 7.07 (m, 1H), 7.03-6.92 (m, 3H), 6.89 (d, *J* = 7.6 Hz, 1H), 6.70 (d, *J* = 9.7 Hz, 1H). <sup>13</sup>C NMR (101 MHz, CDCl<sub>3</sub>) δ 172.2, 164.3, 163.7, 161.8, 161.3, 141.5, 137.0 (d, *J*<sup>F</sup> = 8.1 Hz), 136.1 (d, *J*<sup>F</sup> = 8.1 Hz), 132.0, 130.6 (d, *J*<sup>F</sup> = 8.2 Hz), 130.0 (d, *J*<sup>F</sup> = 8.2 Hz), 126.8 (d, *J*<sup>F</sup> = 2.9 Hz), 125.6 (d, *J*<sup>F</sup> = 2.9 Hz), 117.0 (t, *J*<sup>F</sup> = 22.1 Hz), 115.5 (d, *J*<sup>F</sup> = 20.9 Hz). HRMS (ESI) *calcd.* for (C<sub>15</sub>H<sub>10</sub>F<sub>2</sub>O<sub>2</sub>-H): 259.0571, *found*: 259.0577. IR (KBr): 3100-2900 (br), 1688.7, 1624.7, 1514.2, 1463.9, 1268.4, 1020.1, 754.4, 615.0, 480.5 cm<sup>-1</sup>.

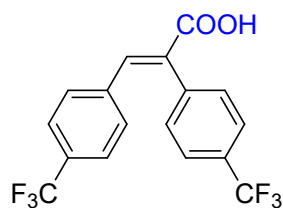

(*E*)-2,3-bis(4-(trifluoromethyl)phenyl)acrylic acid (**2i**)<sup>1</sup>

White solid, m.p. 227-230 °C. <sup>1</sup>H NMR (400 MHz, CDCl<sub>3</sub>) δ 8.04 (s, 1H), 7.66 (d, *J* = 7.9 Hz, 2H), 7.47 (d, *J* = 8.0 Hz, 2H), 7.37 (d, *J* = 7.8 Hz, 2H), 7.16 (d, *J* = 7.9 Hz, 2H). <sup>13</sup>C NMR (101 MHz, CDCl<sub>3</sub>) δ 172.1, 142.0, 138.3, 137.2, 132.7, 131.5 (d, *J*<sup>F</sup> = 33.3 Hz), 130.9, 130.8 (d, *J*<sup>F</sup> = 32.3 Hz), 130.5, 125.9 (q, *J*<sup>F</sup> = 4.0 Hz), 125.6 (q, *J*<sup>F</sup> = 4.0 Hz), 124.1 (d, *J*<sup>F</sup> = 273.7 Hz), 123.8 (d, *J*<sup>F</sup> = 273.7 Hz). HRMS (ESI) *calcd.* for (C<sub>17</sub>H<sub>10</sub>F<sub>6</sub>O<sub>2</sub>-H): 359.0507, *found*: 359.0502. IR (KBr): 3100-2500 (br), 1685.2,

1614.1, 1418.7, 1328.9, 1301.6, 1167.61, 1128.5, 1068.9, 913.4, 843.5, 700.0, 654.9, 598.3  $\text{cm}^{-1}$ .

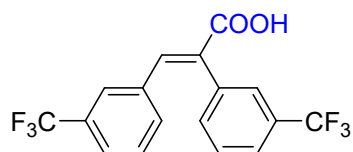

(*E*)-2,3-bis(3-(trifluoromethyl)phenyl)acrylic acid (**2j**)<sup>1</sup>

White solid, m.p. 87-88 °C. <sup>1</sup>H NMR (400 MHz, CDCl<sub>3</sub>)  $\delta$  12.31 (s, 1H), 8.05 (s, 1H), 7.66 (d,  $J = 7.6$  Hz, 1H), 7.57 – 7.48 (m, 3H), 7.43 (d,  $J = 7.5$  Hz, 1H), 7.32 (t,  $J = 7.8$  Hz, 1H), 7.27 (s, 1H), 7.21 (d,  $J = 7.7$  Hz, 1H). <sup>13</sup>C NMR (101 MHz, CDCl<sub>3</sub>)  $\delta$  172.7, 142.1, 135.4, 134.6, 133.7, 133.5, 132.3, 131.6 (d,  $J^F = 32.3$  Hz), 131.1 (d,  $J^F = 32.3$  Hz), 129.6, 129.2, 127.4 (q,  $J^F = 11.3$  Hz), 126.9 (d,  $J^F = 3.7$  Hz), 126.5 (d,  $J^F = 3.4$  Hz), 125.4 (d,  $J^F = 3.7$  Hz), 125.1 (d,  $J^F = 31.3$  Hz), 122.4 (d,  $J^F = 31.2$  Hz). HRMS (ESI) *calcd.* for (C<sub>17</sub>H<sub>10</sub>F<sub>6</sub>O<sub>2</sub>-H): 359.0507, *found*: 359.0504. IR (KBr): 3100-2500 (br), 1696.0, 1620.5, 1424.1, 1329.7, 1295.8, 1201.4, 1175.8, 1167.6, 1124.4, 1073.2, 919.3, 808.5, 688.4, 654.5  $\text{cm}^{-1}$ .

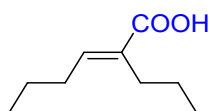

(*E*)-2-propylhex-2-enoic acid (**2o**)<sup>3</sup>

Colourless Oil, <sup>1</sup>H NMR (400 MHz, CDCl<sub>3</sub>)  $\delta$  6.92 (t,  $J = 7.5$  Hz, 1H), 2.32-2.24 (m, 2H), 2.19 (m, 2H), 1.54 -1.38 (m, 4H), 0.98-0.89 (m, 5H). <sup>13</sup>C NMR (101 MHz, CDCl<sub>3</sub>)  $\delta$  173.6, 145.6, 131.8, 30.9, 28.5, 22.6, 22.1, 14.1, 14.1. HRMS (ESI) *calcd.* for (C<sub>9</sub>H<sub>16</sub>O<sub>2</sub>-H): 155.1072, *found*: 155.1077. IR (KBr): 3400-2900 (br), 1745.7, 1625.8, 1464.2, 1414.2, 1268.3, 1057.3, 1020.9, 753.5, 616.8, 480.7  $\text{cm}^{-1}$ .

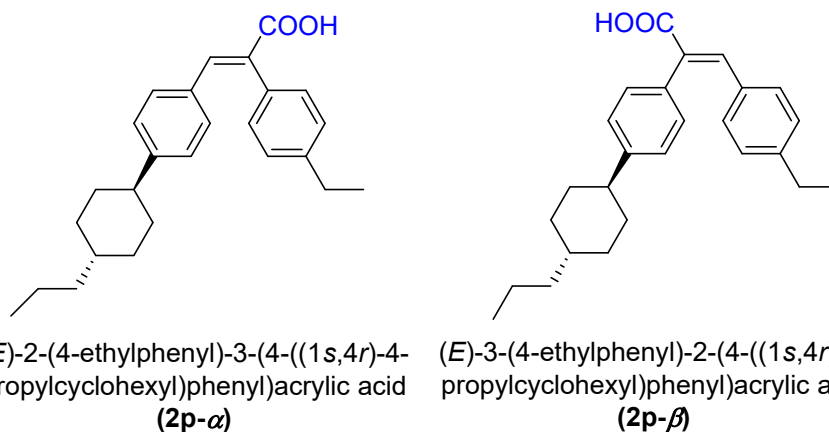

White solid, m.p. 161-163°C. The  $\alpha/\beta$  mixture cannot be separated (**2p**,  $\alpha:\beta=46:54$ ).  $^1\text{H}$  NMR (400 MHz,  $\text{CDCl}_3$ )  $\delta$  12.09 (s, 1H), 7.89 (s, 1H), 7.20 (d,  $J = 7.9$  Hz, 2H), 7.17-7.10 (m, 2H), 6.98 (d,  $J = 8.7$  Hz, 4H), 2.68 (d,  $J = 7.6$  Hz, 1H), 2.55 (dd,  $J = 15.2, 7.6$  Hz, 1H), 2.36 (t,  $J = 12.1$  Hz, 1H), 1.99-1.74 (m, 5H), 1.38 - 1.12 (m, 11H), 1.11- 0.95 (m, 3H), 0.89 (dt,  $J = 10.9, 7.2$  Hz, 3H).  $^{13}\text{C}$  NMR (101 MHz,  $\text{CDCl}_3$ )  $\delta$  174.0, 149.8, 147.6, 146.1, 143.9, 142.4, 132.9, 132.1, 132.0, 131.2, 131.1, 130.8, 130.6, 129.7, 129.6, 128.3, 127.9, 127.3, 126.9, 44.6, 44.5, 39.9, 39.8, 37.1, 37.0, 34.4, 34.1, 33.7, 33.5, 28.8, 20.2, 20.1, 15.4, 15.2, 14.6, 14.5. HRMS (ESI) *calcd.* for ( $\text{C}_{26}\text{H}_{32}\text{O}_2\text{-H}$ ): 375.2324, *found*: 375.2325. IR (KBr): 3500-2900 (br), 1745.7, 1677.8, 1605.2, 1413.8, 1414.2, 1262.2, 1176.9, 827.5, 715.9, 570.7, 524.5, 445.6  $\text{cm}^{-1}$ .

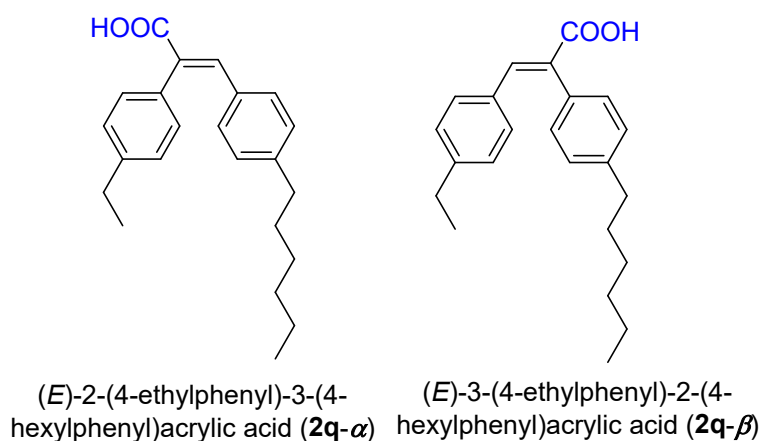

White solid, m.p. 75-78°C. The  $\alpha/\beta$  mixture cannot be separated (**2q**,  $\alpha:\beta=54:46$ ).  $^1\text{H}$  NMR (400 MHz,  $\text{CDCl}_3$ )  $\delta$  7.89 (s, 1H), 7.24 - 7.12 (m, 5H), 6.99 (d,  $J = 1.1$  Hz, 4H), 2.74 - 2.45 (m, 5H), 1.69 - 1.48 (m, 3H),

1.29 (dd,  $J = 18.0, 10.4$  Hz, 10H), 1.17 (t,  $J = 7.6$  Hz, 2H), 0.94 – 0.79 (m, 4H).  $^{13}\text{C}$  NMR (101 MHz,  $\text{CDCl}_3$ )  $\delta$  174.0, 146.1, 144.9, 143.9, 142.7, 142.4, 132.8, 131.9, 131.1, 131.1, 130.8, 130.7, 129.7, 129.6, 128.9, 128.4, 128.3, 127.9, 35.9, 31.8, 31.7, 31.3, 31.1, 29.1, 28.8, 22.8, 22.7, 15.4, 15.2, 14.2, 14.1. HRMS (ESI) *calcd.* for ( $\text{C}_{23}\text{H}_{28}\text{O}_2\text{-H}$ ): 335.2011, *found*: 335.2019. IR (KBr): 3100-2800(br), 1681.3, 1604.9, 1508.86, 1456.94, 1418.2, 1268.7, 1213.5, 1182.9, 1116.2, 997.9, 833.1, 736.2, 569.2  $\text{cm}^{-1}$ .

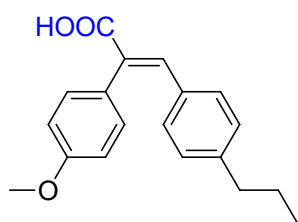

(*E*)-2-(4-methoxyphenyl)-3-(4-propylphenyl)acrylic acid **2r- $\alpha$**

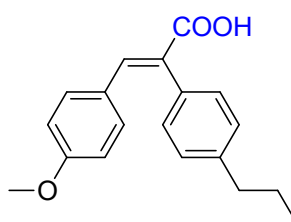

(*E*)-3-(4-methoxyphenyl)-2-(4-propylphenyl)acrylic acid **2r- $\beta$**

White solid, m.p. 172-174°C. The  $\alpha/\beta$  mixture cannot be separated (**2r**,  $\alpha:\beta=77:23$ ).

$^1\text{H}$  NMR (400 MHz,  $\text{CDCl}_3$ )  $\delta$  11.75 (s, 1H), 7.89 (d,  $J = 6.1$  Hz, 1H), 7.23 – 7.11 (m, 3H), 7.03-7.00 (q,  $J = 8.0$  Hz, 5H), 6.92 (d,  $J = 8.4$  Hz, 2H), 6.68 (d,  $J = 8.5$  Hz, 1H), 3.84 (s, 3H), 3.75 (s, 1H), 2.62 (t,  $J = 7.5$  Hz, 1H), 2.51 (t,  $J = 7.5$  Hz, 2H), 1.68 (dd,  $J = 14.8, 7.4$  Hz, 1H), 1.57 (dt,  $J = 14.3, 7.2$  Hz, 2H), 0.96 (t,  $J = 7.2$  Hz, 1H), 0.89 (t,  $J = 7.2$  Hz, 3H).  $^{13}\text{C}$  NMR (101 MHz,  $\text{CDCl}_3$ )  $\delta$  173.9, 159.4, 144.7, 142.5, 132.8, 132.1, 131.2, 131.0, 130.3, 129.7, 129.0, 128.6, 127.8, 114.3, 113.8, 55.3, 38.0, 24.3, 13.9. HRMS (ESI) *calcd.* for ( $\text{C}_{19}\text{H}_{20}\text{O}_3\text{-H}$ ): 295.1334, *found*: 295.1340. IR (KBr): 3000-2837 (br), 1675.0, 1609.9, 1502.5, 1416.7, 1258.4, 1236.7, 1179.2, 1035.9, 928.4, 827.6, 741.8, 684.3, 569.3, 426.1  $\text{cm}^{-1}$ .

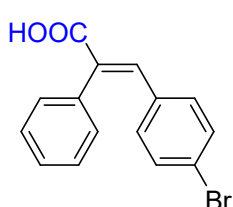

(*E*)-3-(4-bromophenyl)-2-phenylacrylic acid (**2s- $\alpha$** )

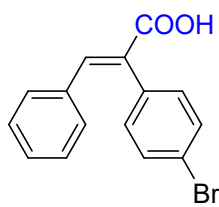

(*E*)-2-(4-bromophenyl)-3-phenylacrylic acid (**2s- $\beta$** )

White solid, m.p. 179-182 °C. The  $\alpha/\beta$  mixture cannot be separated (**2s**,  $\alpha:\beta=59:41$ ).  $^1\text{H}$  NMR (400 MHz,  $\text{CDCl}_3$ )  $\delta$  7.97 (s, 1H), 7.86 (s, 1H), 7.51 (d,  $J = 8.1$  Hz, 1H), 7.38 (s, 3H), 7.34 – 7.19 (m, 7H), 7.11 (dd,  $J = 16.4, 7.5$  Hz, 2H), 6.92 (d,  $J = 8.2$  Hz, 2H).  $^{13}\text{C}$  NMR (101 MHz,  $\text{CDCl}_3$ )  $\delta$  173.10, 172.94, 143.27, 141.25, 134.95, 134.26, 134.06, 133.30, 132.47, 132.32, 131.69, 130.94, 129.93, 129.76, 129.00, 128.59, 128.44, 124.06, 122.48. HRMS (ESI) *calcd.* for ( $\text{C}_{15}\text{H}_{11}\text{BrO}_2\text{-H}$ ): 300.9864, 300.9844, *found*: 300.9869, 300.9848. IR (KBr): 2926.1, 2847.1, 2349.5, 1678.5, 1654.9, 1481.5, 1387.1, 1259.9, 1079.3, 1000.3, 976.7, 913.1, 825.9, 707.9, 549.9, 486.3  $\text{cm}^{-1}$ .

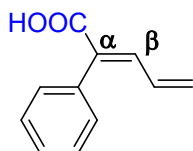

**(E)-2-phenylpenta-2,4-dienoic acid (2t- $\alpha$ )**

Colorless oil,  $^1\text{H}$  NMR (400 MHz,  $\text{CDCl}_3$ )  $\delta$  7.76 (s, 1H), 7.48-7.41 (d,  $J = 6.8$  Hz, 2H), 7.43-7.34 (m, 3H), 6.68-6.61 (dd,  $J = 17.8, 11.9$  Hz, 1H), 5.94 (d,  $J = 17.8$  Hz, 1H), 5.51 (d,  $J = 11.6$  Hz, 1H).  $^{13}\text{C}$  NMR (101 MHz,  $\text{CDCl}_3$ )  $\delta$  173.4, 141.9, 135.0, 130.4, 129.3, 129.0, 128.5, 121.8. HRMS (ESI) *calcd.* for ( $\text{C}_{11}\text{H}_{10}\text{O}_2\text{-H}$ ): 173.0603, *found*: 173.0600. IR (KBr): 3500-3000, 2358.2, 1683.3, 1447.7, 1266.4, 1214.8, 1154.9, 1006.4, 912.2, 755.3, 731.5, 695.4, 607.8  $\text{cm}^{-1}$ .

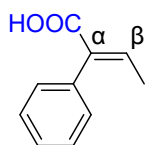

**(E)-2-phenylbut-2-enoic acid (2u- $\alpha$ )**

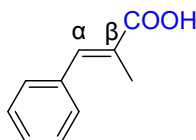

**(E)-2-methyl-3-phenylacrylic acid (2u- $\beta$ )**

White solid, m.p. 92-94 °C. The  $\alpha/\beta$  mixture cannot be separated (**2u**,  $\alpha:\beta=71:29$ ).  $^1\text{H}$  NMR (400 MHz,  $\text{CDCl}_3$ )  $\delta$  12.34 (s, 1H), 7.81 (s, 1H), 7.45-7.28 (m, 6H), 7.24 (s, 1H), 7.19 (d,  $J = 7.2$  Hz, 2H), 2.13 ( $\beta$ -product, s, 1H,  $\text{CH}_3$ ), 1.78 ( $\alpha$ -product, d,  $J = 7.1$  Hz, 3H,  $\text{CH}_3$ ).  $^{13}\text{C}$  NMR (101 MHz,  $\text{CDCl}_3$ )  $\delta$  174.5, 172.8, 142.9, 141.3, 135.7, 134.5, 129.9, 128.8, 128.5, 128.2, 127.7, 15.9, 13.8. HRMS (ESI) *calcd.* for ( $\text{C}_{10}\text{H}_{10}\text{O}_2\text{-H}$ ): 161.0603, *found*: 161.0608. IR (KBr): 3500-2500 (br), 1636.7, 1458.6, 1384.6, 1300.5, 1230.5, 1084.0, 791.2, 723.0, 618.5  $\text{cm}^{-1}$ .



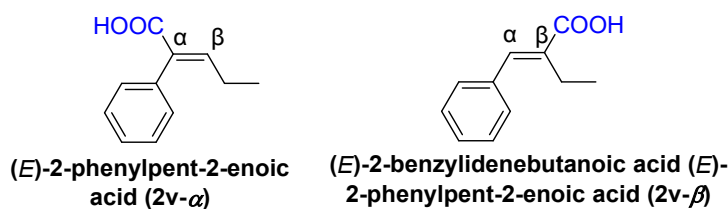

Colorless oil liquid. The  $\alpha/\beta$  mixture cannot be separated (**2v**,  $\alpha:\beta=71:29$ ).  $^1\text{H NMR}$  (400 MHz,  $\text{CDCl}_3$ )  $\delta$  7.76 (s, 1H), 7.41-7.32 (m, 4H), 7.22-7.16 (m, 3H), 2.56 ( $\beta$ -product, q,  $J = 7.5$  Hz, 1H,  $\text{CH}_2$ ), 2.18-2.08 ( $\alpha$ -product, m, 2H,  $\text{CH}_2$ ), 1.20 (s, 1H), 1.03 (t,  $J = 7.5$  Hz, 3H).  $^{13}\text{C NMR}$  (101 MHz,  $\text{CDCl}_3$ )  $\delta$  174.1, 172.8, 149.3, 140.8, 135.4, 134.7, 133.9, 132.7, 129.7, 129.4, 128.7, 128.5, 128.0, 127.6, 23.1, 20.5, 13.7, 13.2. HRMS (ESI) *calcd.* for ( $\text{C}_{11}\text{H}_{12}\text{O}_2\text{-H}$ ): 175.0759, *found*: 175.0766. IR (KBr): 3000-2700 (br), 1685.1, 1630.5, 1457.4, 1407.5, 1378.2, 1266.0, 1165.4, 1093.8, 1023.0, 749.4, 622.4  $\text{cm}^{-1}$ .

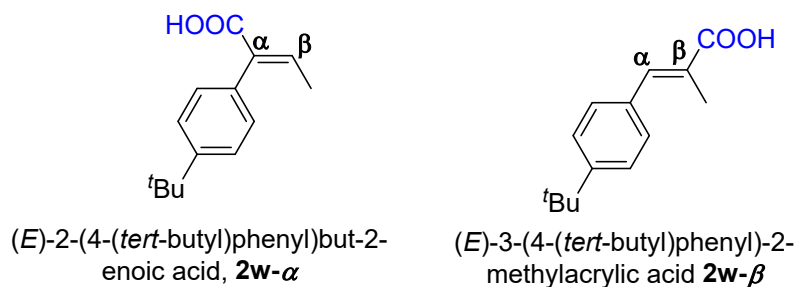

White solid, m.p. 103-106 °C. The  $\alpha/\beta$  mixture cannot be separated (**2w**,  $\alpha:\beta=59:41$ ).  $^1\text{H NMR}$  (400 MHz,  $\text{CDCl}_3$ )  $\delta$  7.78 (s, 1H), 7.44-7.38 (dd,  $J = 16.6$ , 8.1 Hz, 5H), 7.34-7.29 (m, 1H), 7.14 (d,  $J = 8.1$  Hz, 2H), 2.15 ( $\beta$ -product, s, 2H,  $\text{C}=\text{C}-\text{CH}_3$ ), 1.80 ( $\alpha$ -product, d,  $J = 7.2$  Hz, 3H,  $\text{C}=\text{C}-\text{CH}_3$ ), 1.33 (s, 16H).  $^{13}\text{C NMR}$  (101 MHz,  $\text{CDCl}_3$ )  $\delta$  174.8, 173.1, 152.2, 150.4, 142.6, 141.1, 134.1, 132.9, 131.4, 130.0, 129.6, 126.8, 125.5, 125.0, 34.9, 34.7, 31.4, 31.3, 16.0, 13.8. HRMS (ESI) *calcd.* for ( $\text{C}_{14}\text{H}_{18}\text{O}_2\text{-H}$ ): 217.1229, *found*: 217.1230. IR (KBr): 3000-2800 (br), 1667.2, 1518.5, 1425.1, 1362.5, 1268.1, 1198.3, 1127.6, 917.2, 822.8, 761.3, 698.7, 627.9, 565.3, 463.7  $\text{cm}^{-1}$ .

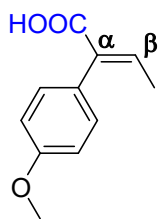

(*E*)-2-(4-methoxyphenyl)but-2-enoic acid **2x- $\alpha$**

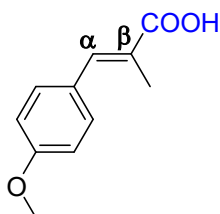

(*E*)-3-(4-methoxyphenyl)-2-methylacrylic acid **2x- $\beta$**

White solid, m.p. 123-126 °C. The  $\alpha/\beta$  mixture cannot be separated (**2x**,  $\alpha$ : $\beta$ =57:43).  $^1\text{H}$  NMR (400 MHz,  $\text{CDCl}_3$ )  $\delta$  11.8 (s, 1H), 7.77 (s, 1H), 7.42 (d,  $J$  = 8.7 Hz, 2H), 7.29 (d,  $J$  = 7.2 Hz, 1H), 7.13 (d,  $J$  = 8.6 Hz, 2H), 6.93 (t,  $J$  = 8.0 Hz, 4H), 3.84 (s, 2H), 3.82 (s, 3H), 2.14 ( $\beta$ -product, s, 2H, C=C-CH<sub>3</sub>), 1.79 ( $\alpha$ -product, d,  $J$  = 7.2 Hz, 3H, C=C-CH<sub>3</sub>).  $^{13}\text{C}$  NMR (101 MHz,  $\text{CDCl}_3$ )  $\delta$  174.8, 173.1, 160.1, 159.1, 142.5, 141.0, 138.8, 133.8, 131.9, 131.1, 129.2, 128.3, 126.7, 125.2, 114.0, 113.7, 55.4, 55.3, 15.9, 13.8. HRMS (ESI) *calcd.* for ( $\text{C}_{11}\text{H}_{12}\text{O}_3$ -H): 191.0708, *found*: 191.0706. IR (KBr): 3100-2500 (br), 1671.5, 1603.2, 1513.3, 1416.7, 1281.0, 1246.9, 1178.7, 1026.3, 918.9, 828.2, 799.9, 754.9, 731.6, 635.9, 567.7, 533.6, 476.9  $\text{cm}^{-1}$ .

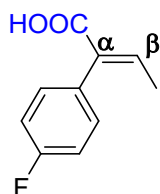

(*E*)-2-(4-fluorophenyl)but-2-enoic acid **2y- $\alpha$**

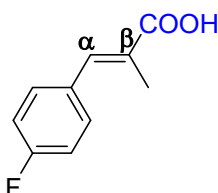

(*E*)-3-(4-fluorophenyl)-2-methylacrylic acid **2y- $\beta$**

White solid, m.p. 120-123 °C. The  $\alpha/\beta$  mixture cannot be separated (**2y**,  $\alpha$ : $\beta$ =57:43).  $^1\text{H}$  NMR (400 MHz,  $\text{CDCl}_3$ )  $\delta$  11.42 (s, 1H), 7.78 (s, 1H), 7.46 – 7.39 (m, 2H), 7.35 (dd,  $J$  = 14.4, 7.1 Hz, 1H), 7.21 – 7.14 (m, 1H), 7.09 (dd,  $J$  = 17.7, 8.9 Hz, 3H), 2.12 ( $\beta$ -product, s, 3H, CH<sub>3</sub>), 1.79 ( $\alpha$ -product, d,  $J$  = 7.1 Hz, 2H, CH<sub>3</sub>).  $^{13}\text{C}$  NMR (101 MHz,  $\text{CDCl}_3$ )  $\delta$  174.4, 172.7, 163.8 (d,  $J^{\text{F}}$  = 49.7 Hz), 161.4 (d,  $J^{\text{F}}$  = 46.4 Hz), 143.5, 140.1, 132.6 (d,  $J^{\text{F}}$  = 158.6 Hz), 131.9 (d,  $J^{\text{F}}$  = 8.3 Hz), 131.7 (d,  $J^{\text{F}}$  = 8.0 Hz), 130.4 (dd,  $J^{\text{F}}$  = 9.0, 5.7 Hz), 115.7 (d,  $J^{\text{F}}$  = 21.7 Hz), 115.3 (d,  $J^{\text{F}}$  = 21.5 Hz). HRMS (ESI) *calcd.* for ( $\text{C}_{10}\text{H}_9\text{FO}_2$ -H): 179.0508, *found*: 179.0507. IR

(KBr): 1663.7, 1625.3, 1505.1, 1422.7, 1292.8, 1220.8, 1158.0, 936.6, 835.3, 738.9, 627.8, 526.6, 435.1  $\text{cm}^{-1}$ .

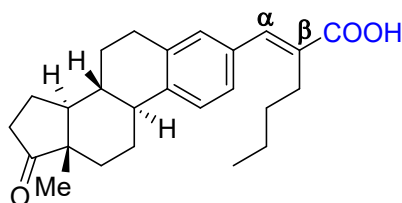

(*E*)-2-(((8*R*,9*S*,13*S*,14*S*)-13-methyl-17-oxo-7,8,9,11,12,13,14,15,16,17-decahydro-6*H*-cyclopenta[*a*]phenanthren-3-yl)methylene)hexanoic acid (**2aa- $\beta$** )

White solid. m.p. 104-106 °C.  $^1\text{H}$  NMR (400 MHz,  $\text{CDCl}_3$ )  $\delta$  7.74 (s, 1H), 7.34 (d,  $J = 8.1$  Hz, 1H), 7.23 (t,  $J = 9.5$  Hz, 1H), 7.16 (s, 1H), 2.94 (d,  $J = 4.8$  Hz, 2H), 2.55 – 1.96 (m, 9H), 1.65 – 1.37 (m, 10H), 0.93 (s, 6H).  $^{13}\text{C}$  NMR (101 MHz,  $\text{CDCl}_3$ )  $\delta$  221.0, 174.3, 140.9, 136.8, 133.2, 132.3, 130.5, 127.1, 125.7, 50.6, 48.1, 44.6, 38.2, 36.0, 32.1, 31.7, 29.5, 29.0, 26.6, 25.8, 22.5, 21.7, 14.2, 14.0.

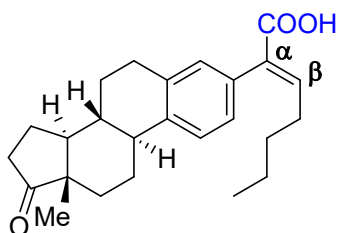

(*E*)-2-(((8*R*,9*S*,13*S*,14*S*)-13-methyl-17-oxo-7,8,9,11,12,13,14,15,16,17-decahydro-6*H*-cyclopenta[*a*]phenanthren-3-yl)methylene)hept-2-enoic acid (**2aa- $\alpha$** )

Orange oil.  $^1\text{H}$  NMR (400 MHz,  $\text{CDCl}_3$ )  $\delta$  7.27 (d,  $J = 8.1$  Hz, 1H), 7.17 (t,  $J = 7.3$  Hz, 1H), 7.02 – 6.84 (m, 2H), 2.91 (d,  $J = 4.7$  Hz, 2H), 2.55 – 1.97 (m, 9H), 1.65 – 1.25 (m, 10H), 0.92 (s, 3H), 0.86 (s, 3H).  $^{13}\text{C}$  NMR (101 MHz,  $\text{CDCl}_3$ )  $\delta$  221.2, 172.8, 148.0, 139.1, 136.1, 132.3, 130.3, 127.2, 125.1, 50.7, 48.1, 44.5, 38.1, 36.0, 31.7, 31.5, 29.9, 29.5, 28.5, 25.7, 22.5, 21.7, 14.1, 14.0.

HRMS (ESI) *calcd.* for ( $\text{C}_{25}\text{H}_{32}\text{O}_3\text{-H}$ ): 379.2273, *found*: 379.2279. IR (KBr): 3500-2800(br), 2238.5, 2075.6, 1737.8, 1683.3, 1633.1, 1499.9, 1455.2, 1274.8, 1260.42, 1118.7, 975.8, 822.7, 765.4, 676.5, 650.5, 580.6  $\text{cm}^{-1}$ .

## 11.2. X-Ray crystallographic data

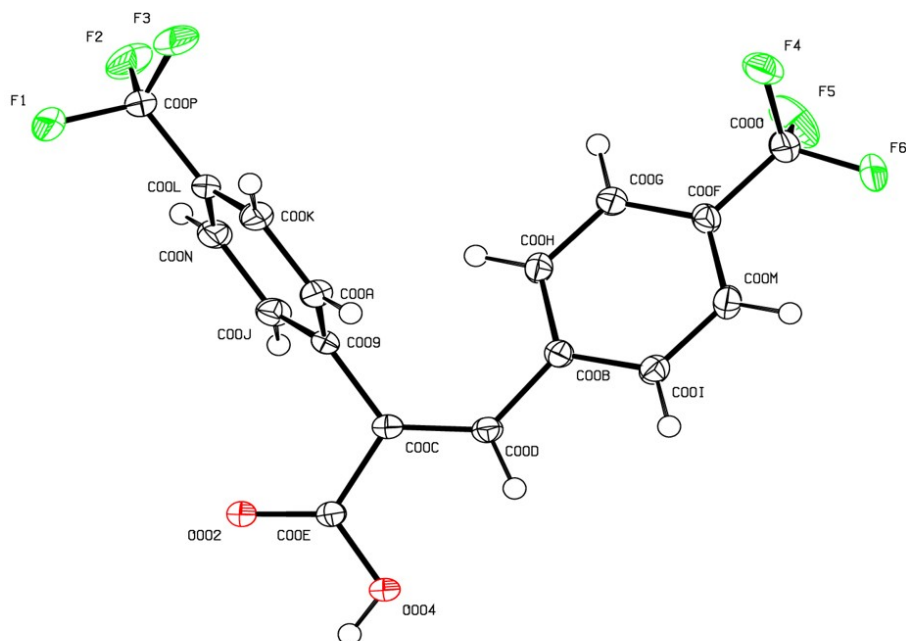

**(*E*)-2,3-bis(4-(trifluoromethyl)phenyl)acrylic acid (2i-X-ray)**  
**CCDC: 2082527**

**Table S2 Crystal data and structure refinement for 2i.**

| Identification code                | ( <i>E</i> )-2,3-bis(4-(trifluoromethyl)phenyl)acrylic acid (2i) |
|------------------------------------|------------------------------------------------------------------|
| Empirical formula                  | C <sub>17</sub> H <sub>10</sub> F <sub>6</sub> O <sub>2</sub>    |
| Formula weight                     | 360.25                                                           |
| Temperature/K                      | 100.00(10)                                                       |
| Crystal system                     | Monoclinic                                                       |
| Space group                        | P2 <sub>1</sub> /c                                               |
| a/Å                                | 5.5094(3)                                                        |
| b/Å                                | 15.2120(8)                                                       |
| c/Å                                | 18.2863(9)                                                       |
| α/°                                | 90                                                               |
| β/°                                | 96.429(6)                                                        |
| γ/°                                | 90                                                               |
| Volume/Å <sup>3</sup>              | 1522.92(14)                                                      |
| Z                                  | 4                                                                |
| ρ <sub>calc</sub> /cm <sup>3</sup> | 1.571                                                            |
| μ/mm <sup>-1</sup>                 | 0.151                                                            |
| F(000)                             | 728.0                                                            |
| Crystal size/mm <sup>3</sup>       | 0.22 × 0.15 × 0.14                                               |
| Radiation                          | MoKα (λ = 0.71073)                                               |
| 2θ range for data collection/°     | 7.242 to 60.778                                                  |

|                                                |                                                               |
|------------------------------------------------|---------------------------------------------------------------|
| Index ranges                                   | -7 ≤ h ≤ 7, -21 ≤ k ≤ 21, -26 ≤ l ≤ 22                        |
| Reflections collected                          | 10535                                                         |
| Independent reflections                        | 4010 [R <sub>int</sub> = 0.0294, R <sub>sigma</sub> = 0.0371] |
| Data/restraints/parameters                     | 4010/0/227                                                    |
| Goodness-of-fit on F <sup>2</sup>              | 1.073                                                         |
| Final R indexes [I ≥ 2σ (I)]                   | R <sub>1</sub> = 0.0404, wR <sub>2</sub> = 0.0977             |
| Final R indexes [all data]                     | R <sub>1</sub> = 0.0524, wR <sub>2</sub> = 0.1026             |
| Largest diff. peak/hole / e<br>Å <sup>-3</sup> | 0.37/-0.37                                                    |

**Table S3 Bond Lengths for (*E*)-2,3-bis(4-(trifluoromethyl)phenyl)acrylic acid (2i).**

| Atom | Atom | Length/Å   | Atom | Atom | Length/Å   |
|------|------|------------|------|------|------------|
| F4   | C00O | 1.3356(16) | C00B | C00H | 1.4014(18) |
| O002 | C00E | 1.2241(15) | C00B | C00I | 1.3979(17) |
| F1   | C00P | 1.3450(17) | C00C | C00D | 1.3447(17) |
| O004 | C00E | 1.3168(15) | C00C | C00E | 1.4902(16) |
| F6   | C00O | 1.3288(16) | C00F | C00G | 1.3912(18) |
| F5   | C00O | 1.3385(17) | C00F | C00M | 1.3859(19) |
| F3   | C00P | 1.3348(19) | C00F | C00O | 1.4975(17) |
| F2   | C00P | 1.336(2)   | C00G | C00H | 1.3844(18) |
| C009 | C00A | 1.3915(17) | C00I | C00M | 1.3898(18) |
| C009 | C00C | 1.4879(16) | C00J | C00N | 1.3868(19) |
| C009 | C00J | 1.3956(17) | C00K | C00L | 1.3889(19) |
| C00A | C00K | 1.3894(18) | C00L | C00N | 1.383(2)   |
| C00B | C00D | 1.4722(16) | C00L | C00P | 1.4999(18) |

**Table S4 Bond Angles for (*E*)-2,3-bis(4-(trifluoromethyl)phenyl)acrylic acid (2i).**

| Atom | Atom | Atom | Angle/°    | Atom | Atom | Atom | Angle/°    |
|------|------|------|------------|------|------|------|------------|
| C00A | C009 | C00C | 119.49(11) | C00N | C00J | C009 | 120.64(12) |
| C00A | C009 | C00J | 119.29(11) | C00L | C00K | C00A | 119.70(12) |
| C00J | C009 | C00C | 121.20(11) | C00K | C00L | C00P | 119.08(13) |
| C00K | C00A | C009 | 120.23(12) | C00N | C00L | C00K | 120.69(12) |
| C00H | C00B | C00D | 123.01(11) | C00N | C00L | C00P | 120.23(13) |
| C00I | C00B | C00D | 118.36(11) | C00F | C00M | C00I | 119.50(12) |
| C00I | C00B | C00H | 118.46(11) | C00L | C00N | C00J | 119.45(12) |
| C009 | C00C | C00E | 114.79(10) | F4   | C00O | F5   | 105.19(12) |

|                |               |           |            |
|----------------|---------------|-----------|------------|
| C00D C00C C009 | 126.15(11) F4 | C00O C00F | 112.78(10) |
| C00D C00C C00E | 119.05(11) F6 | C00O F4   | 106.45(11) |
| C00C C00D C00B | 128.96(11) F6 | C00O F5   | 107.45(11) |
| O002 C00E O004 | 123.32(11) F6 | C00O C00F | 113.23(12) |
| O002 C00E C00C | 121.33(11) F5 | C00O C00F | 111.24(11) |
| O004 C00E C00C | 115.33(10) F1 | C00P C00L | 112.25(11) |
| C00G C00F C00O | 118.32(12) F3 | C00P F1   | 106.28(14) |
| C00M C00F C00G | 120.27(12) F3 | C00P F2   | 106.49(12) |
| C00M C00F C00O | 121.35(12) F3 | C00P C00L | 112.35(12) |
| C00H C00G C00F | 120.09(12) F2 | C00P F1   | 106.26(12) |
| C00G C00H C00B | 120.56(12) F2 | C00P C00L | 112.72(13) |
| C00M C00I C00B | 121.10(12)    |           |            |

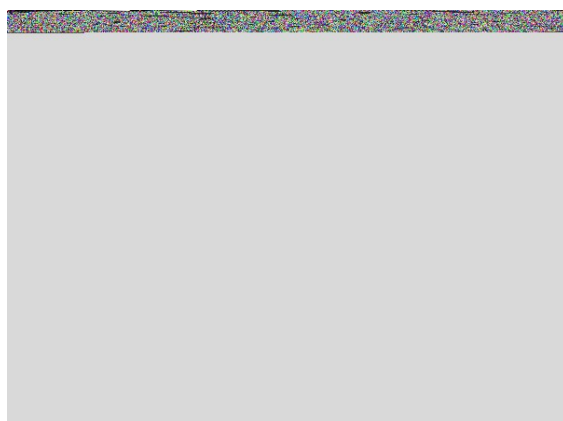

B'-X-ray (CCDC:2082526)

**Table S5 Crystal data and structure refinement for compound B'.**

|                       |                                                   |
|-----------------------|---------------------------------------------------|
| Identification code   | compound B'                                       |
| Empirical formula     | C <sub>27</sub> H <sub>26</sub> P <sub>4</sub> Pd |
| Formula weight        | 580.76                                            |
| Temperature/K         | 113.15                                            |
| Crystal system        | triclinic                                         |
| Space group           | P-1                                               |
| a/Å                   | 8.4671(5)                                         |
| b/Å                   | 10.5451(6)                                        |
| c/Å                   | 14.4131(7)                                        |
| α/°                   | 88.379(4)                                         |
| β/°                   | 80.098(4)                                         |
| γ/°                   | 73.608(5)                                         |
| Volume/Å <sup>3</sup> | 1215.92(12)                                       |
| Z                     | 2                                                 |

|                                                |                                                               |
|------------------------------------------------|---------------------------------------------------------------|
| $\rho_{\text{calc}}/\text{cm}^3$               | 1.586                                                         |
| $\mu/\text{mm}^{-1}$                           | 1.041                                                         |
| F(000)                                         | 588.0                                                         |
| Crystal size/ $\text{mm}^3$                    | $0.2 \times 0.18 \times 0.16$                                 |
| Radiation                                      | MoK $\alpha$ ( $\lambda = 0.71073$ )                          |
| 2 $\Theta$ range for data collection/ $^\circ$ | 4.028 to 52.74                                                |
| Index ranges                                   | $-10 \leq h \leq 10, -13 \leq k \leq 13, -18 \leq l \leq 17$  |
| Reflections collected                          | 12663                                                         |
| Independent reflections                        | 4961 [ $R_{\text{int}} = 0.0540, R_{\text{sigma}} = 0.0603$ ] |
| Data/restraints/parameters                     | 4961/0/289                                                    |
| Goodness-of-fit on $F^2$                       | 1.057                                                         |
| Final R indexes [ $I \geq 2\sigma(I)$ ]        | $R_1 = 0.0439, wR_2 = 0.1112$                                 |
| Final R indexes [all data]                     | $R_1 = 0.0536, wR_2 = 0.1177$                                 |
| Largest diff. peak/hole / $e \text{ \AA}^{-3}$ | 0.94/-0.69                                                    |

**Table S6 Bond Lengths for compound B'.**

| Atom | Atom | Length/ $\text{\AA}$ | Atom | Atom | Length/ $\text{\AA}$ |
|------|------|----------------------|------|------|----------------------|
| Pd1  | P1   | 2.2529(11)           | C8   | C9   | 1.380(8)             |
| Pd1  | P2   | 2.2445(11)           | C9   | C10  | 1.349(9)             |
| Pd1  | P3   | 2.3589(10)           | C10  | C11  | 1.354(8)             |
| Pd1  | P4   | 2.3558(11)           | C11  | C12  | 1.389(8)             |
| P1   | C1   | 1.814(5)             | C13  | C14  | 1.528(6)             |
| P1   | C7   | 1.816(5)             | C14  | C15  | 1.522(6)             |
| P1   | C13  | 1.834(5)             | C16  | C17  | 1.381(7)             |
| P2   | C15  | 1.823(4)             | C16  | C21  | 1.386(6)             |
| P2   | C16  | 1.816(4)             | C17  | C18  | 1.377(7)             |
| P2   | C22  | 1.814(5)             | C18  | C19  | 1.384(8)             |
| C1   | C2   | 1.397(7)             | C19  | C20  | 1.363(8)             |
| C1   | C6   | 1.379(7)             | C20  | C21  | 1.394(7)             |
| C2   | C3   | 1.386(7)             | C22  | C23  | 1.387(6)             |
| C3   | C4   | 1.384(8)             | C22  | C27  | 1.386(7)             |
| C4   | C5   | 1.375(8)             | C23  | C24  | 1.378(7)             |
| C5   | C6   | 1.399(7)             | C24  | C25  | 1.367(7)             |
| C7   | C8   | 1.374(7)             | C25  | C26  | 1.379(7)             |
| C7   | C12  | 1.370(7)             | C26  | C27  | 1.401(7)             |

**Table S7 Bond Angles for compound B'.**

| Atom | Atom | Atom | Angle/ $^\circ$ | Atom | Atom | Atom | Angle/ $^\circ$ |
|------|------|------|-----------------|------|------|------|-----------------|
| P1   | Pd1  | P3   | 177.99(4)       | C12  | C7   | P1   | 118.6(4)        |

|     |     |     |            |     |     |     |          |
|-----|-----|-----|------------|-----|-----|-----|----------|
| P1  | Pd1 | P4  | 91.36(4)   | C12 | C7  | C8  | 118.2(5) |
| P2  | Pd1 | P1  | 90.62(4)   | C7  | C8  | C9  | 119.8(5) |
| P2  | Pd1 | P3  | 87.68(4)   | C10 | C9  | C8  | 122.1(6) |
| P2  | Pd1 | P4  | 172.25(5)  | C9  | C10 | C11 | 118.4(5) |
| P4  | Pd1 | P3  | 90.47(4)   | C10 | C11 | C12 | 120.8(5) |
| C1  | P1  | Pd1 | 114.40(15) | C7  | C12 | C11 | 120.6(5) |
| C1  | P1  | C7  | 106.6(2)   | C14 | C13 | P1  | 117.9(3) |
| C1  | P1  | C13 | 102.6(2)   | C15 | C14 | C13 | 116.2(4) |
| C7  | P1  | Pd1 | 109.42(15) | C14 | C15 | P2  | 111.3(3) |
| C7  | P1  | C13 | 107.2(2)   | C17 | C16 | P2  | 121.1(3) |
| C13 | P1  | Pd1 | 115.92(15) | C17 | C16 | C21 | 119.2(4) |
| C15 | P2  | Pd1 | 116.54(15) | C21 | C16 | P2  | 119.5(4) |
| C16 | P2  | Pd1 | 114.74(15) | C18 | C17 | C16 | 120.4(5) |
| C16 | P2  | C15 | 102.7(2)   | C17 | C18 | C19 | 120.0(5) |
| C22 | P2  | Pd1 | 109.41(14) | C20 | C19 | C18 | 120.2(5) |
| C22 | P2  | C15 | 105.2(2)   | C19 | C20 | C21 | 119.9(5) |
| C22 | P2  | C16 | 107.4(2)   | C16 | C21 | C20 | 120.1(5) |
| C2  | C1  | P1  | 118.2(4)   | C23 | C22 | P2  | 121.5(4) |
| C6  | C1  | P1  | 121.9(4)   | C27 | C22 | P2  | 119.1(4) |
| C6  | C1  | C2  | 119.8(4)   | C27 | C22 | C23 | 119.2(4) |
| C3  | C2  | C1  | 120.4(5)   | C24 | C23 | C22 | 120.4(5) |
| C4  | C3  | C2  | 119.0(5)   | C25 | C24 | C23 | 120.4(5) |
| C5  | C4  | C3  | 121.2(5)   | C24 | C25 | C26 | 120.5(5) |
| C4  | C5  | C6  | 119.7(5)   | C25 | C26 | C27 | 119.4(5) |
| C1  | C6  | C5  | 119.7(5)   | C22 | C27 | C26 | 120.1(5) |
| C8  | C7  | P1  | 123.2(4)   |     |     |     |          |



### 11.3. NMR Charts

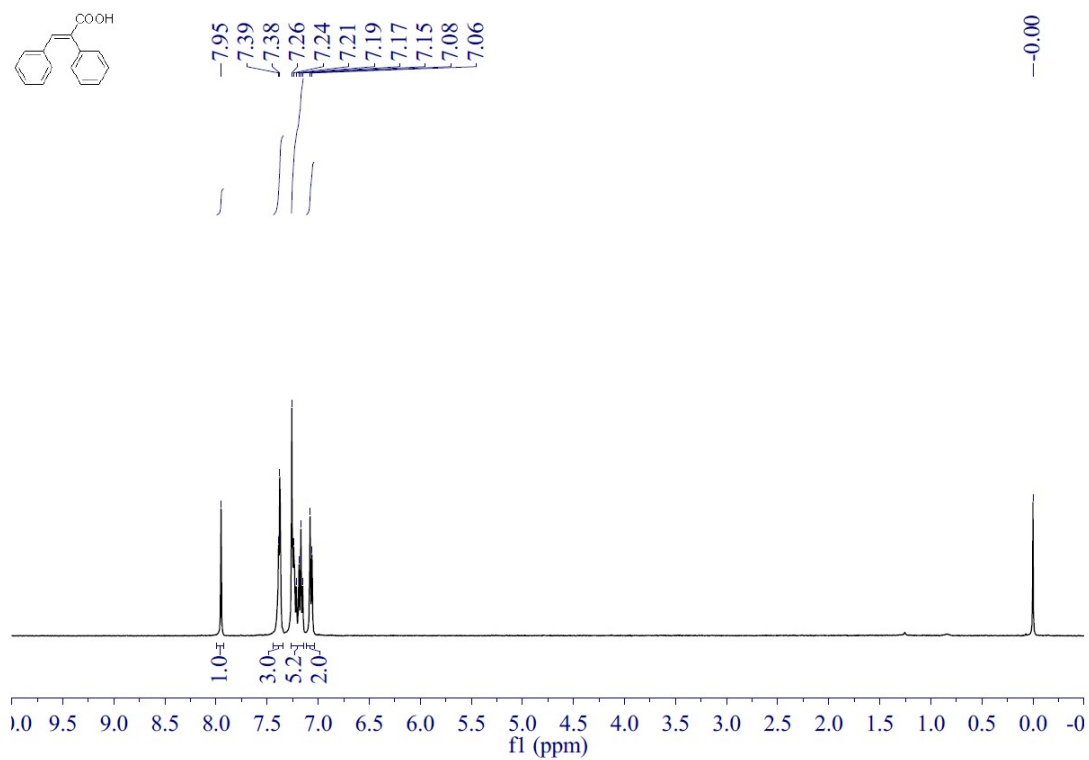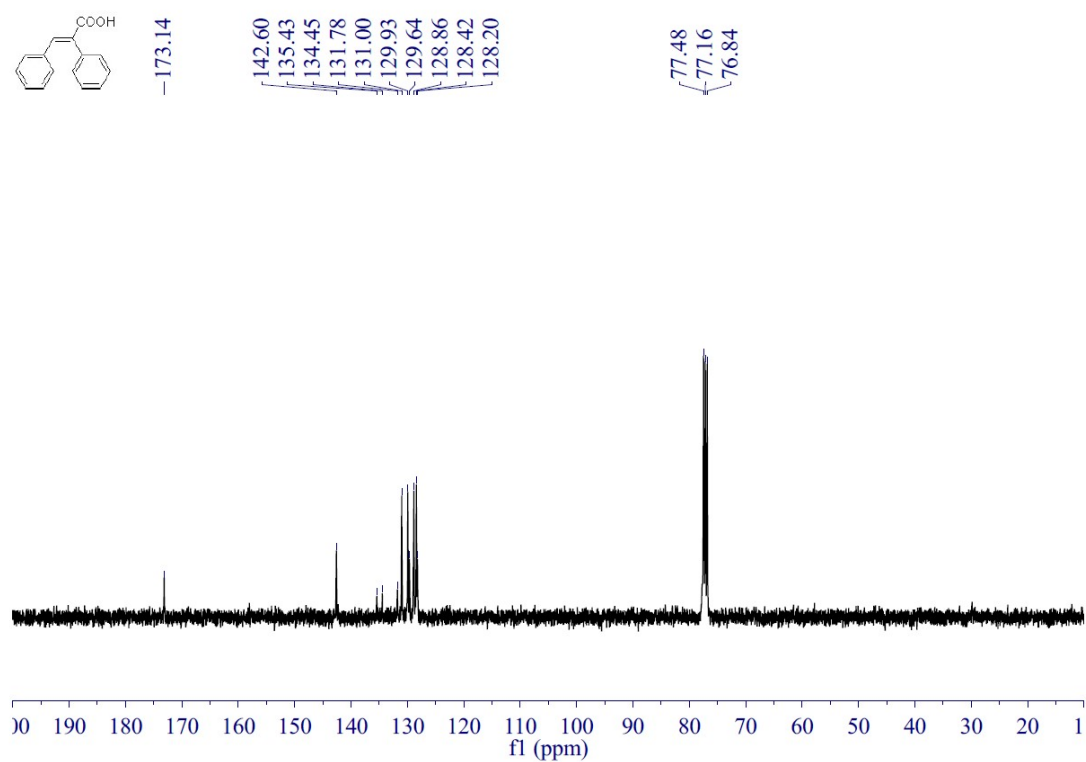

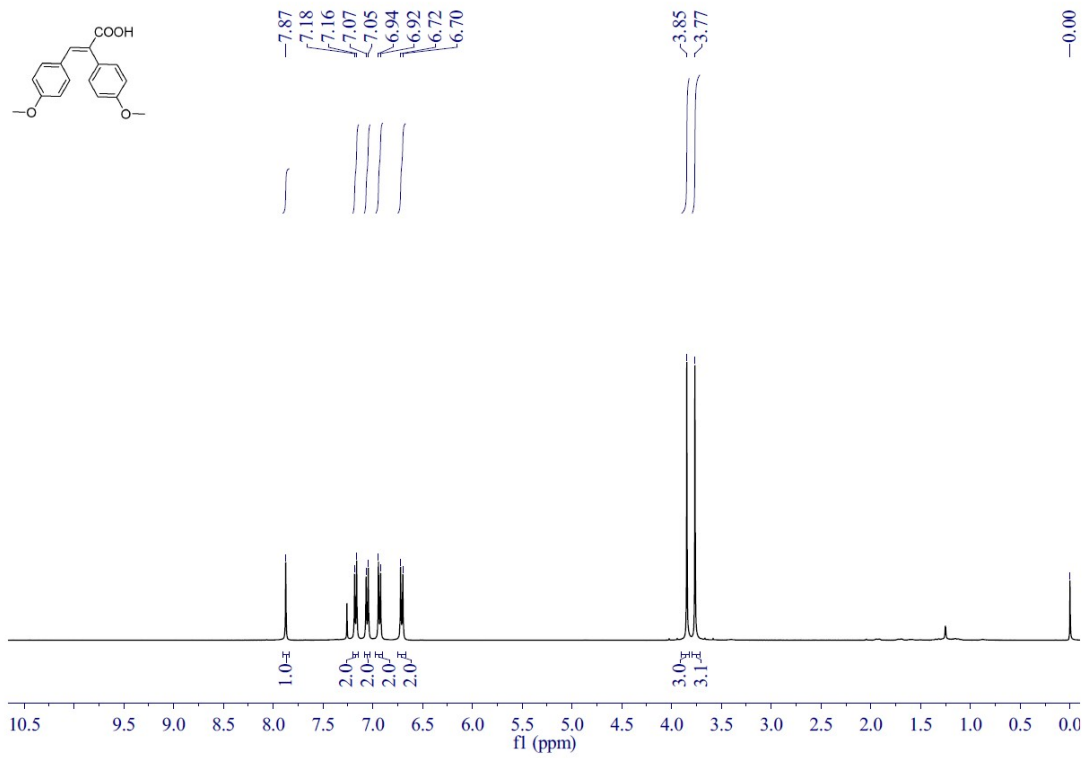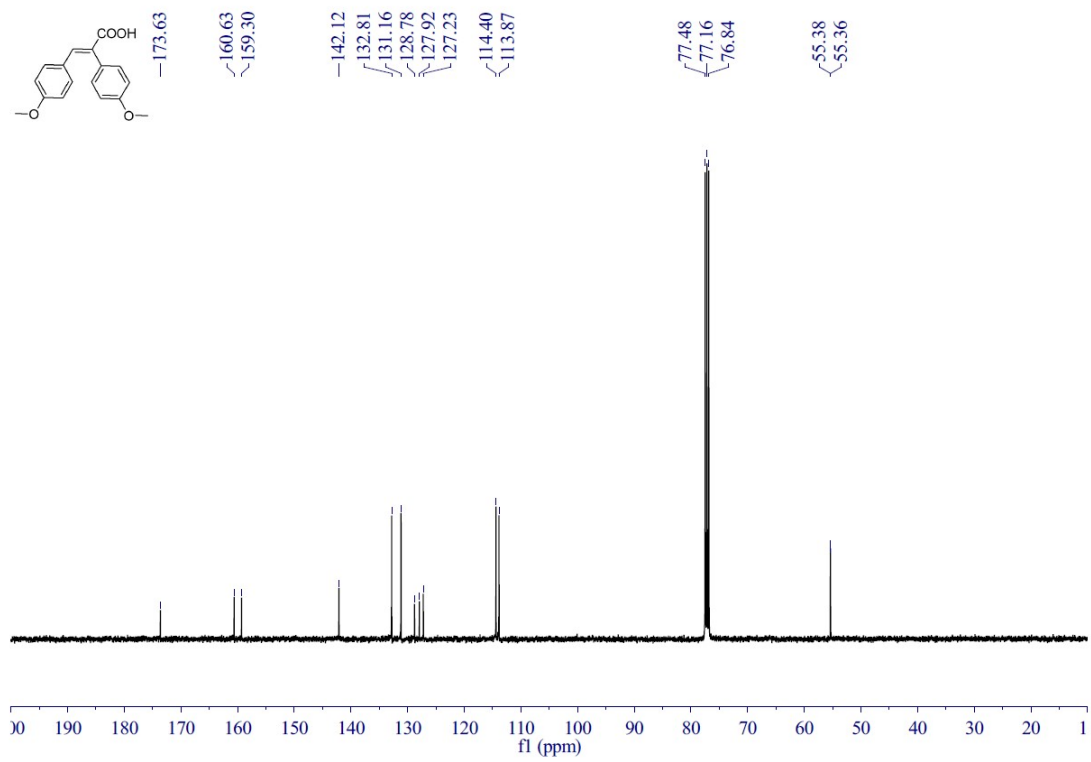

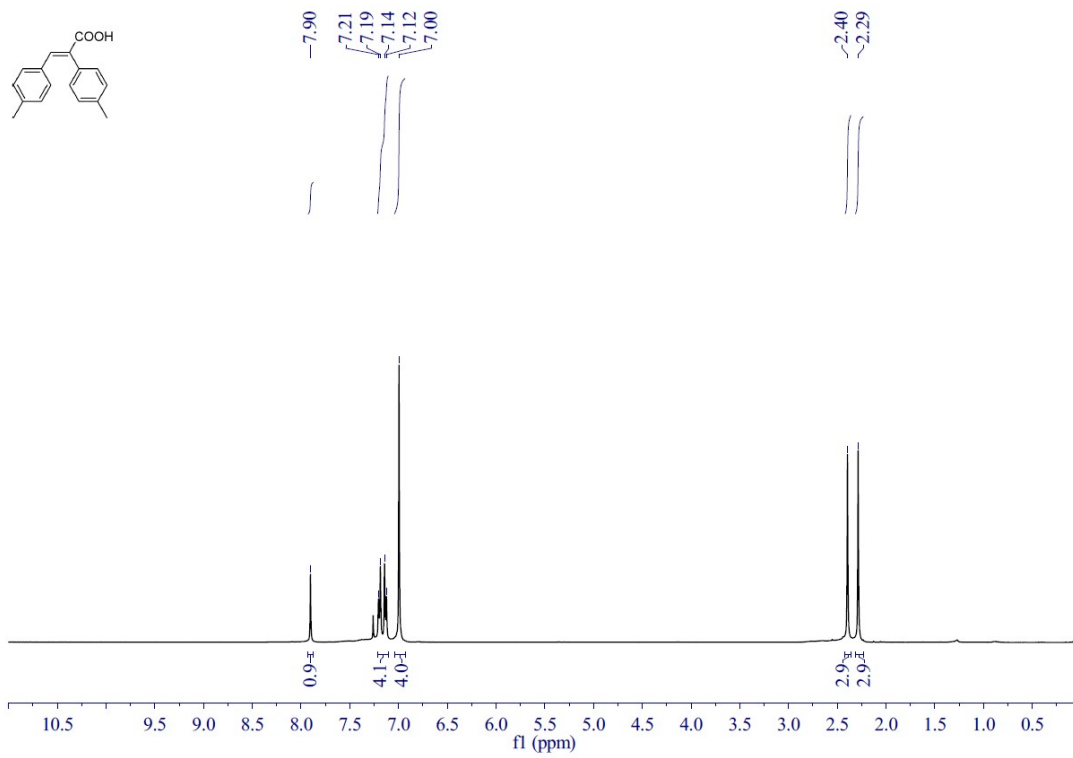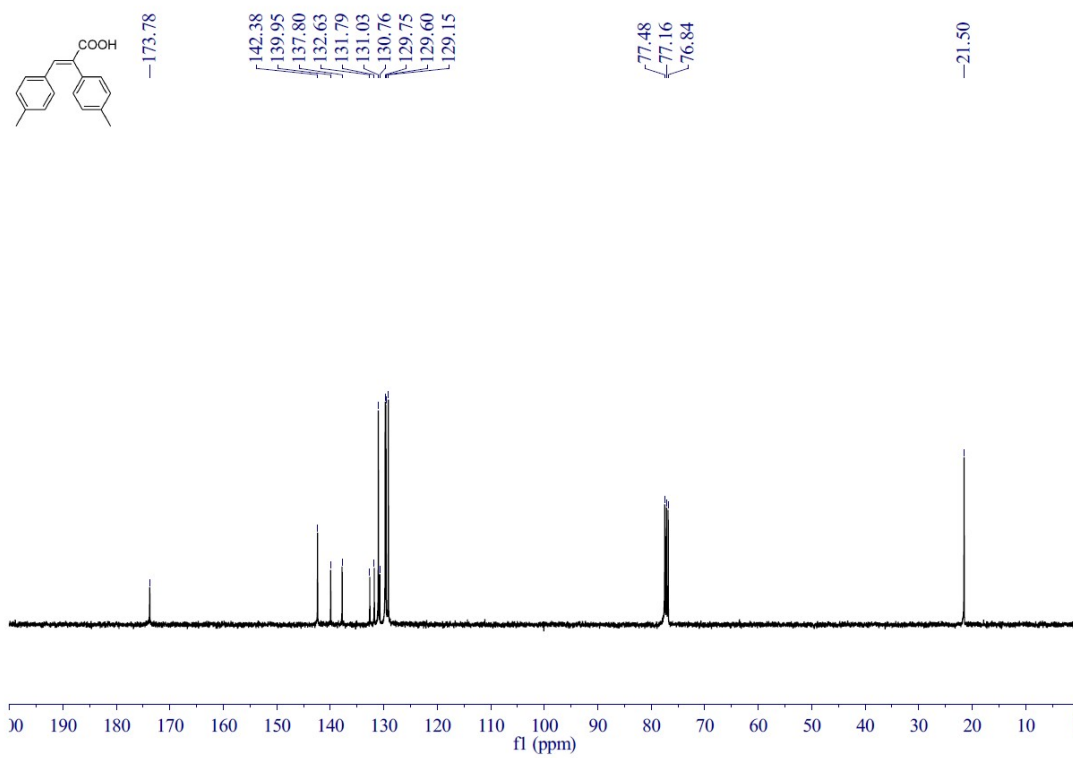

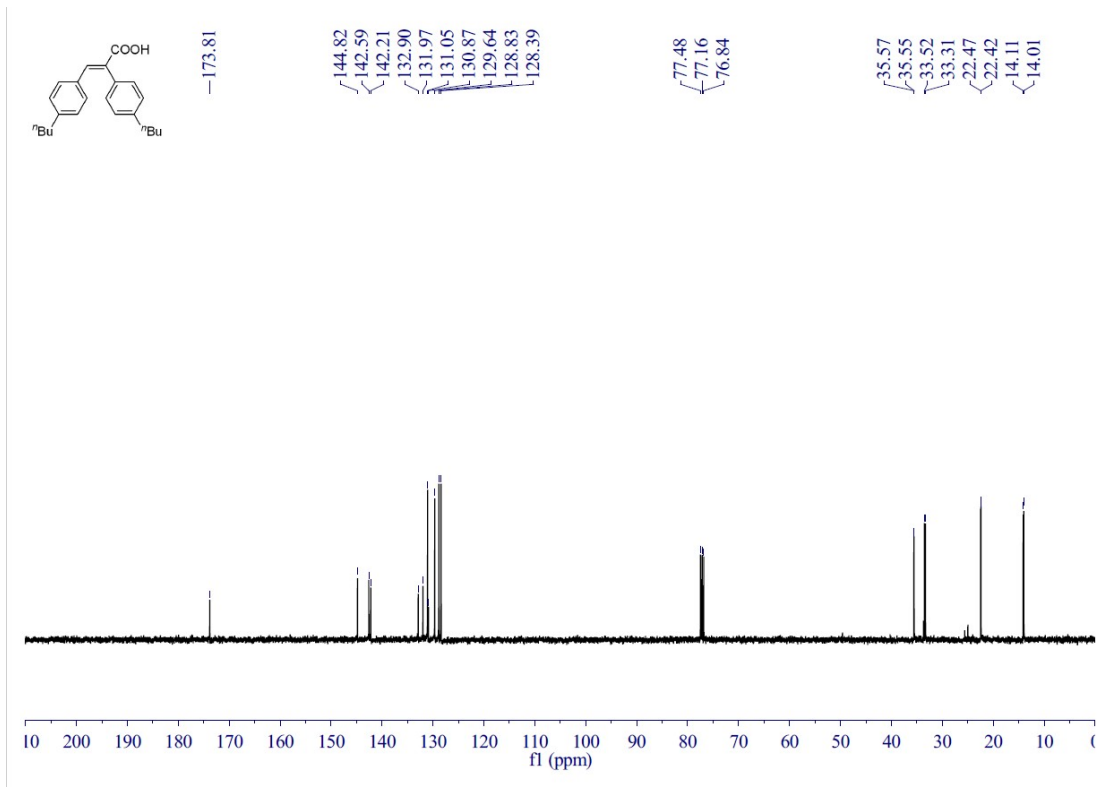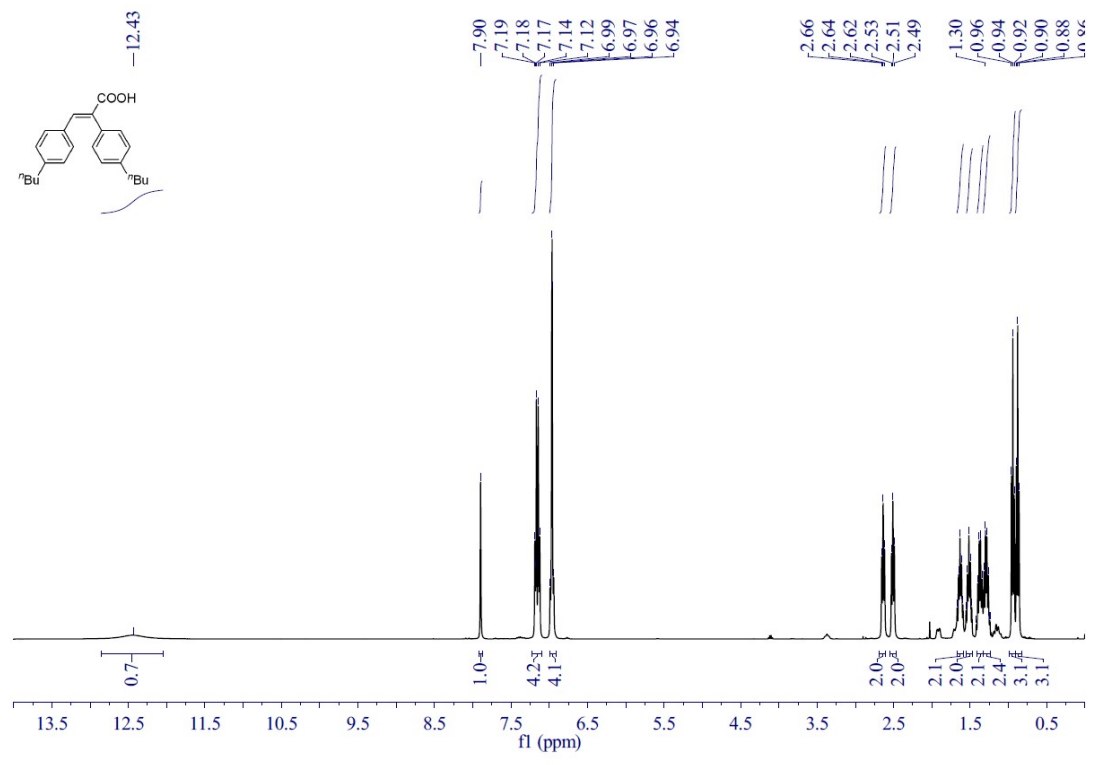

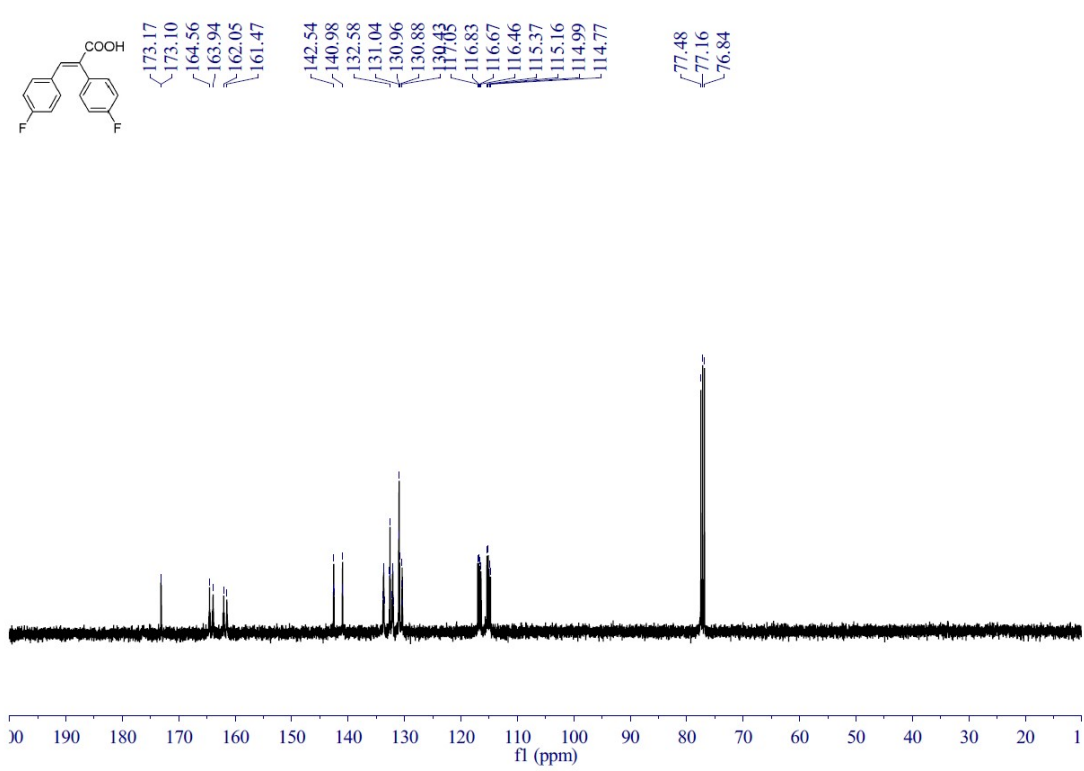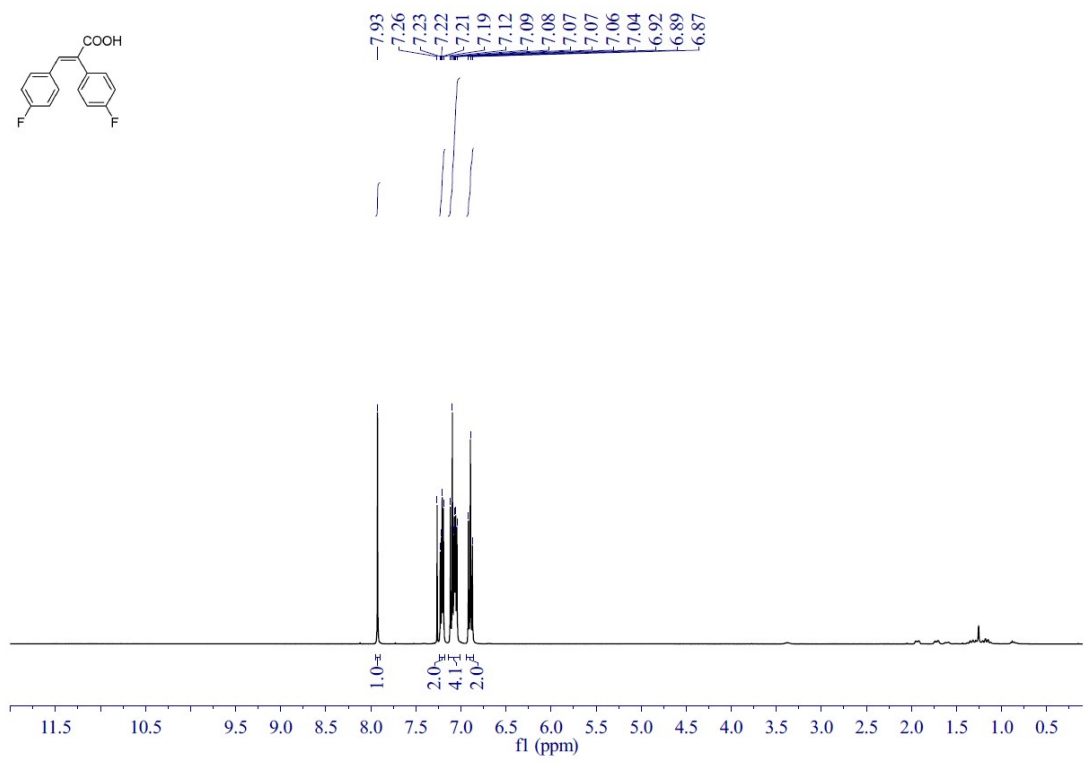

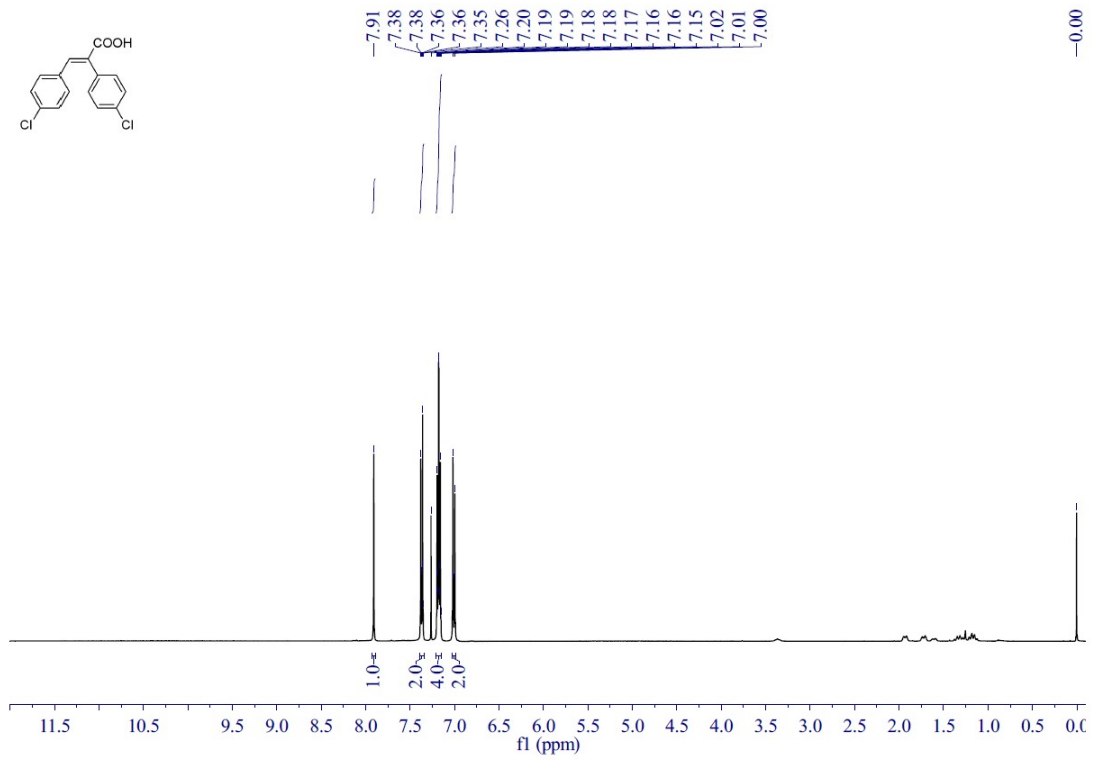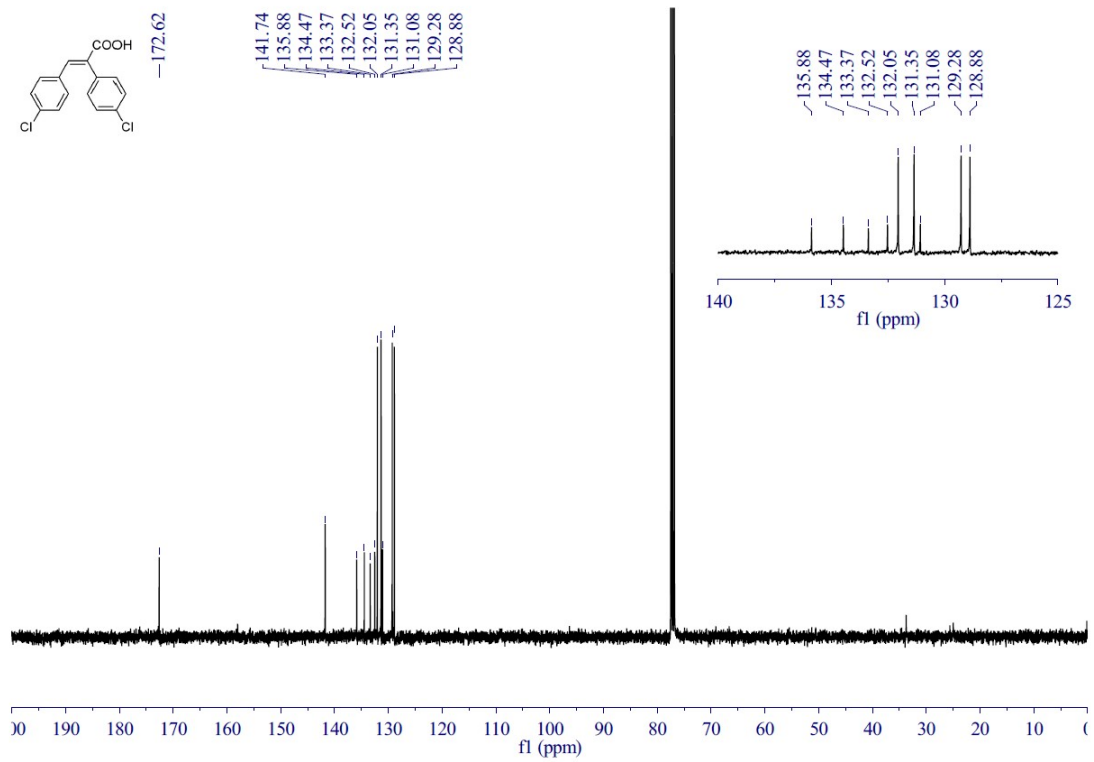

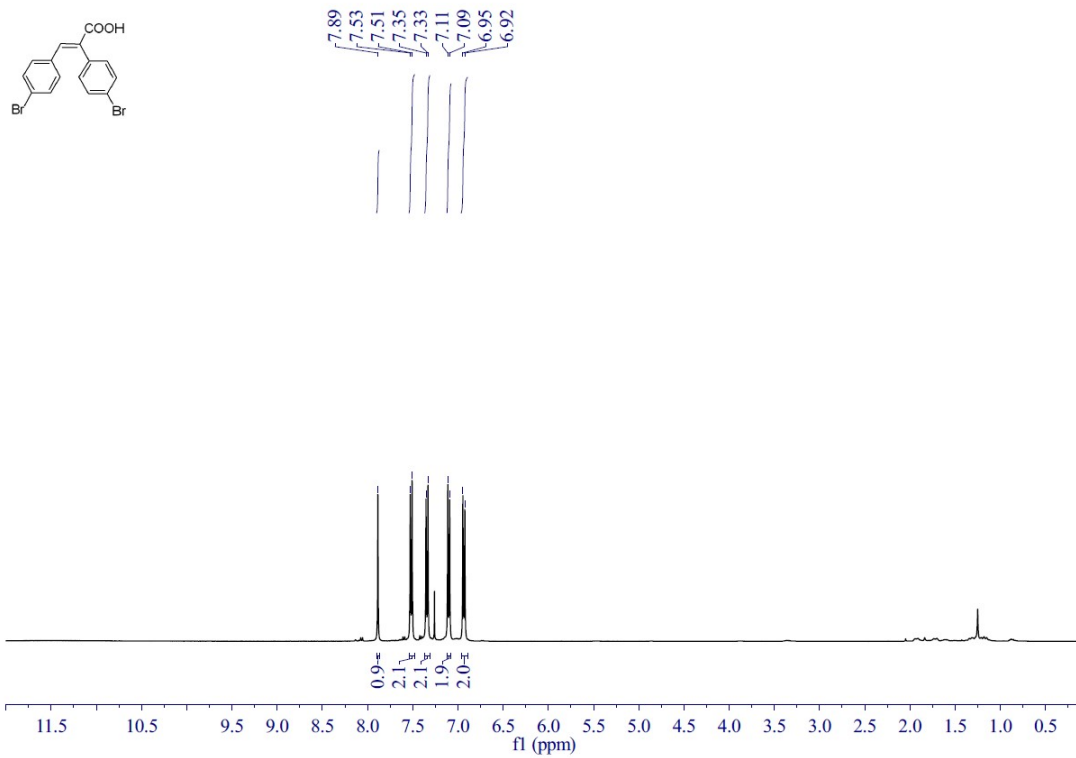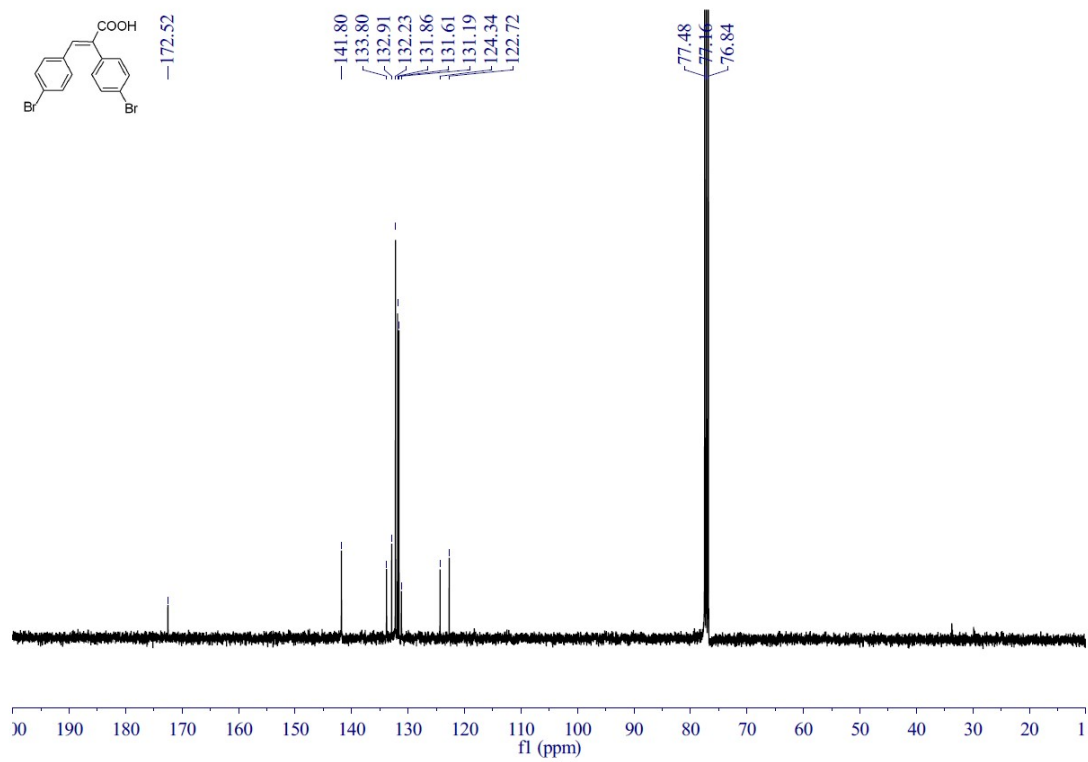

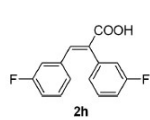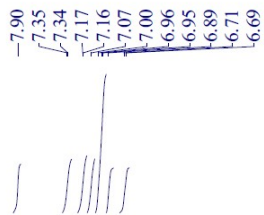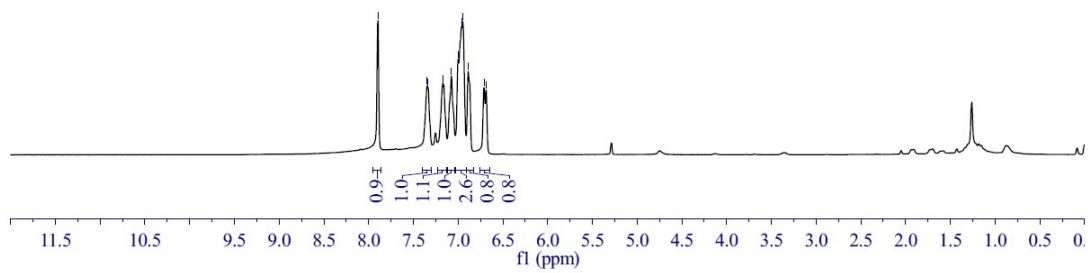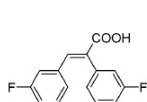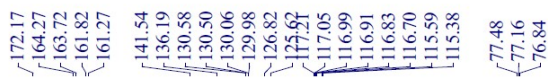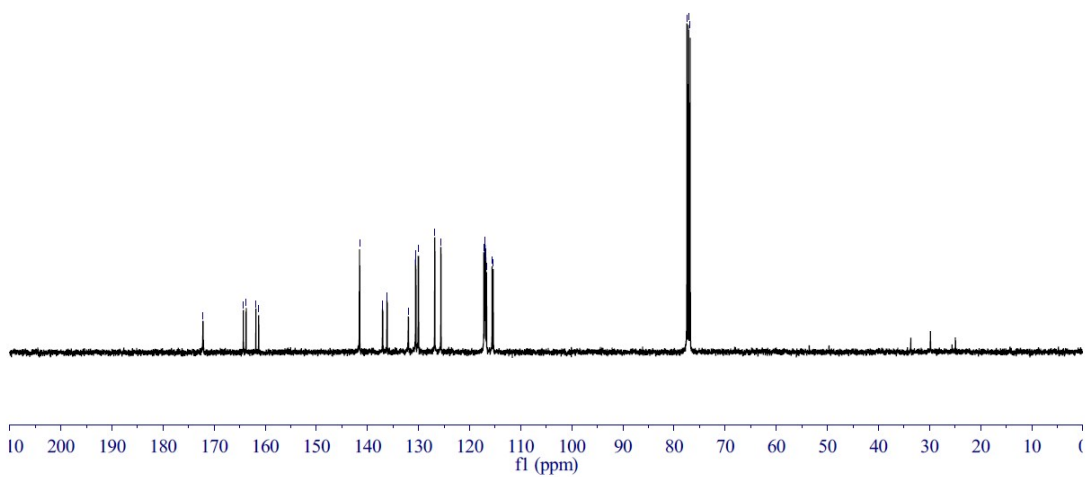



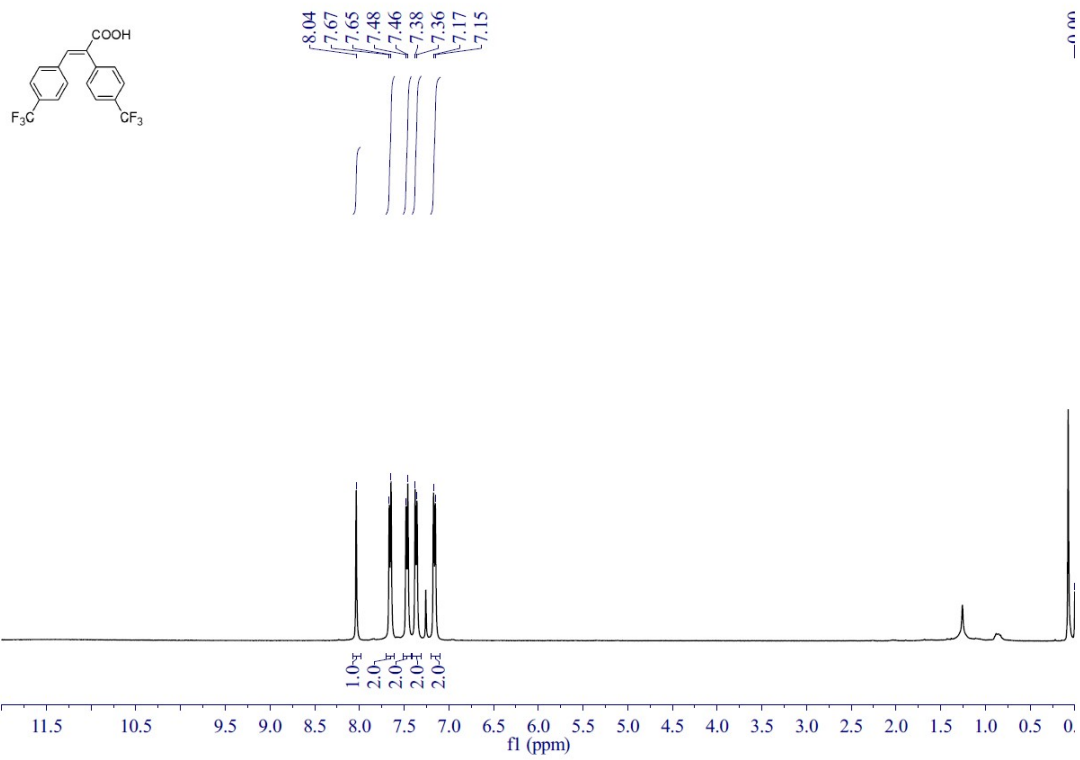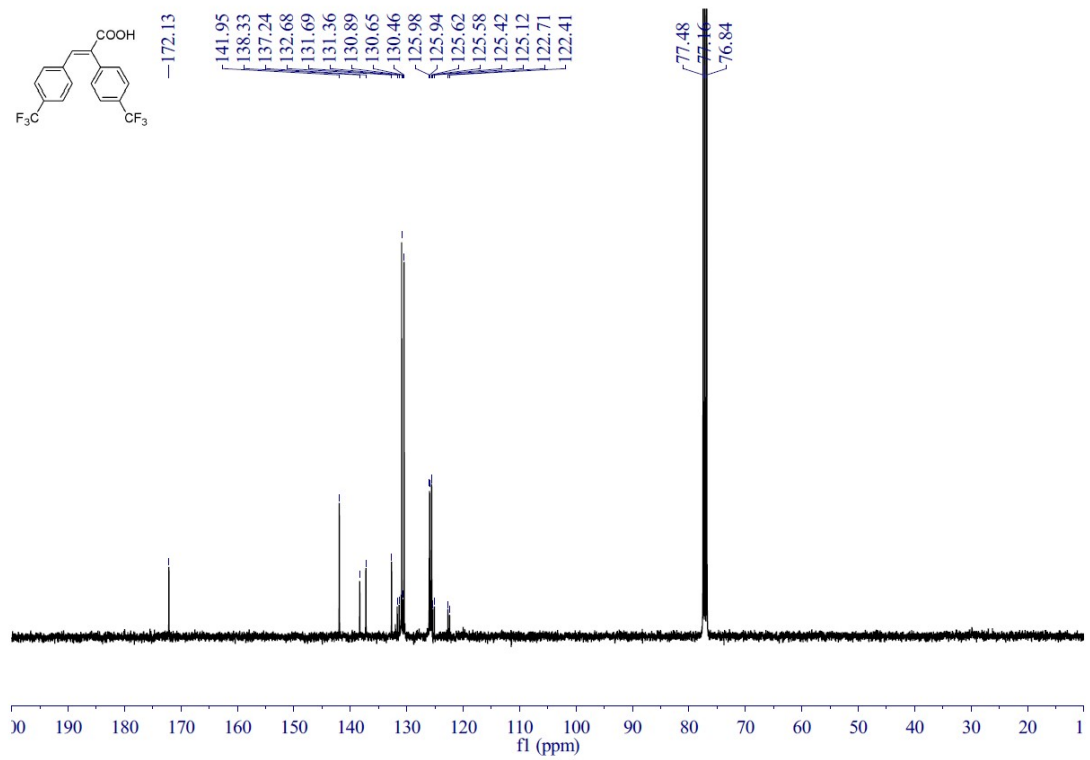

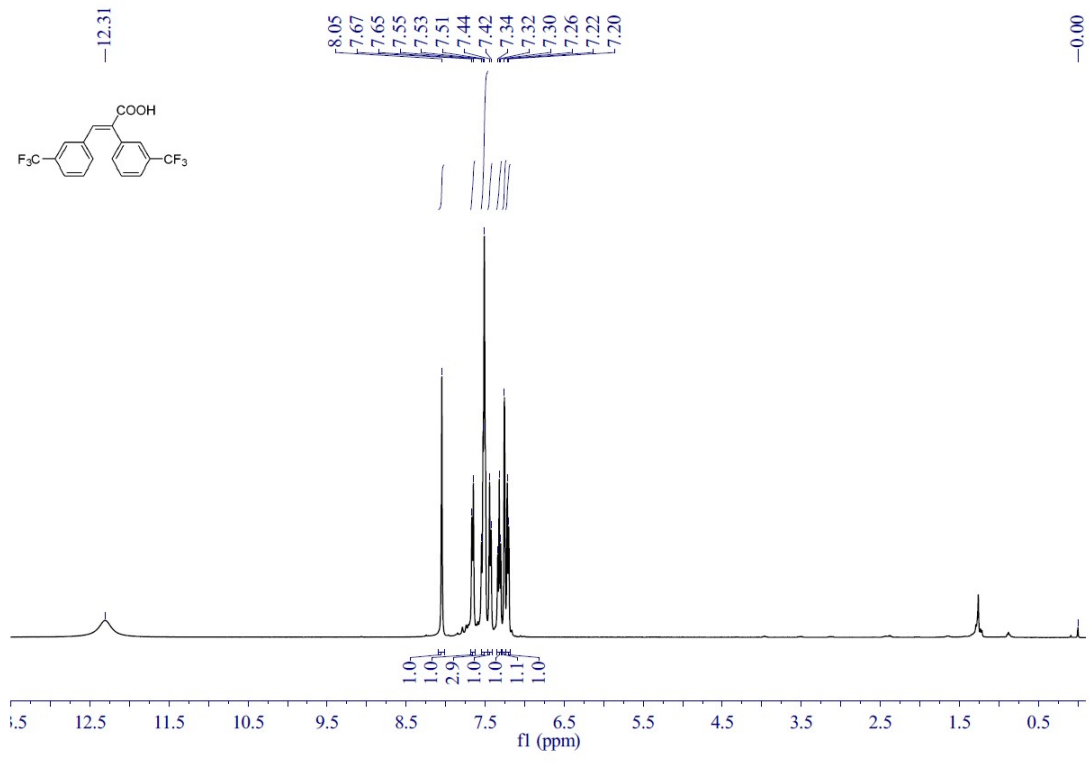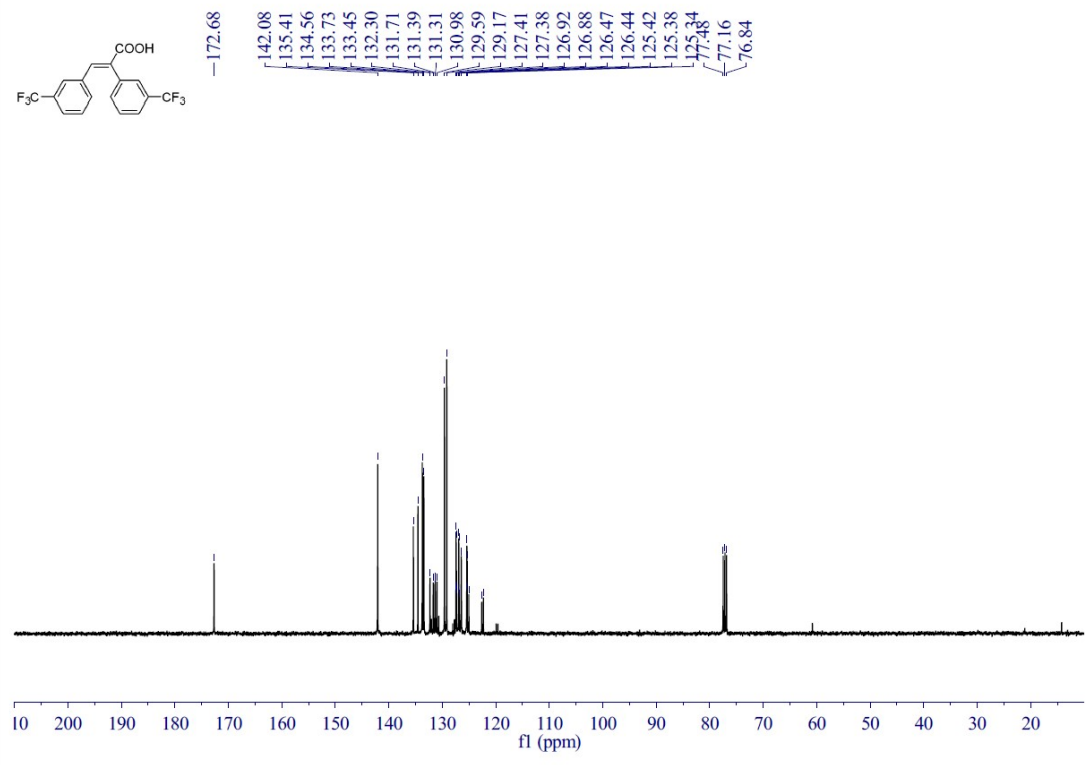

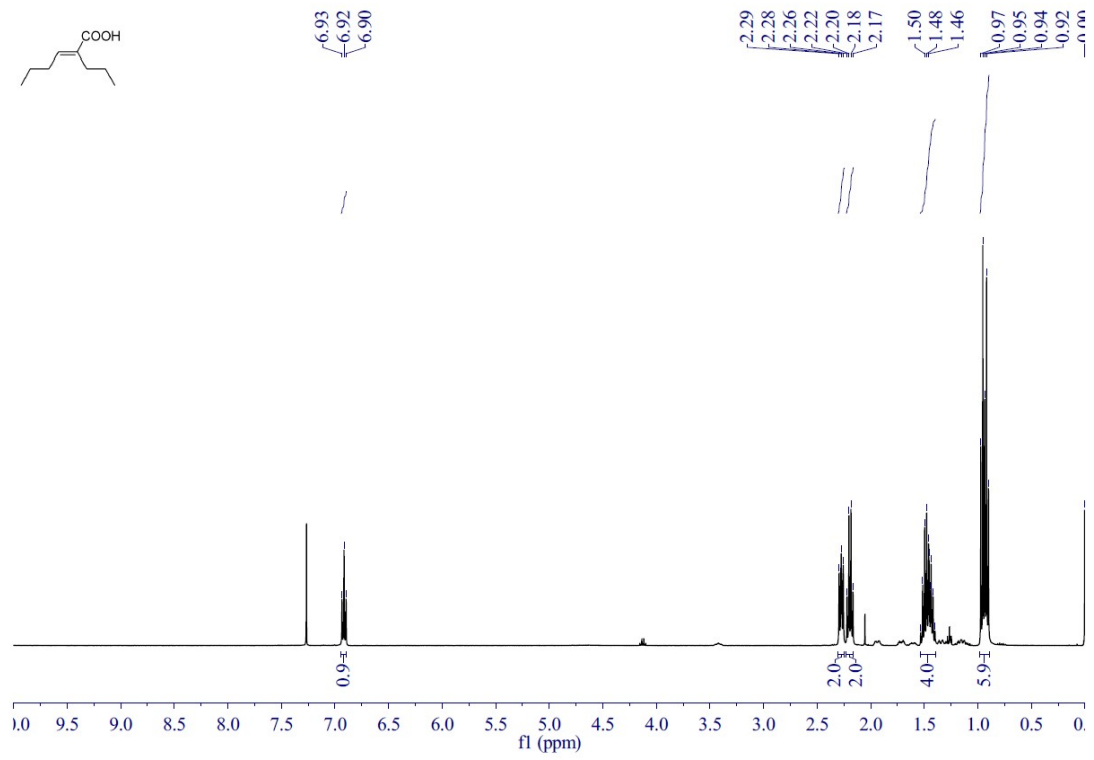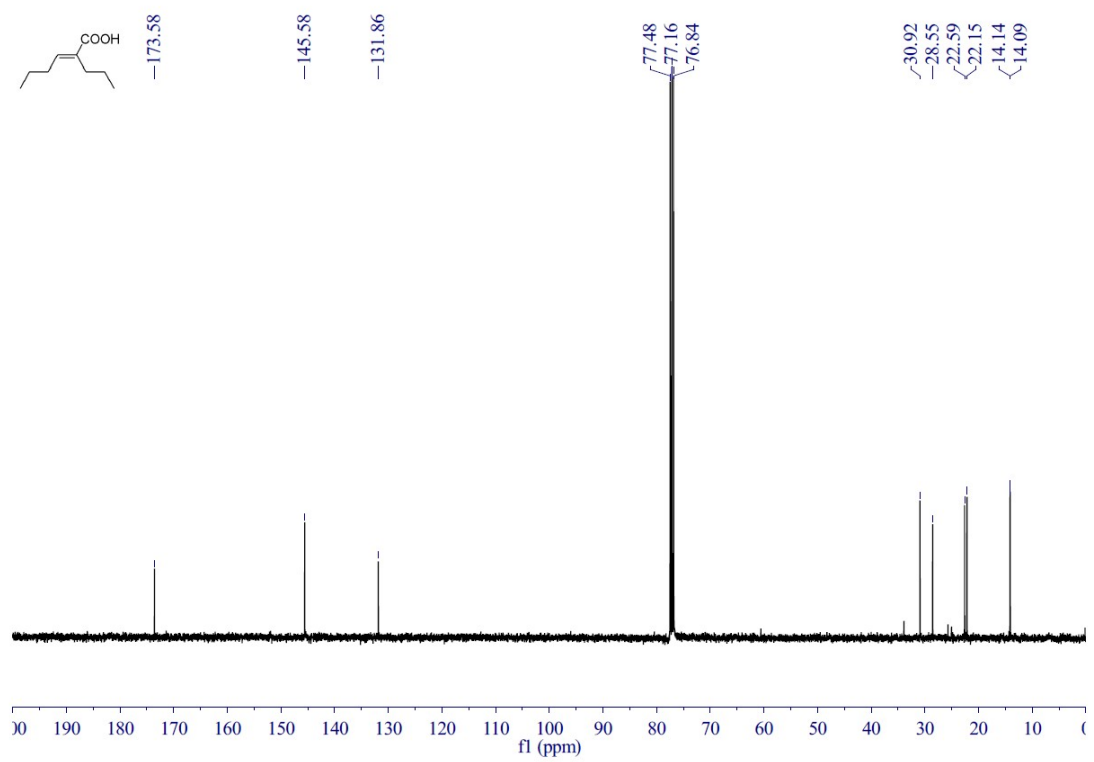

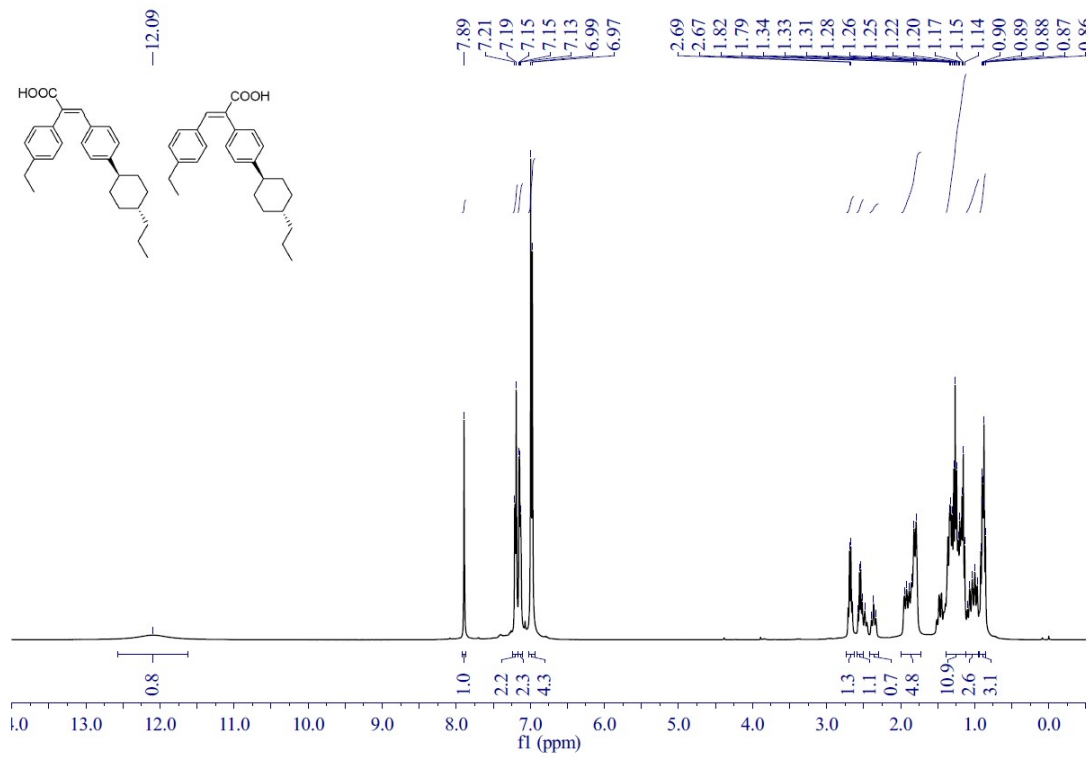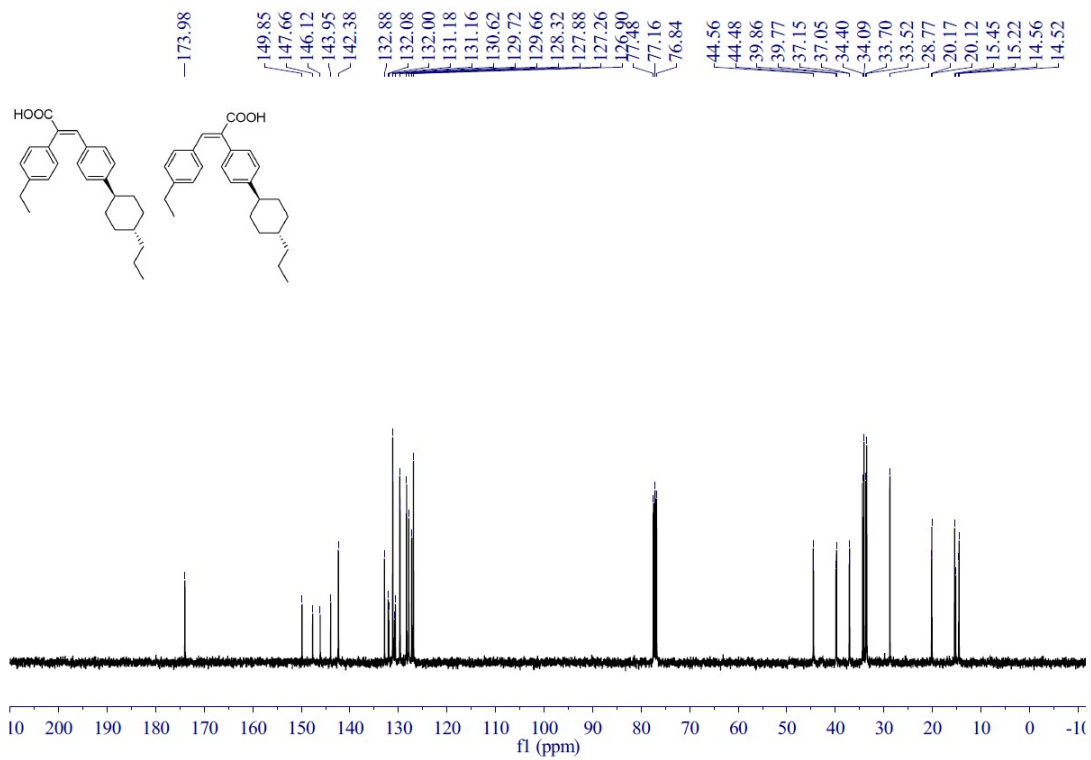

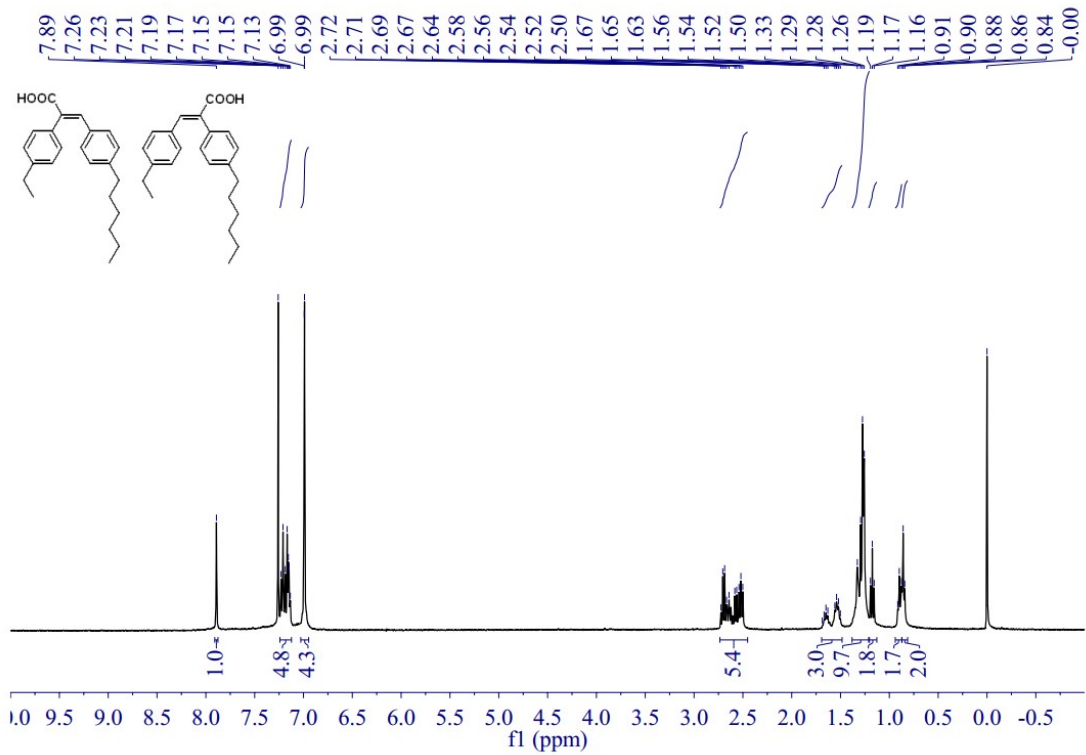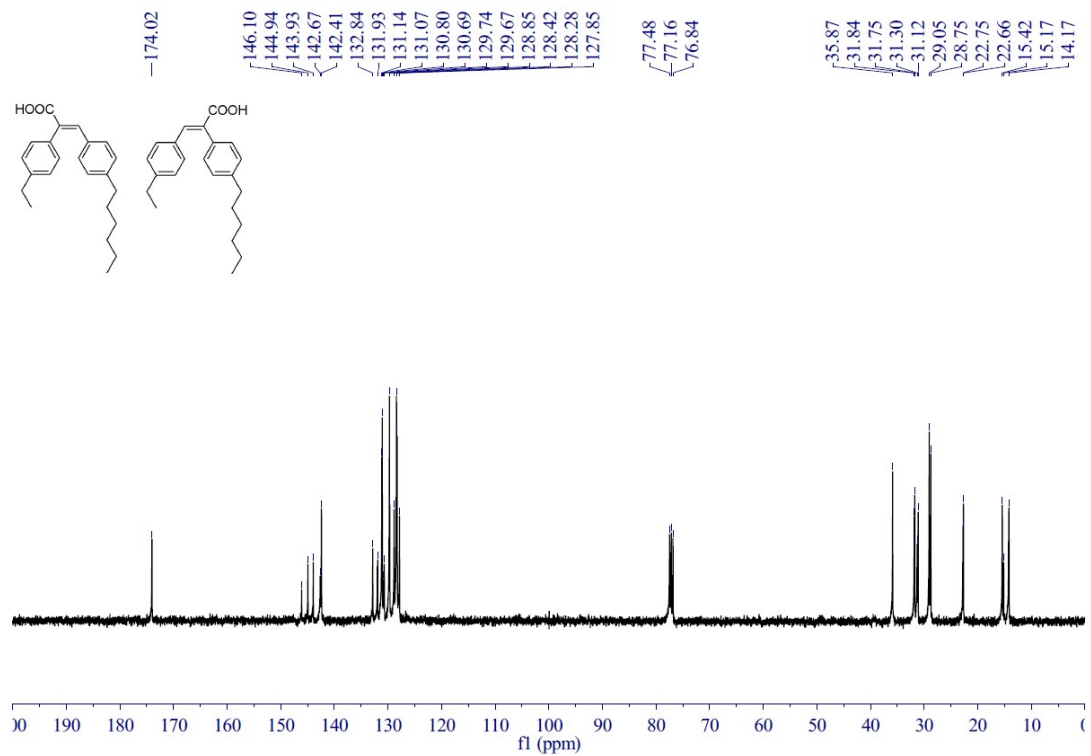

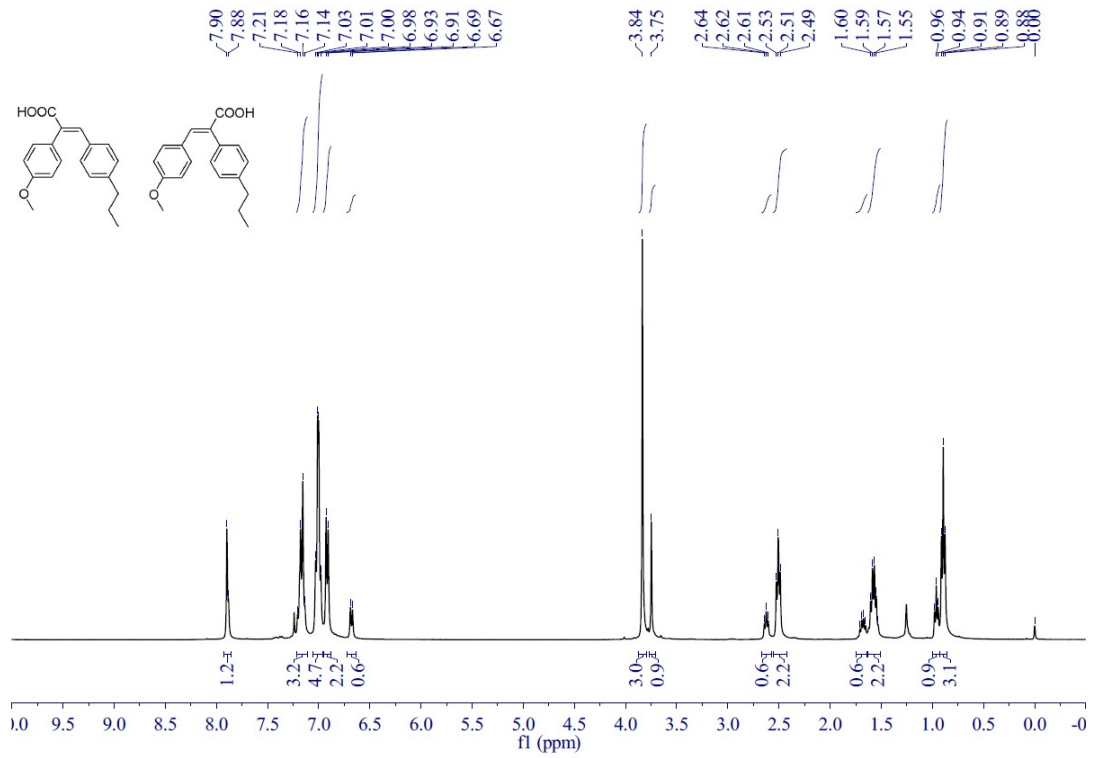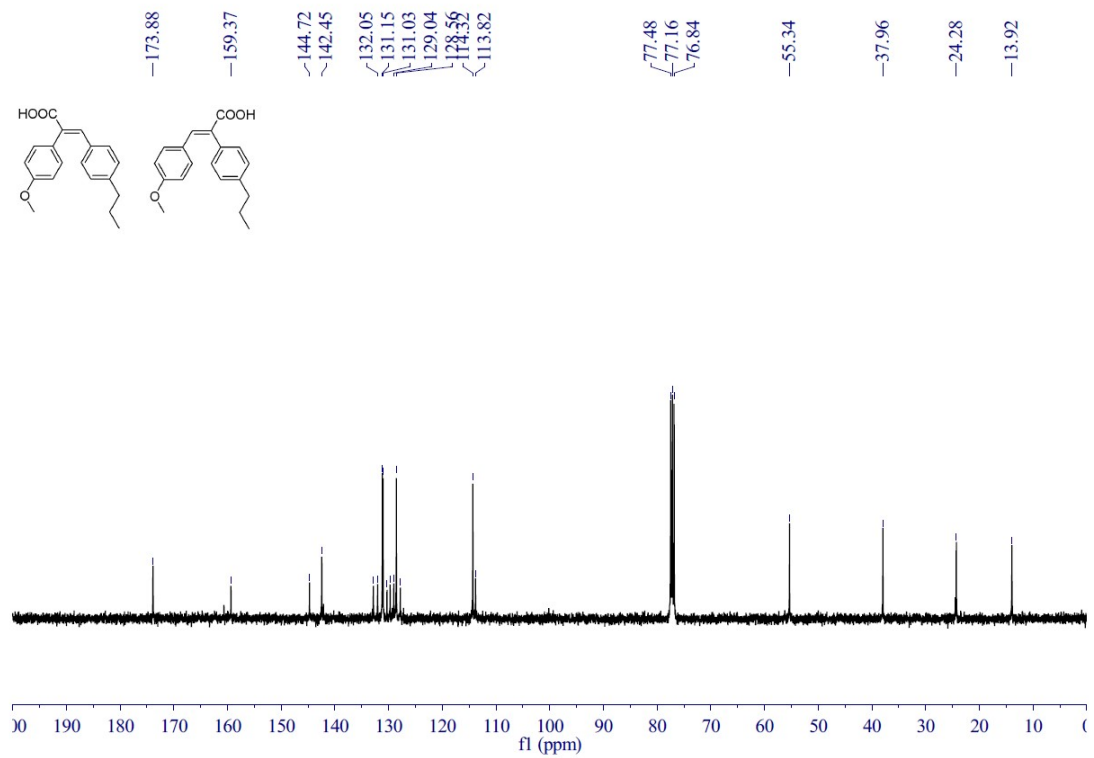

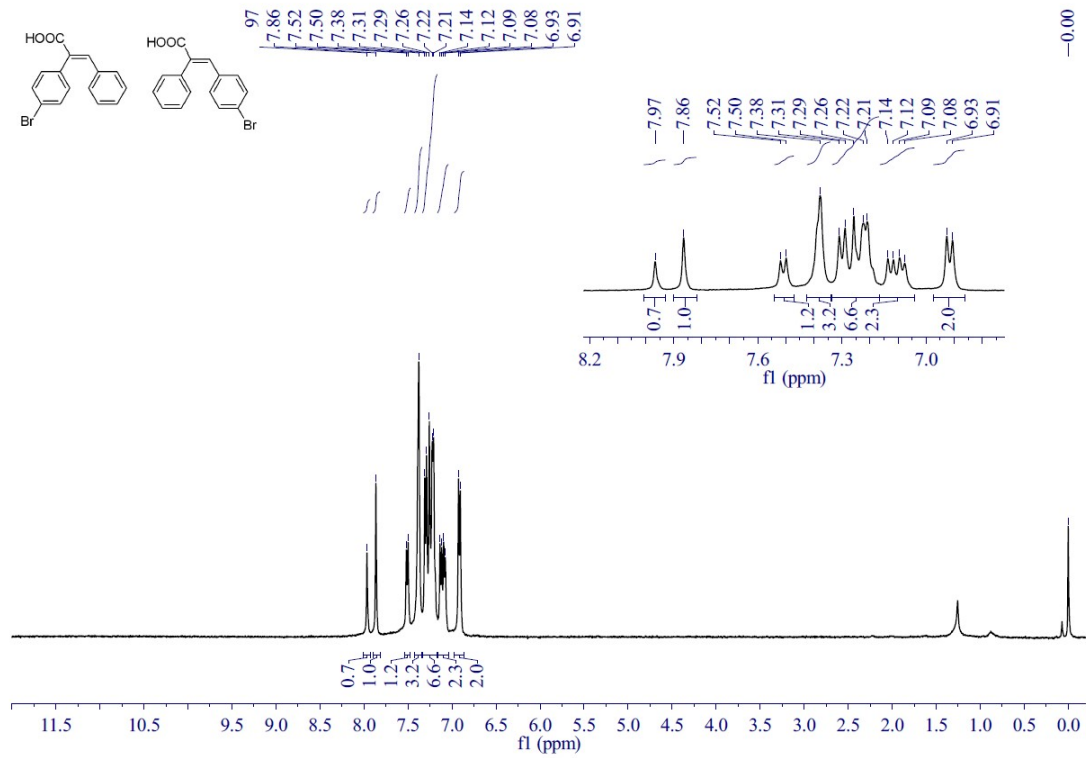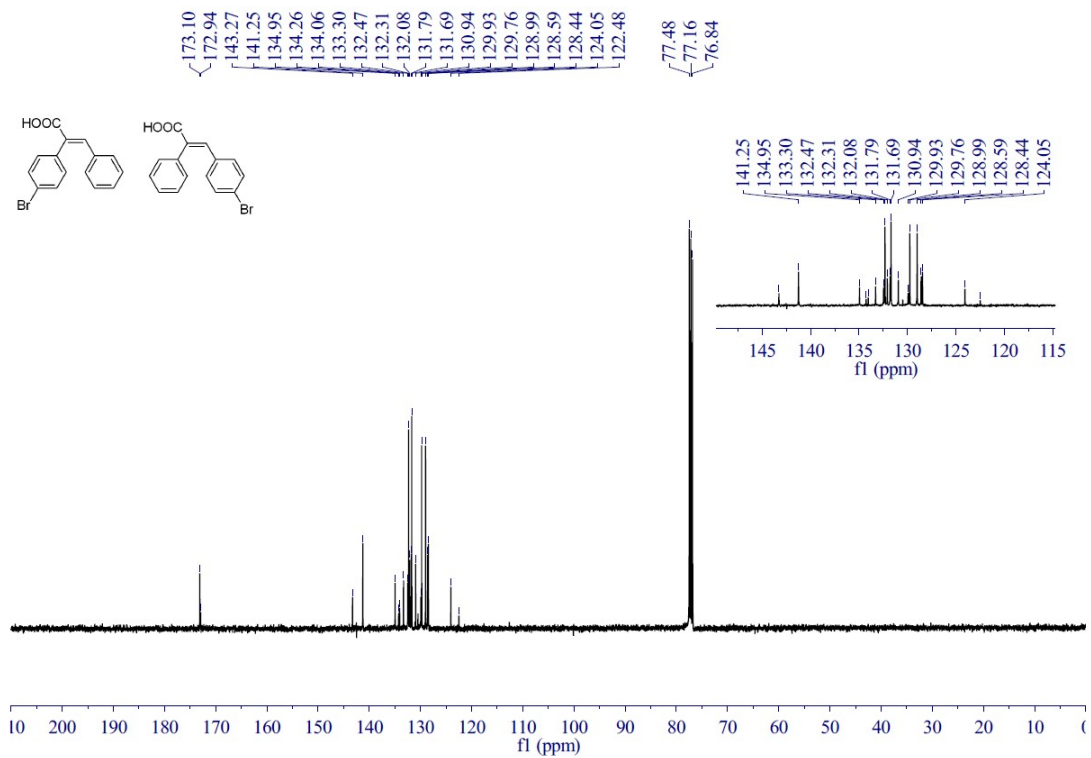

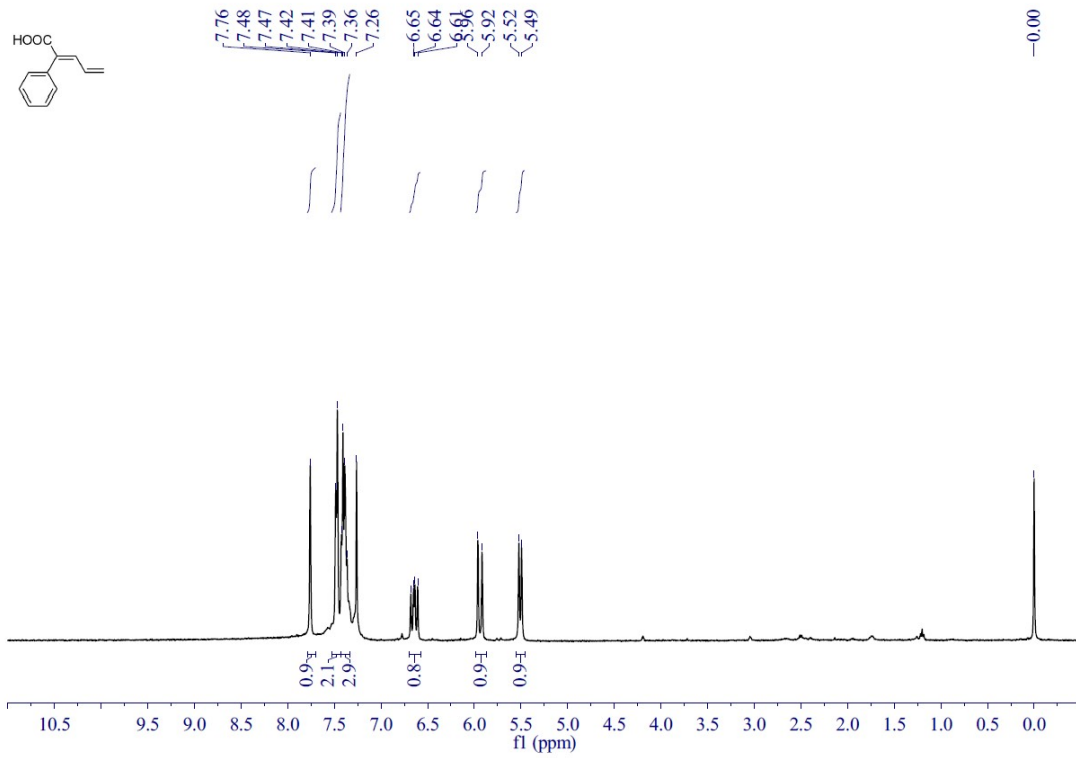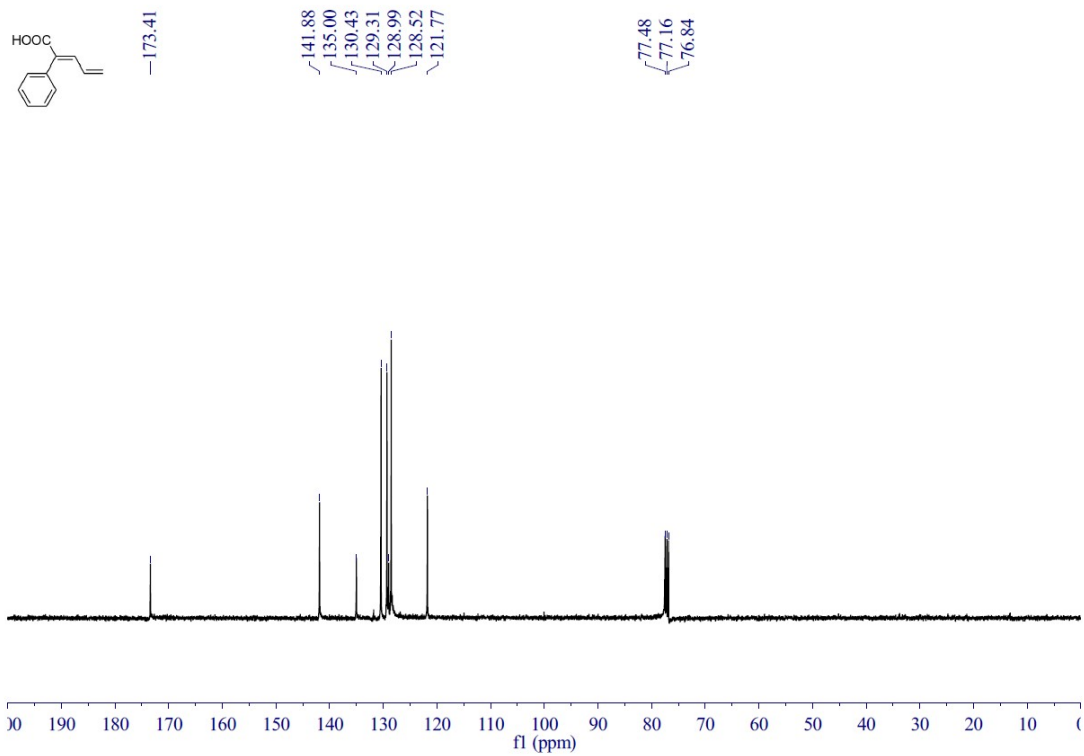



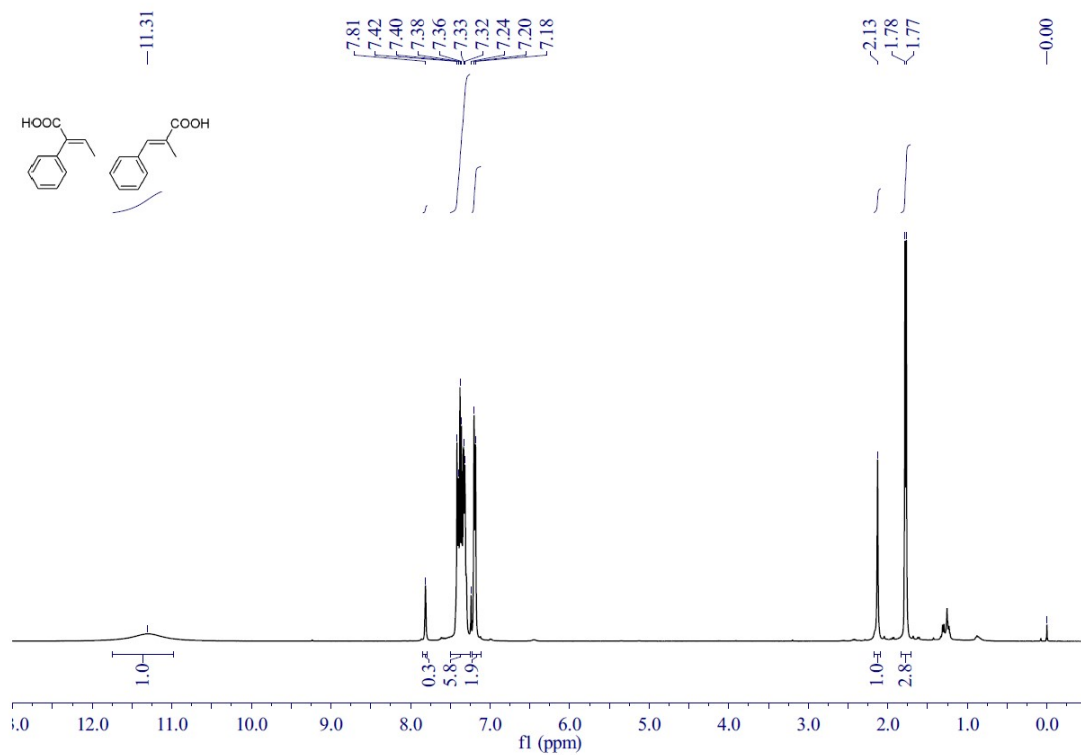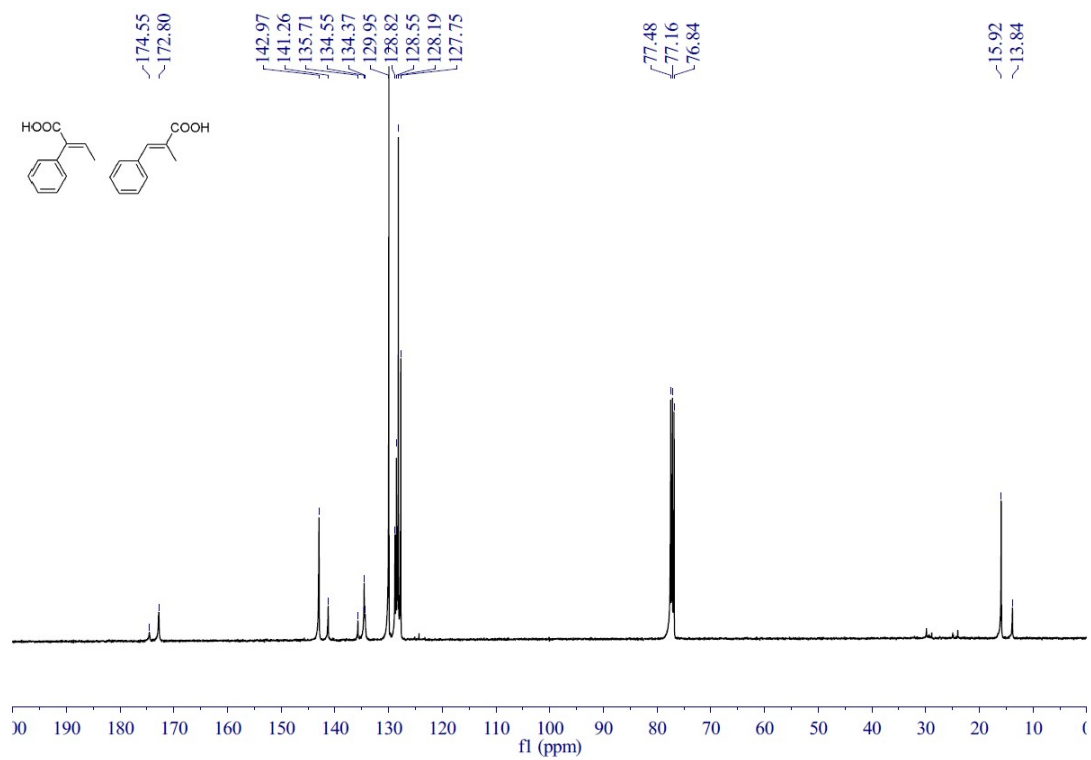

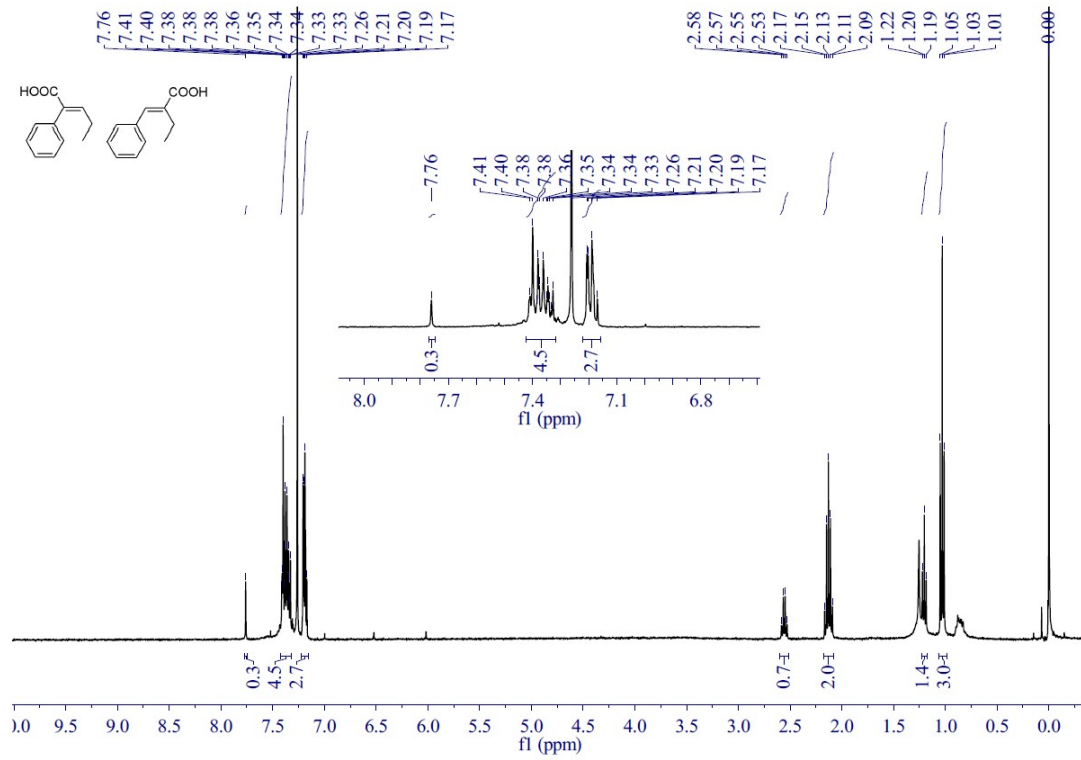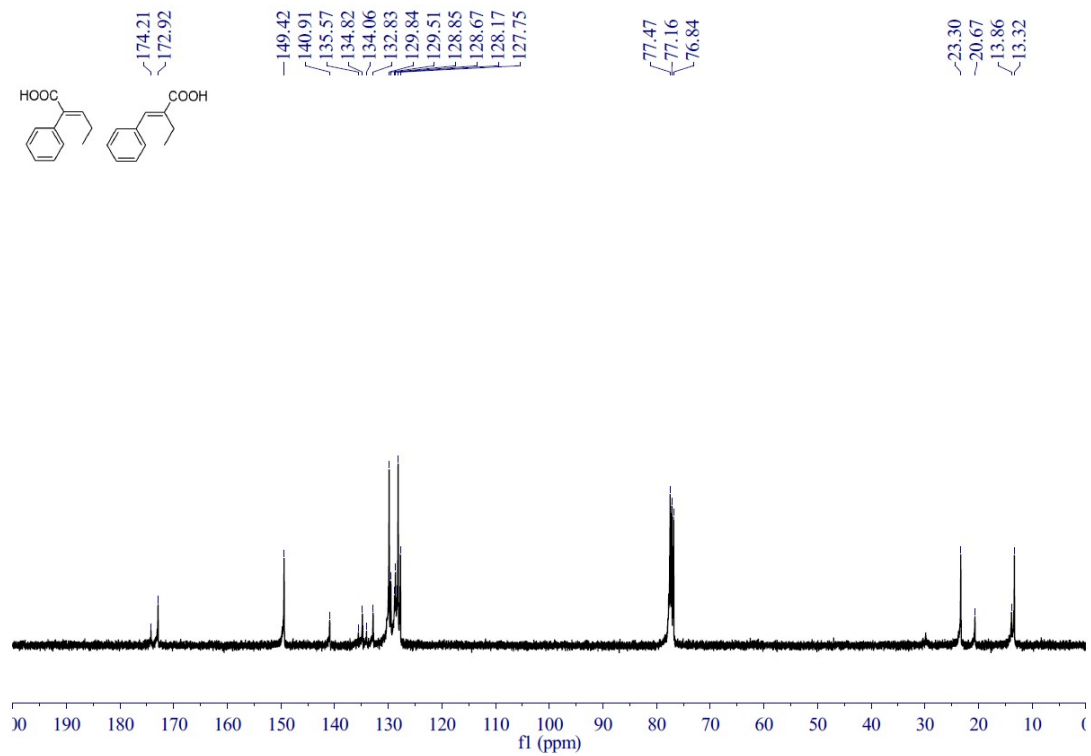

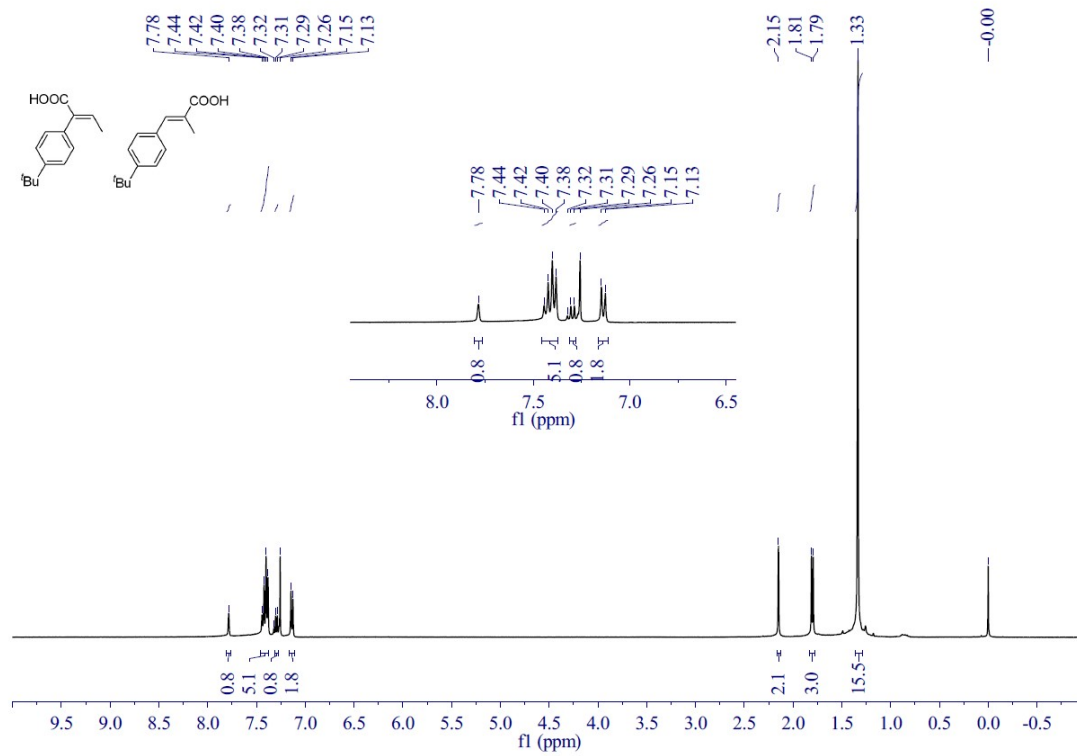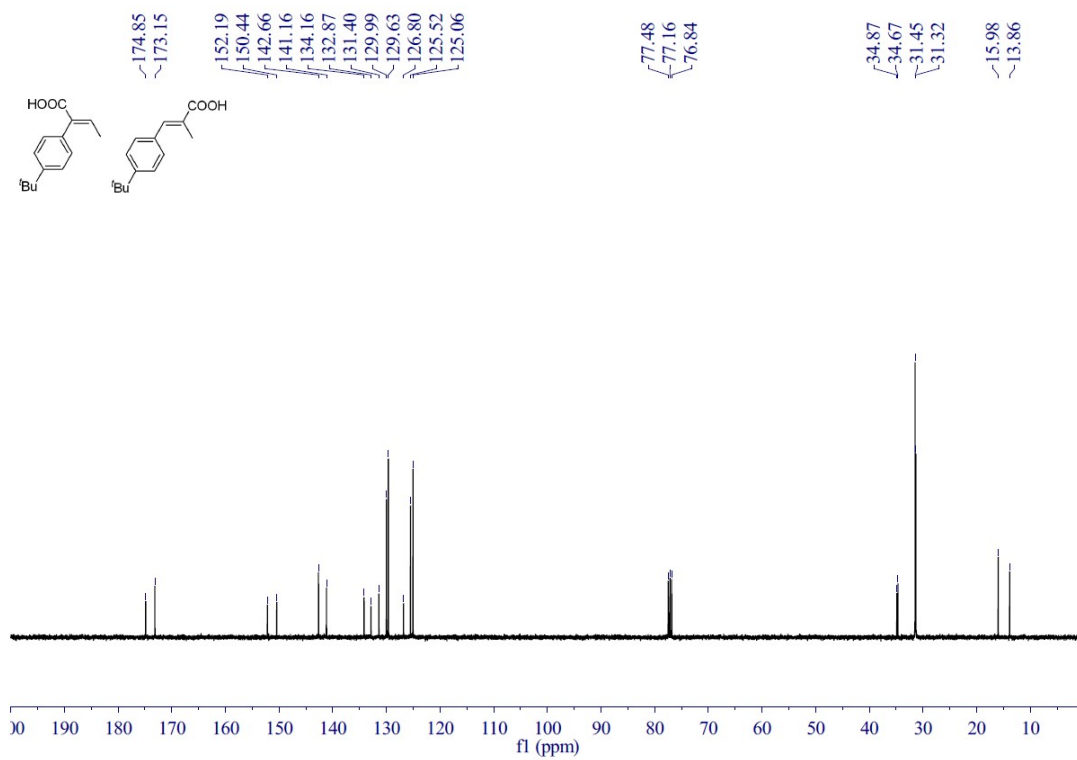

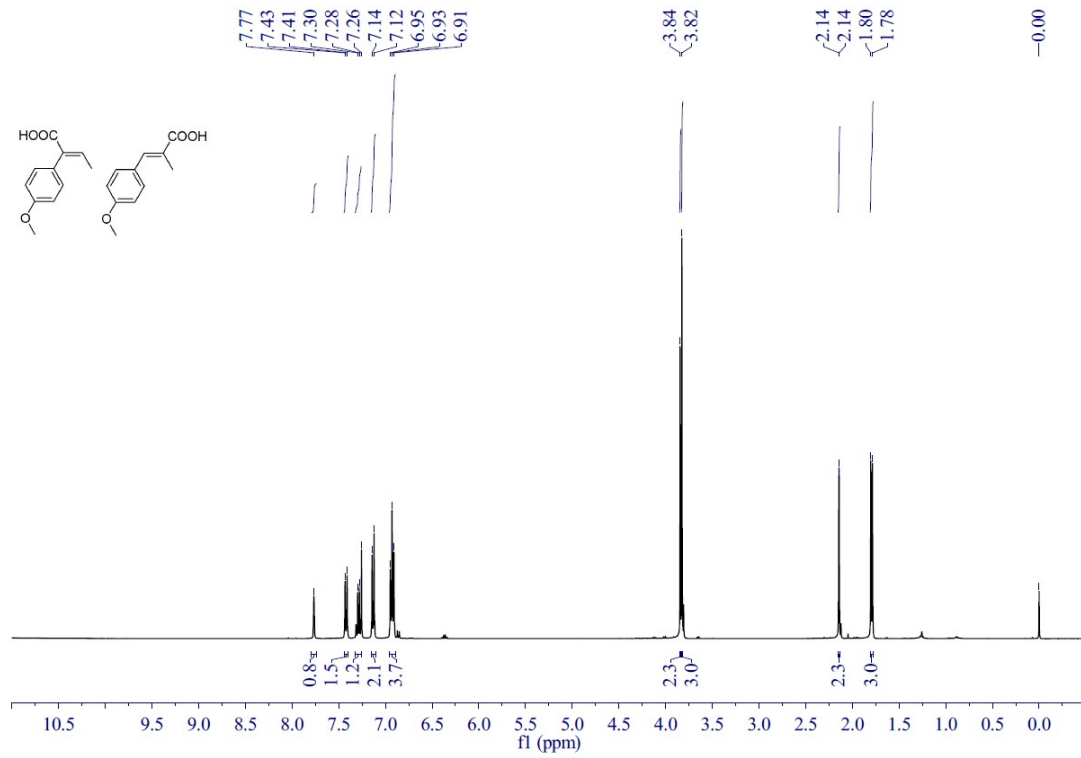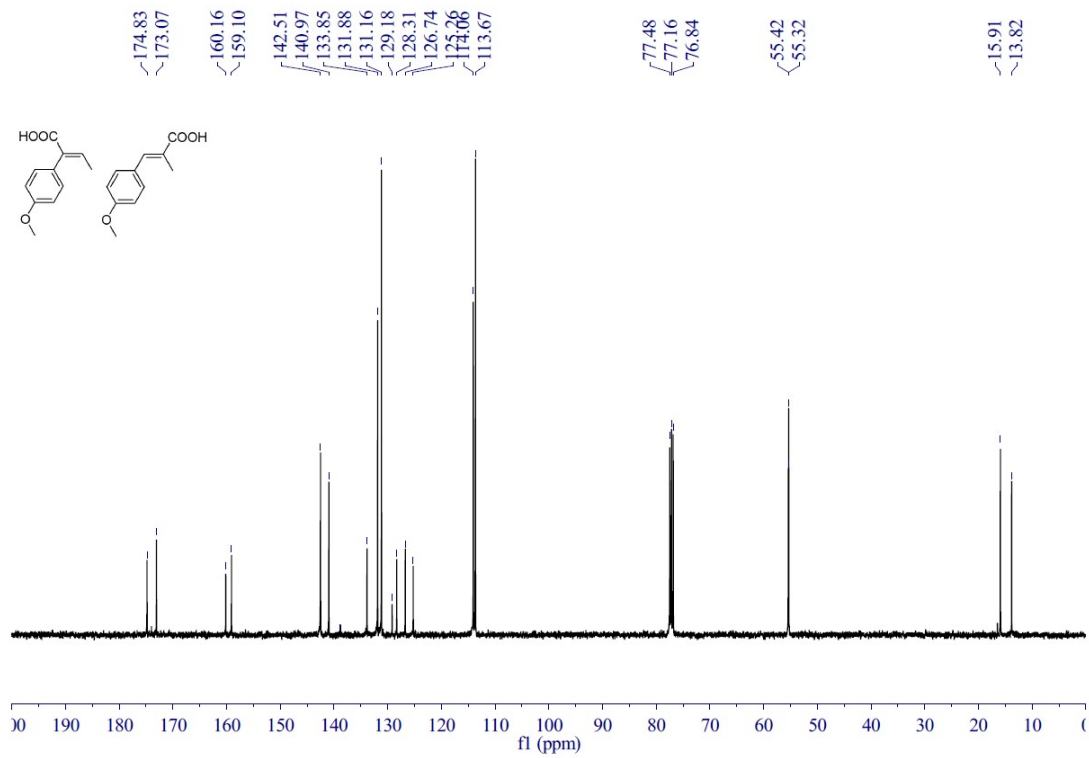

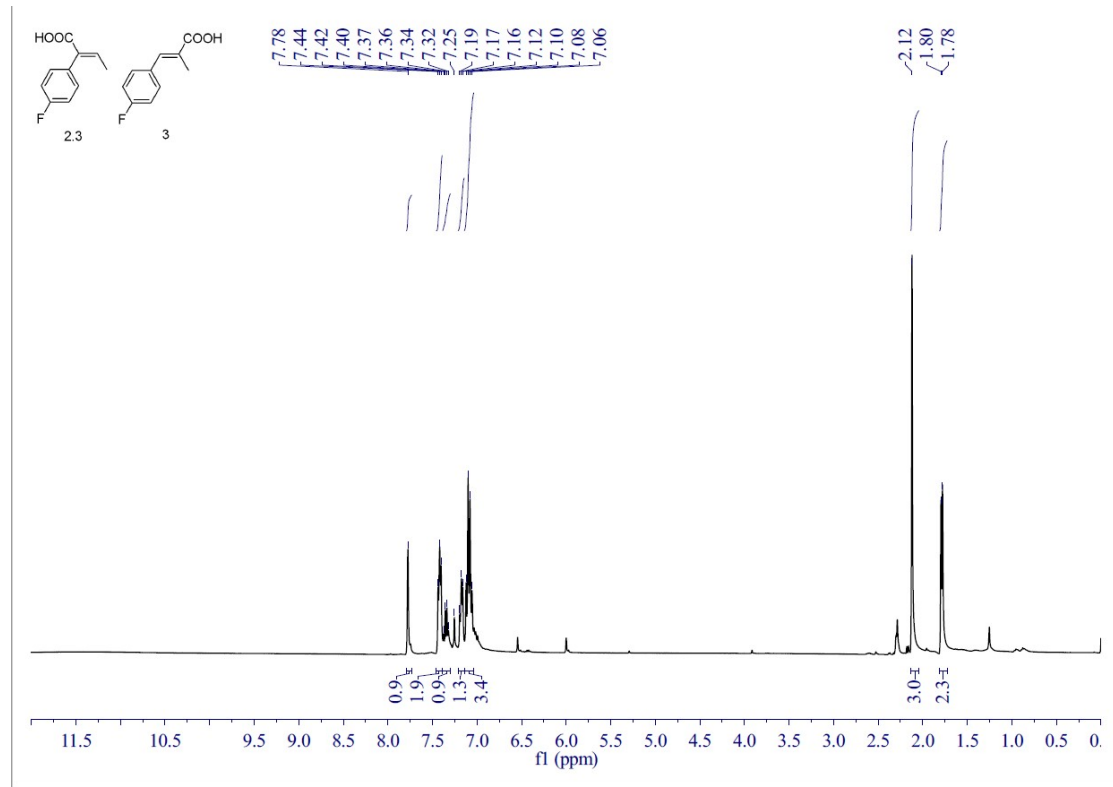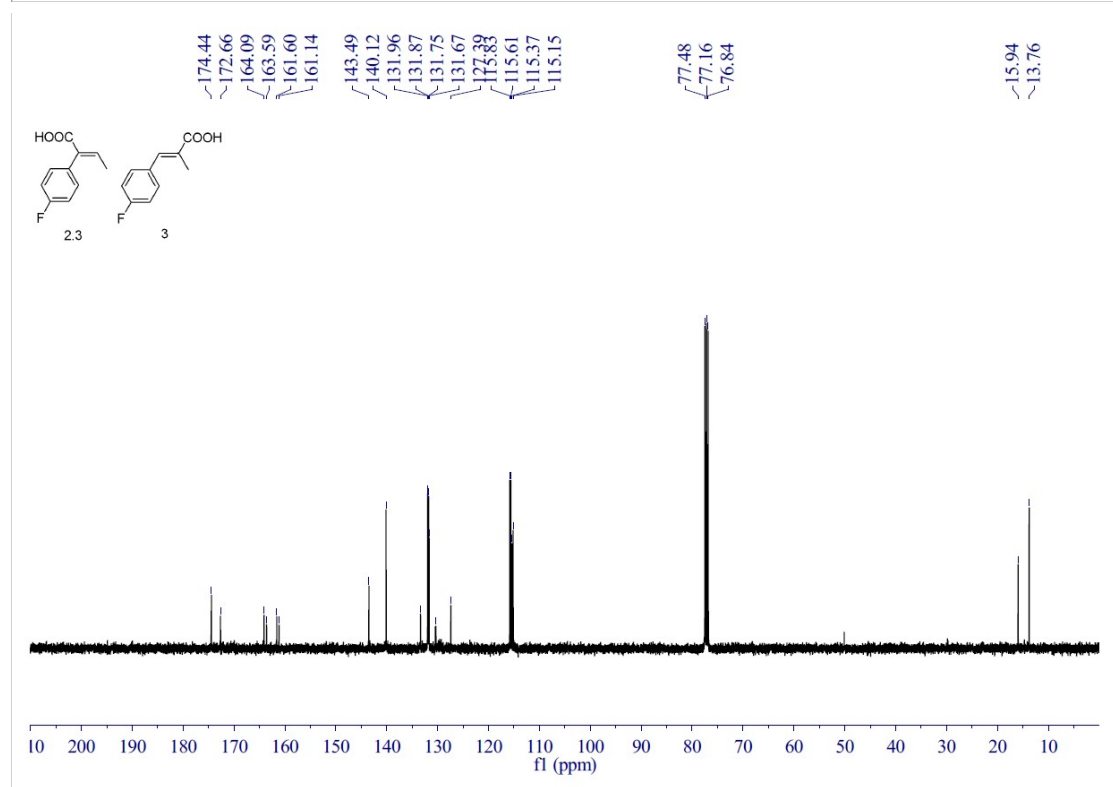

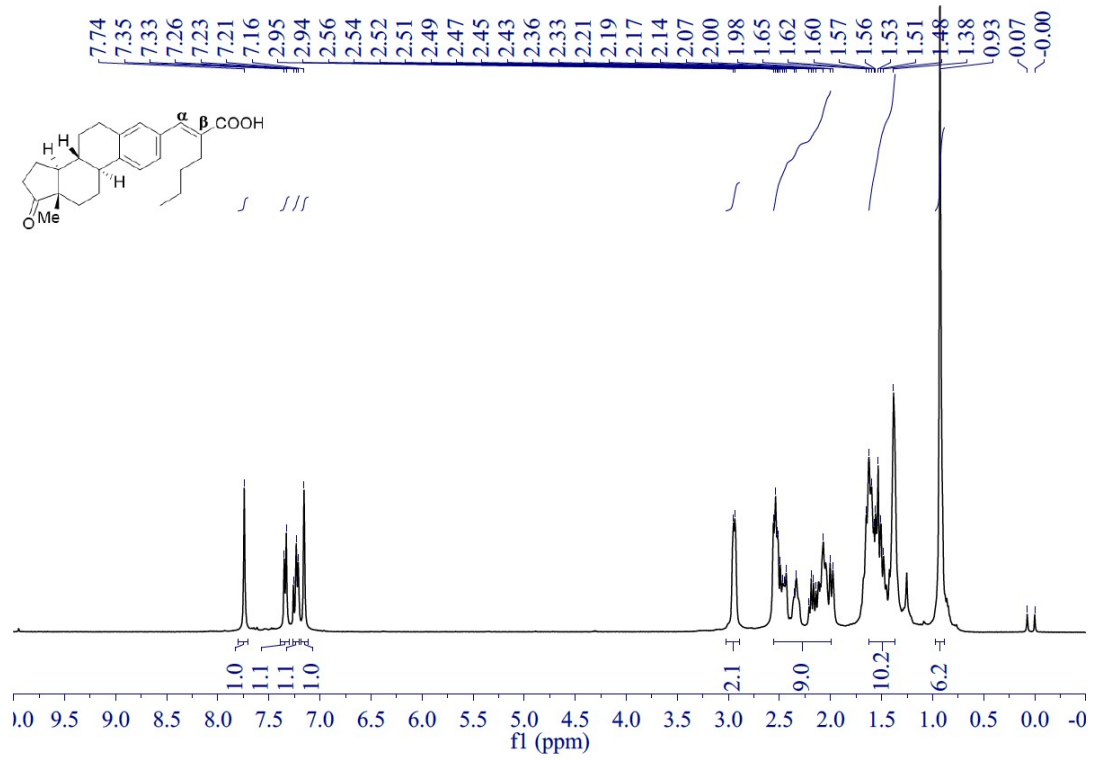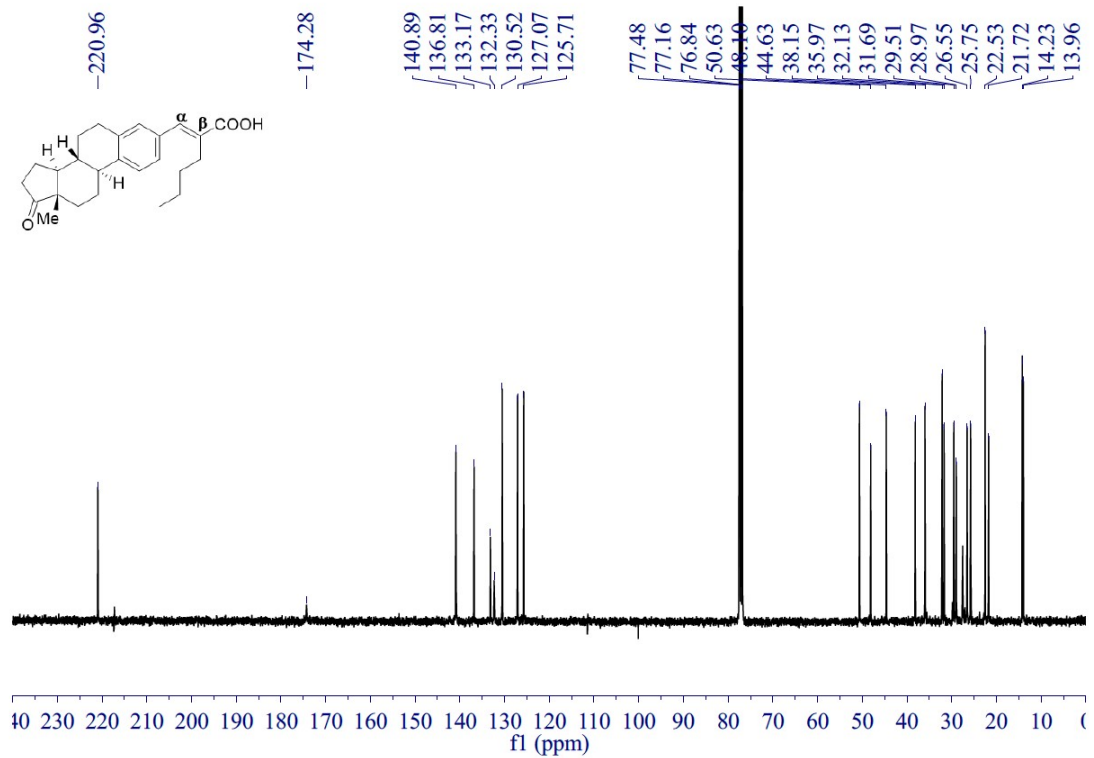

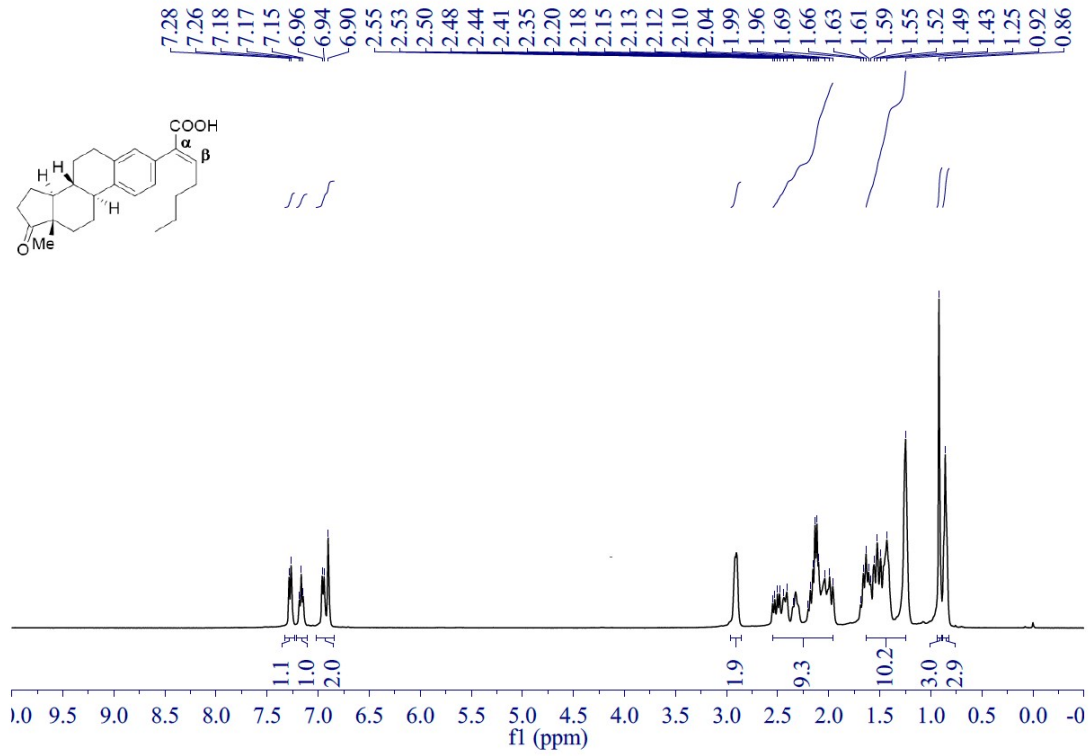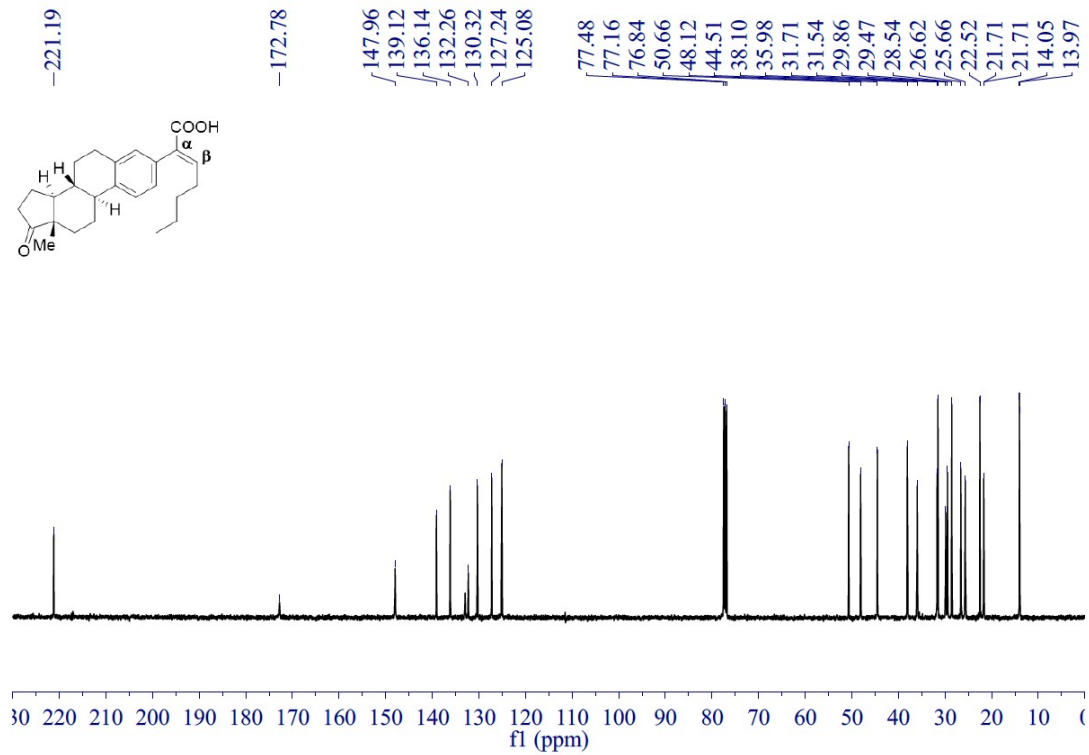

## 12. References

- (1) T. Fujihara, T. Xu, K. Semba, J. Terao, and Y. Tsuji, *Angew. Chem., Int. Ed.*, 2011, **50**, 523-527.
- (2) S. Li, W. Yuan and S. Ma, *Angew. Chem., Int. Ed.*, 2011, **50**, 2578-2582.
- (3) T. G. Back, and K. Minksztyl, *Chem. Commun.*, 1997, 1759-1760.
- (4) J. Hou, J. H. Xie and Q. L. Zhou, *Angew. Chem., Int. Ed.*, 2015, **54**, 6302
- (5) (a) E. Szlyk, R. Kucharek, I. Szymańska and L. Pazderski, *Polyhedron* 2003, **22**, 3389; (b) X. Yu, W. Fan, G. Wang, S. Lin, Z. Li, M. Liu, Y. Yang, X. Xin and Q. Jin, *Polyhedron*, 2019, **157**, 301; (c) P. Comba, C. Katsichtis, B. Nuber and H. Pritzkow, *Eur. J. Inorg. Chem.*, 1999, 777; (d) J. E. Borger, M. S. Bakker, A. W. Ehlers, M. Lutz, J. C. Sloatweg and K. Lammertsma, *Chem. Commun.*, 2016, **52**, 3284; (e) E. Fournier, S. Sicard, A. Decken, P. D. Harvey, *Inorg. Chem.*, 2004, **43**, 1491; (f) R. Shen, T. Chen, Y. Zhao, R. Qiu, Y. Zhou, S. Yin, X. Wang, M. Goto and L. B. Han, *J. Am. Chem. Soc.*, 2011, **133**, 17037.
- (6) M. J. Frisch, et al. Gaussian 09, Revision D.01, Gaussian Inc., Wallingford, CT, (2009).
- (7) A. D. Becke, *J. Chem. Phys.*, 1993, **98**, 1372-1377.
- (8) A. D. Becke, *Phys. Rev. A.*, 1988, **38**, 3098-3100.
- (9) A. D. Becke, *J. Chem. Phys.*, 1993, **98**, 5648-5652.
- (10) C. Lee, W. Yang and R. G. Parr, *Phys. Rev. B.*, 1988, **37**, 785-789.
- (11) A. V. Marenich, C. J. Cramer and D. G. Truhlar, *J. Phys. Chem. B.*, 2009, **113**, 6378-6396.
